# Supplementary material for: A metal-free tandem approach to prepare structurally diverse N-heterocycles: synthesis of 1,2,4-oxadiazoles and pyrimidinones
Source: Royal Society of Chemistry journal article supplement (doi:10.1039/c4nj00361f), 2014-01-01
Supplement: c4nj00361f1.pdf [file c4nj00361f1.pdf]

## Supporting Information

### Metal-Free Tandem Approach to Structurally Diverse N-Heterocycles: Synthesis of 1,2,4-Oxadiazoles and Pyrimidinones

Puneet K.Gupta,<sup>a</sup> Mohd. Kamil Hussain,<sup>a</sup> Mohd. Asad,<sup>a</sup> Ruchir Kant,<sup>b</sup> Rohit Mahar,<sup>c</sup> Sanjeev K. Shukla<sup>c</sup> & K. Hajela<sup>\*a</sup>

<sup>a</sup>Division of Medicinal and Process Chemistry, <sup>b</sup>Molecular and Structural Biology Division,  
<sup>c</sup>Sophisticated Analytical Instrument Facility, CSIR-Central Drug Research Institute, BS-10/1, Sector  
10, Jankipuram extension, Sitapur Road, P.O. Box 173, Lucknow 226031, India

[kanchan\\_hajela@cdri.res.in](mailto:kanchan_hajela@cdri.res.in)

| Contents                                                    | Page No. |
|-------------------------------------------------------------|----------|
| <sup>1</sup> H and <sup>13</sup> C NMR Spectra of compounds | S2-S45   |
| <sup>1</sup> H Spectra of CDCl <sub>3</sub>                 | S46      |

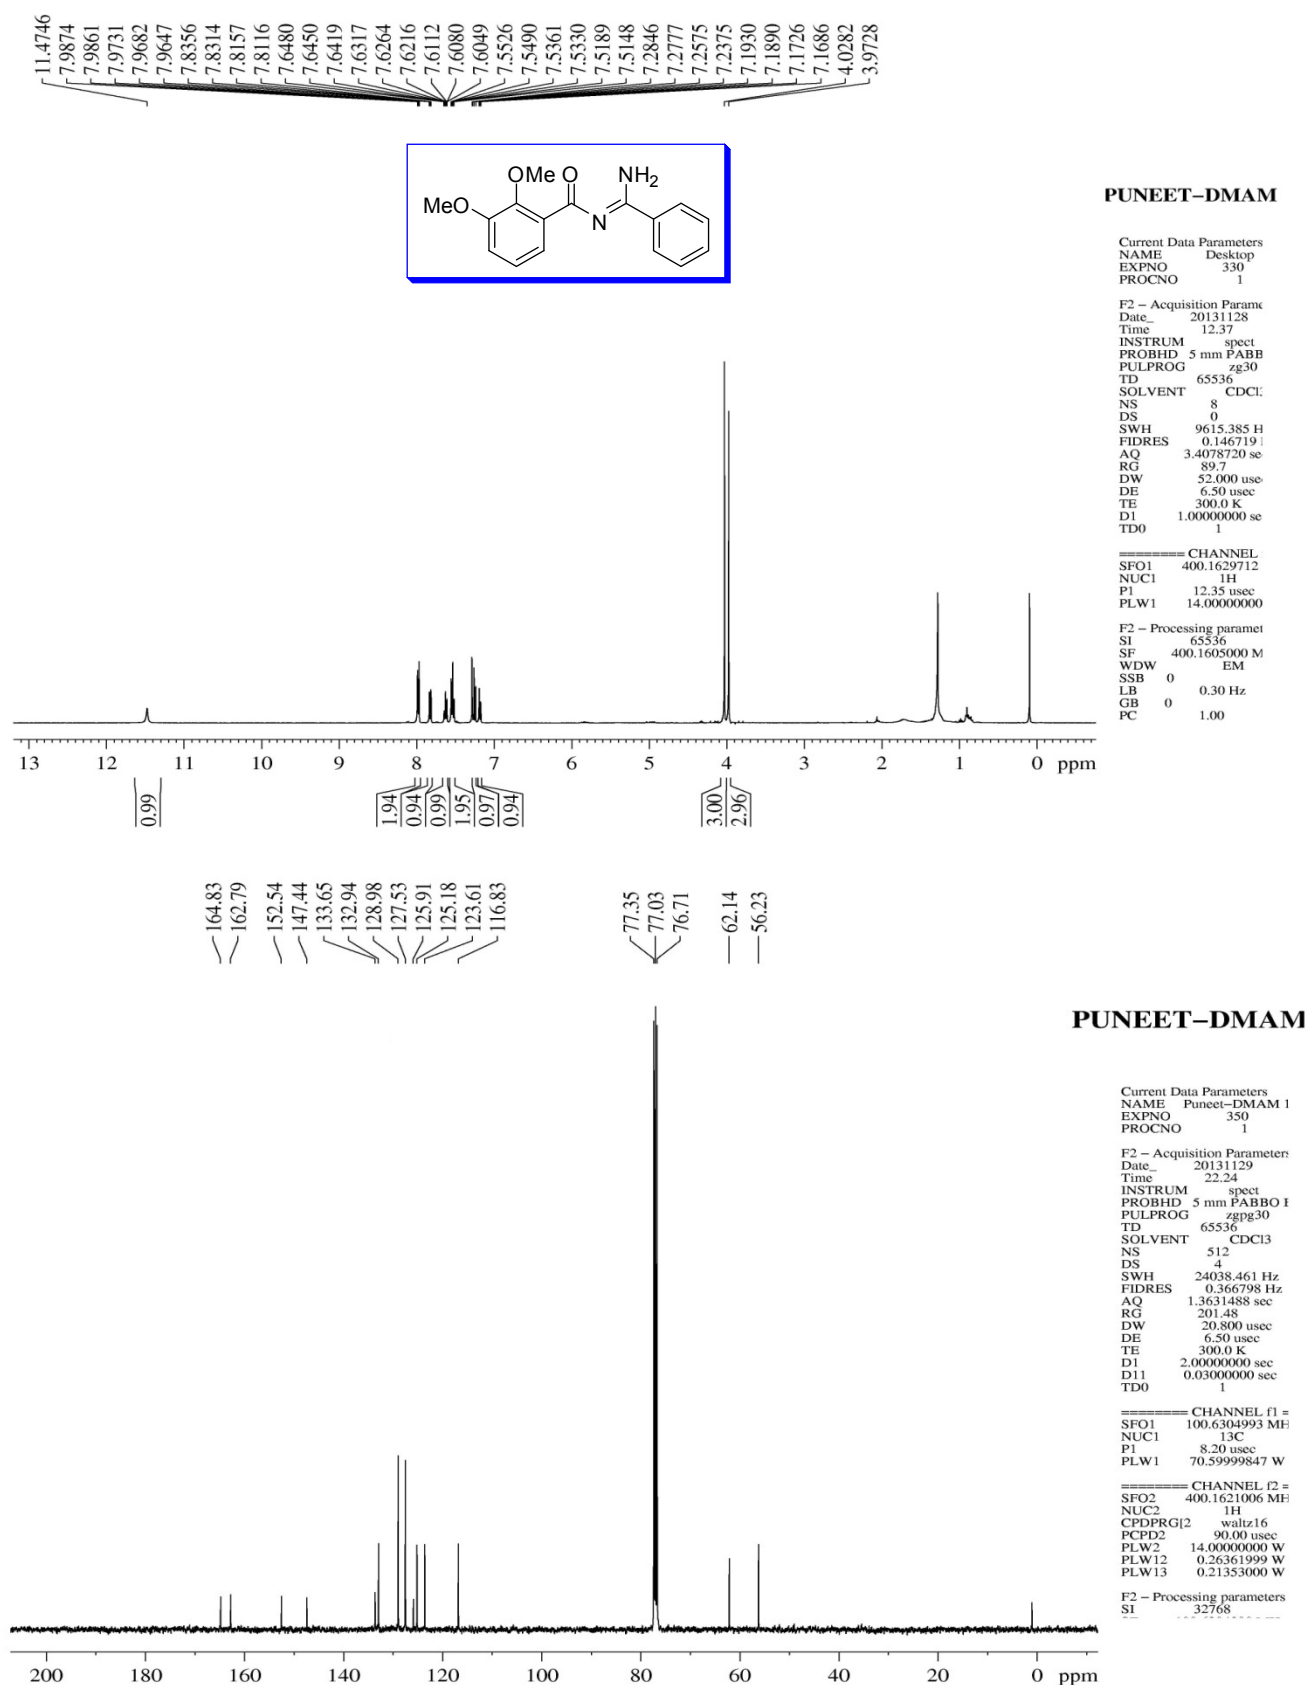

**Figure 1: <sup>1</sup>H and <sup>13</sup>C Spectra of Acyl amidine**

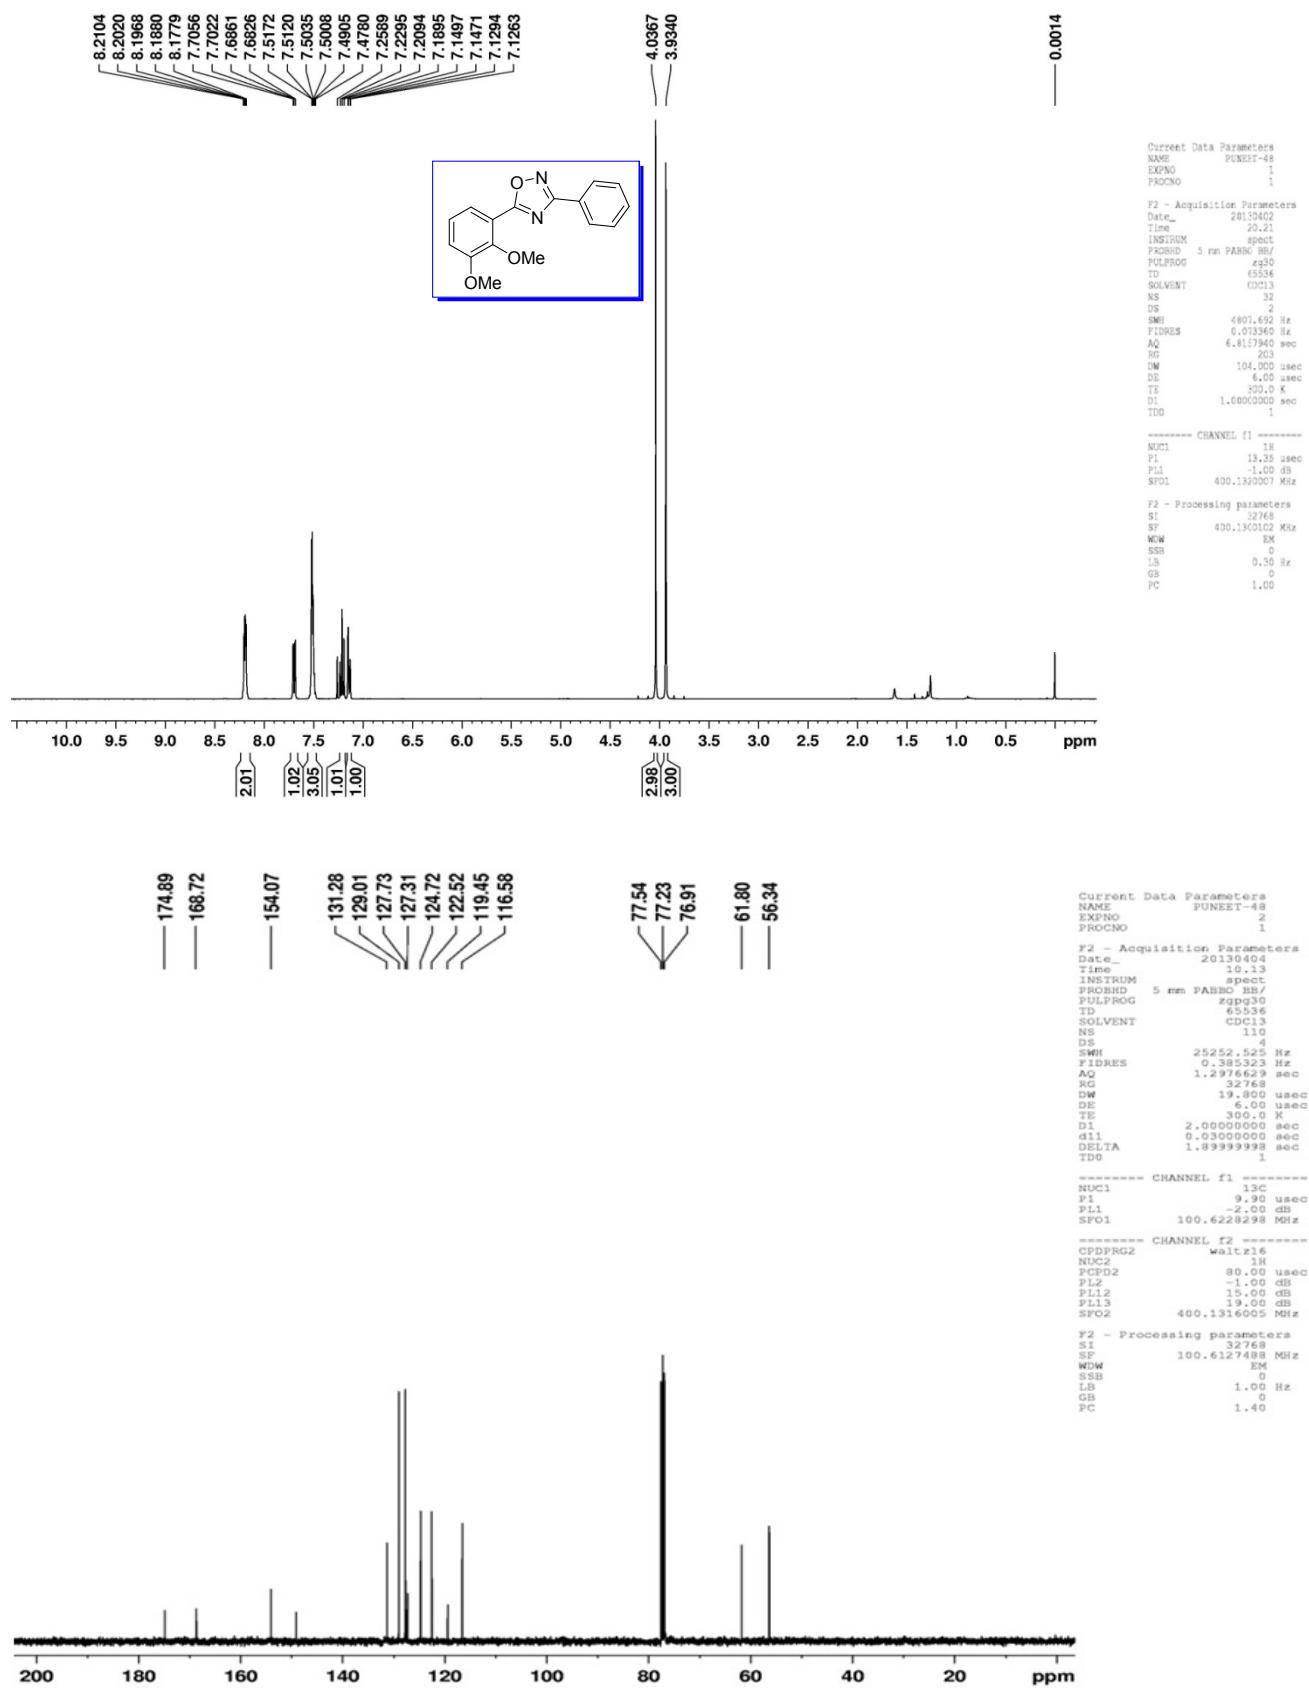

Figure 2: <sup>1</sup>H and <sup>13</sup>C Spectra of compound 3a

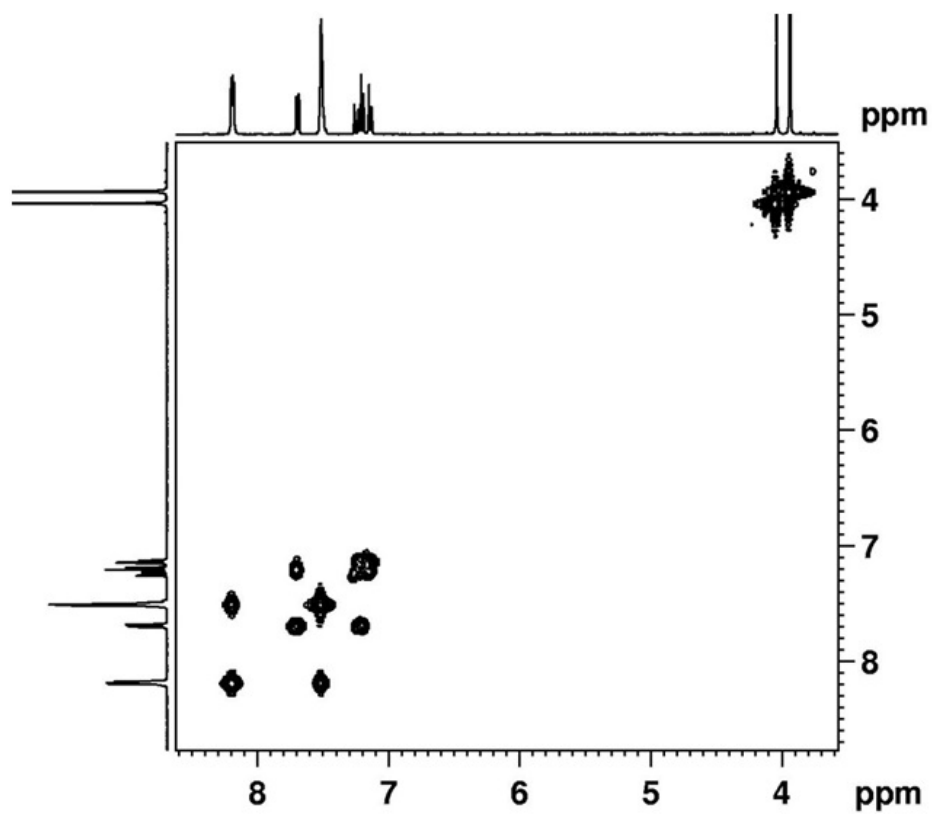

Figure 3: COSY spectrum of compound 3a

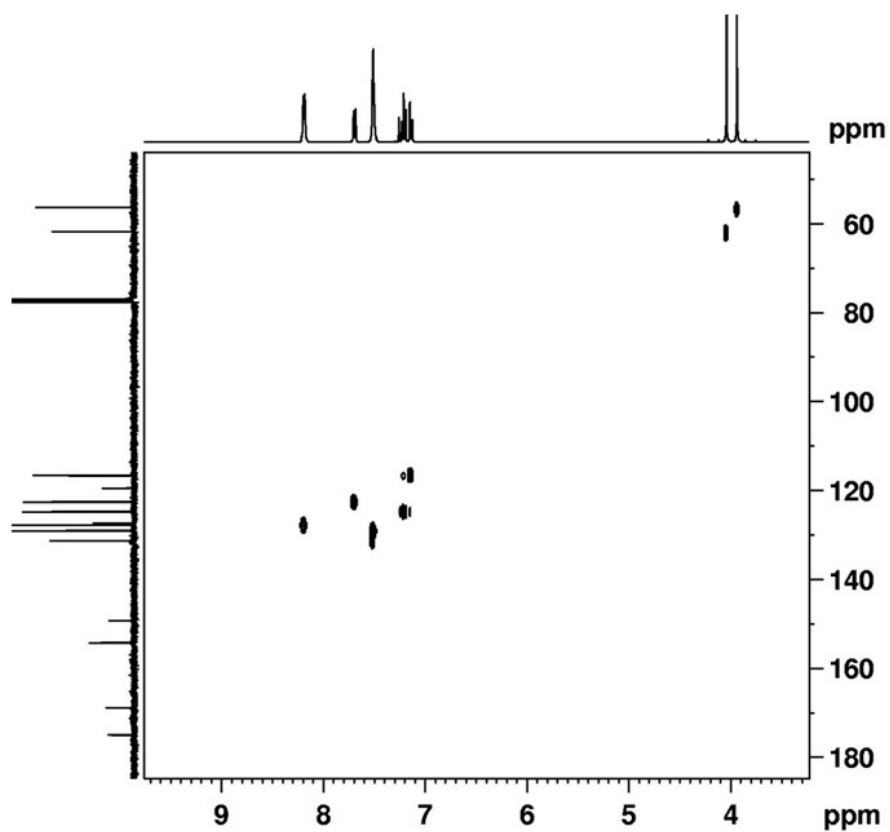

Figure 4: HSQC spectrum of compound 3a



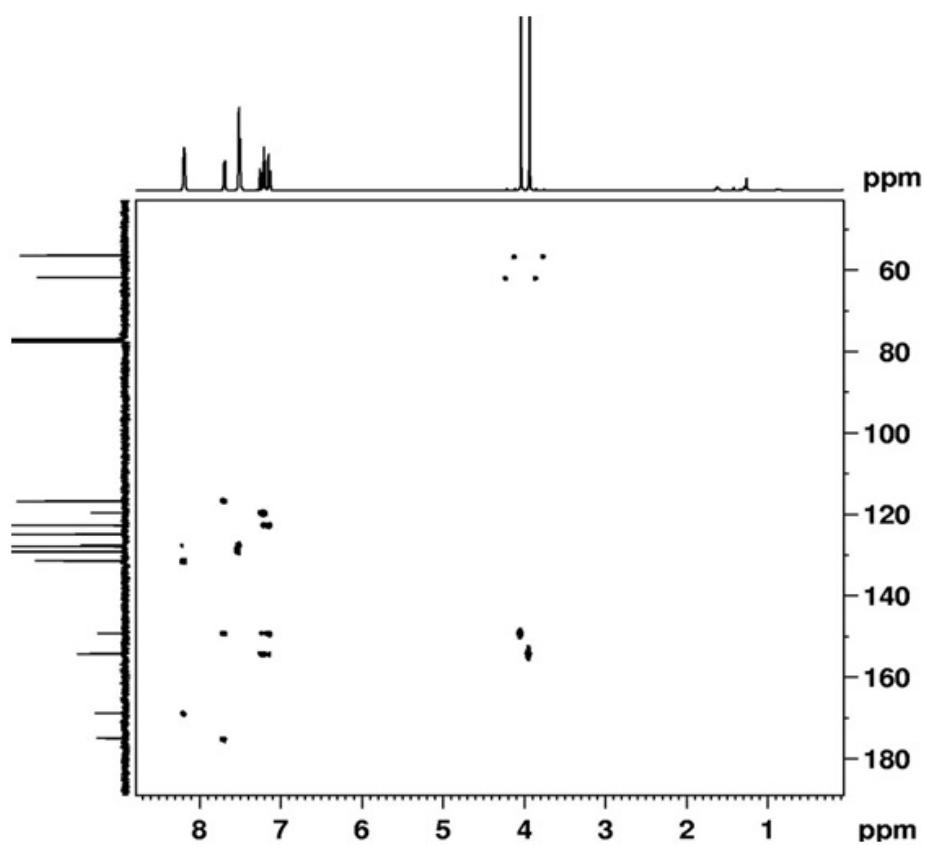

**Figure 5: HMBC spectrum of compound 3a**

### Important HMBC correlations of 3a

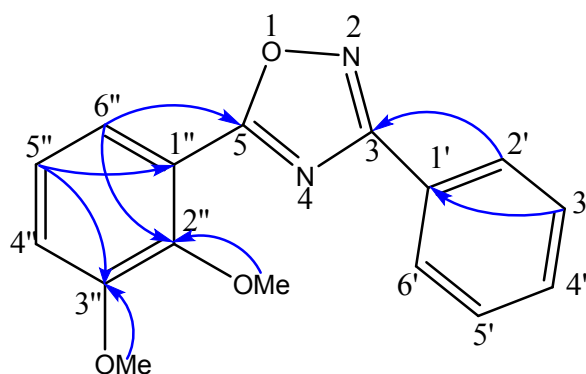

| Carbon position | <sup>13</sup> C Chemical shift (ppm) | <sup>1</sup> H Chemical shift (ppm) |
|-----------------|--------------------------------------|-------------------------------------|
| C-3             | 168.7                                | -                                   |
| C-5             | 174.8                                | -                                   |

|            |       |                                           |
|------------|-------|-------------------------------------------|
| C-1'       | 127.3 | -                                         |
| C-2', C-6' | 127.4 | 8.19 (m)                                  |
| C-3', C-5' | 129.0 | 7.51(m)                                   |
| C-4'       | 131.2 | 7.49 (m)                                  |
| C-1''      | 119.4 | -                                         |
| C-2''      | 149.1 | -                                         |
| C-3''      | 154.0 | -                                         |
| C-4''      | 116.6 | 7.12 (dd, $J_1 = 8.0$ Hz, $J_2 = 1.2$ Hz) |
| C-5''      | 124.7 | 7.20 (t, $J = 8.0$ Hz)                    |
| C-6''      | 122.5 | 7.68 (dd, $J_1 = 7.8$ Hz, $J_2 = 1.6$ Hz) |
| C-2''-OMe  | 61.8  | 4.03 (s)                                  |
| C-3''-OMe  | 56.3  | 3.93 (s)                                  |

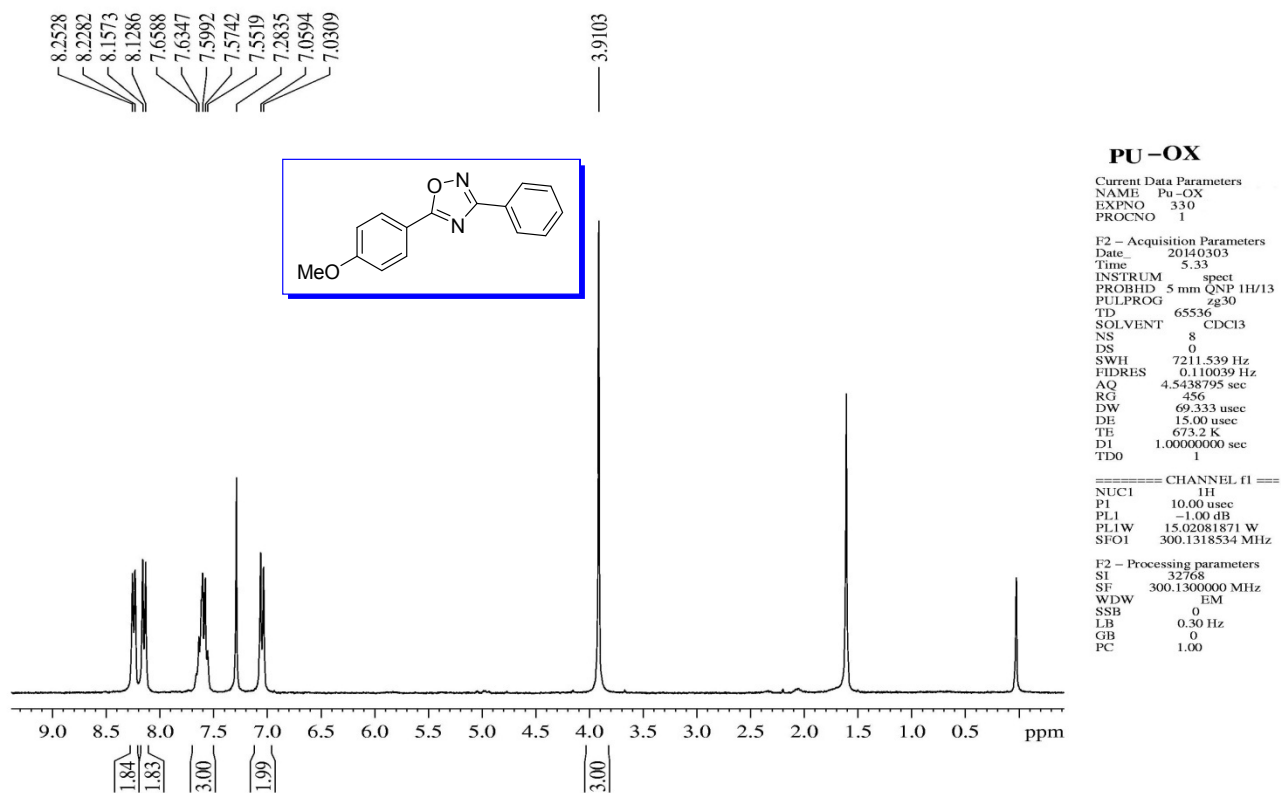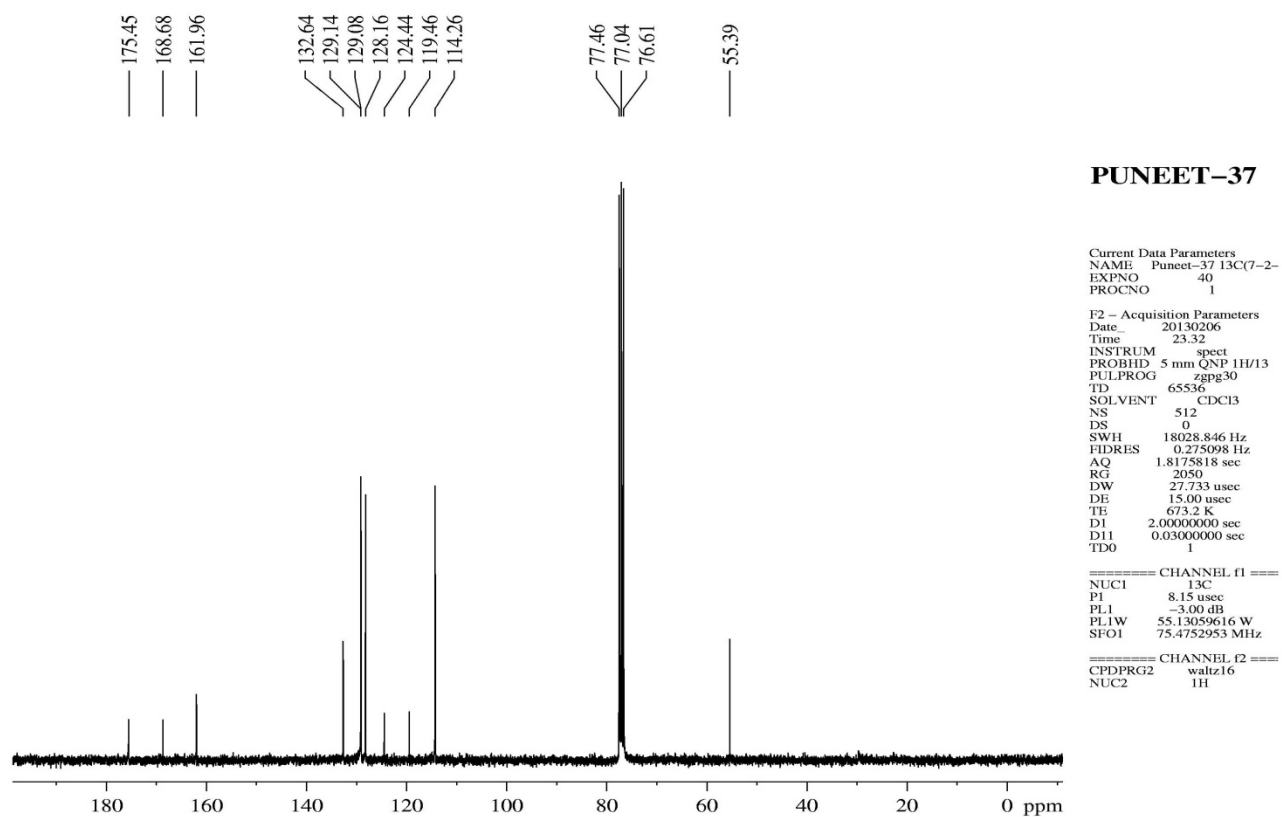

Figure 6:  $^1\text{H}$  and  $^{13}\text{C}$  Spectra of compound 3b

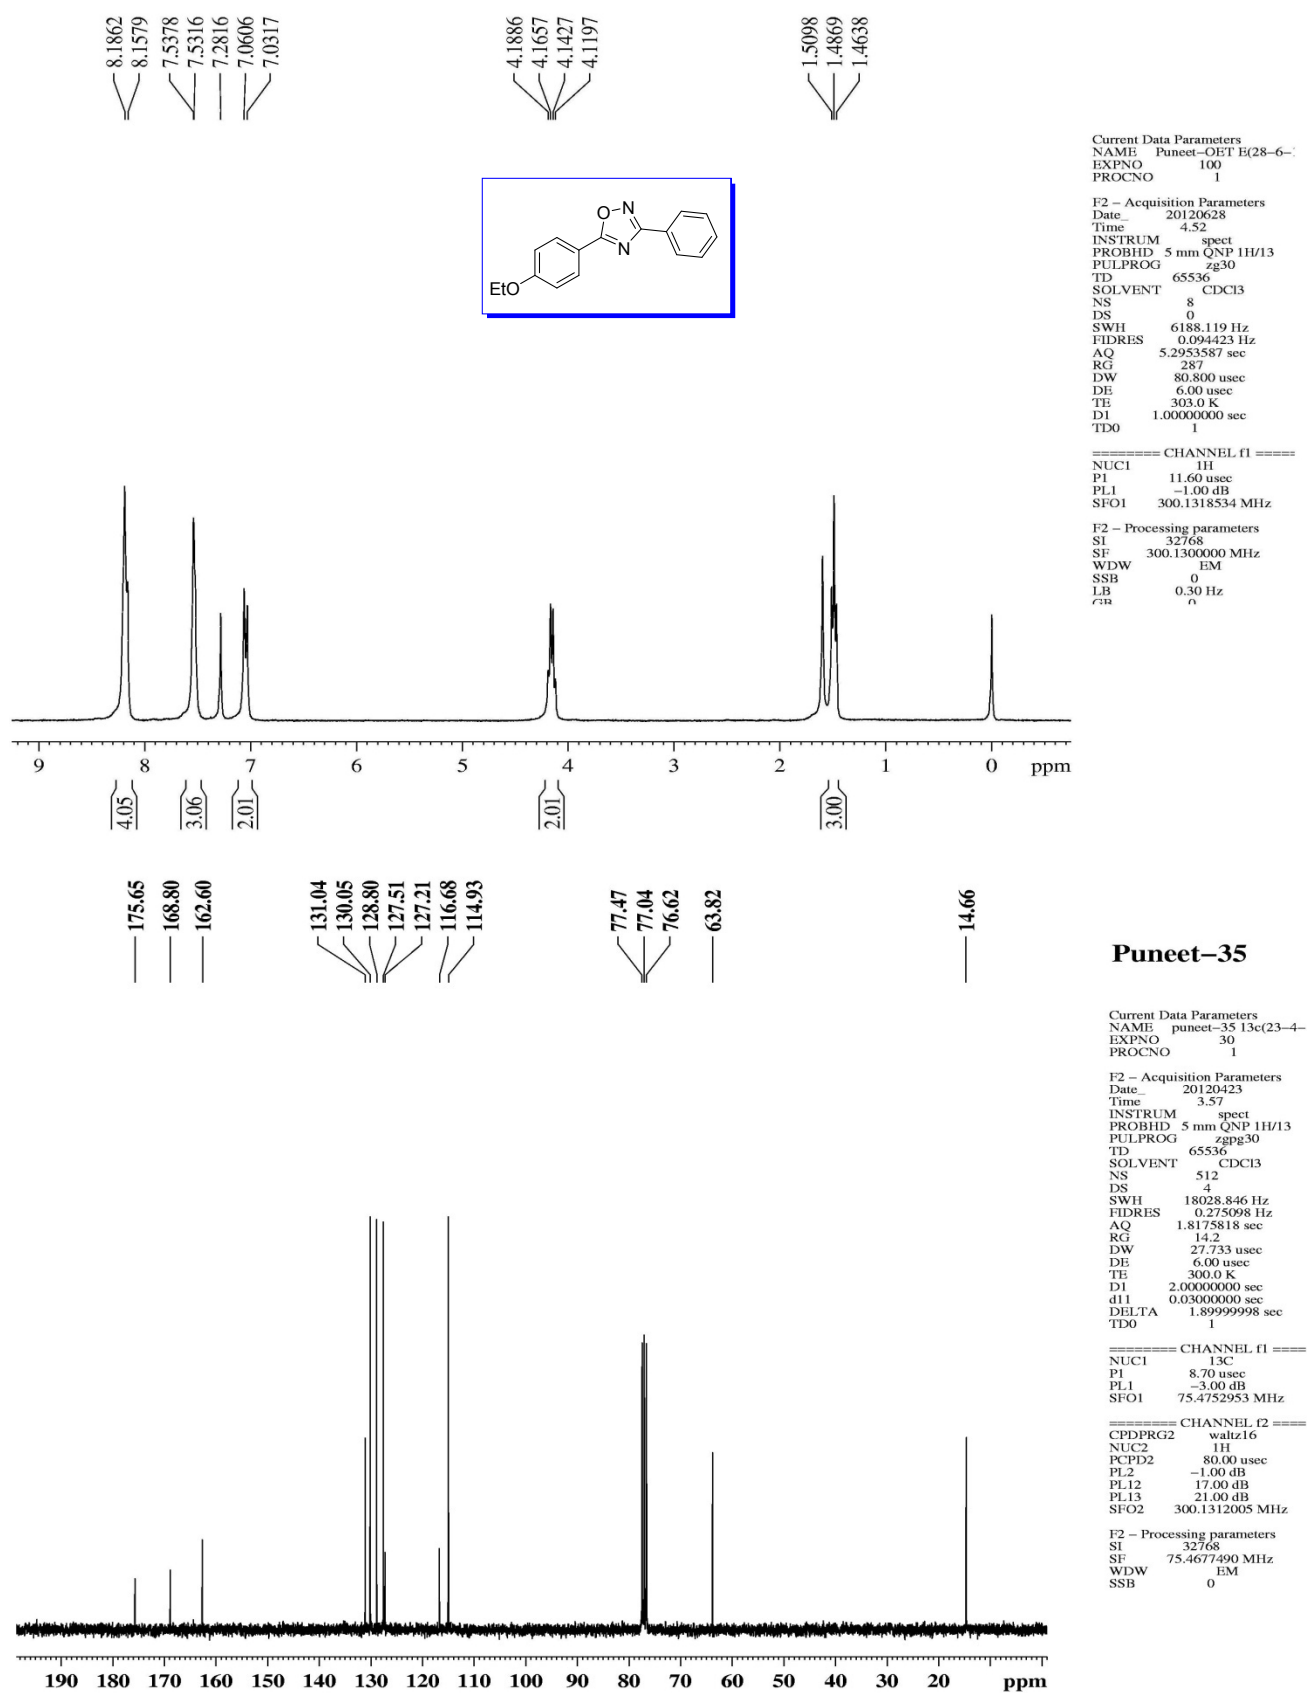

Figure 7:  $^1\text{H}$  and  $^{13}\text{C}$  Spectra of compound 3c

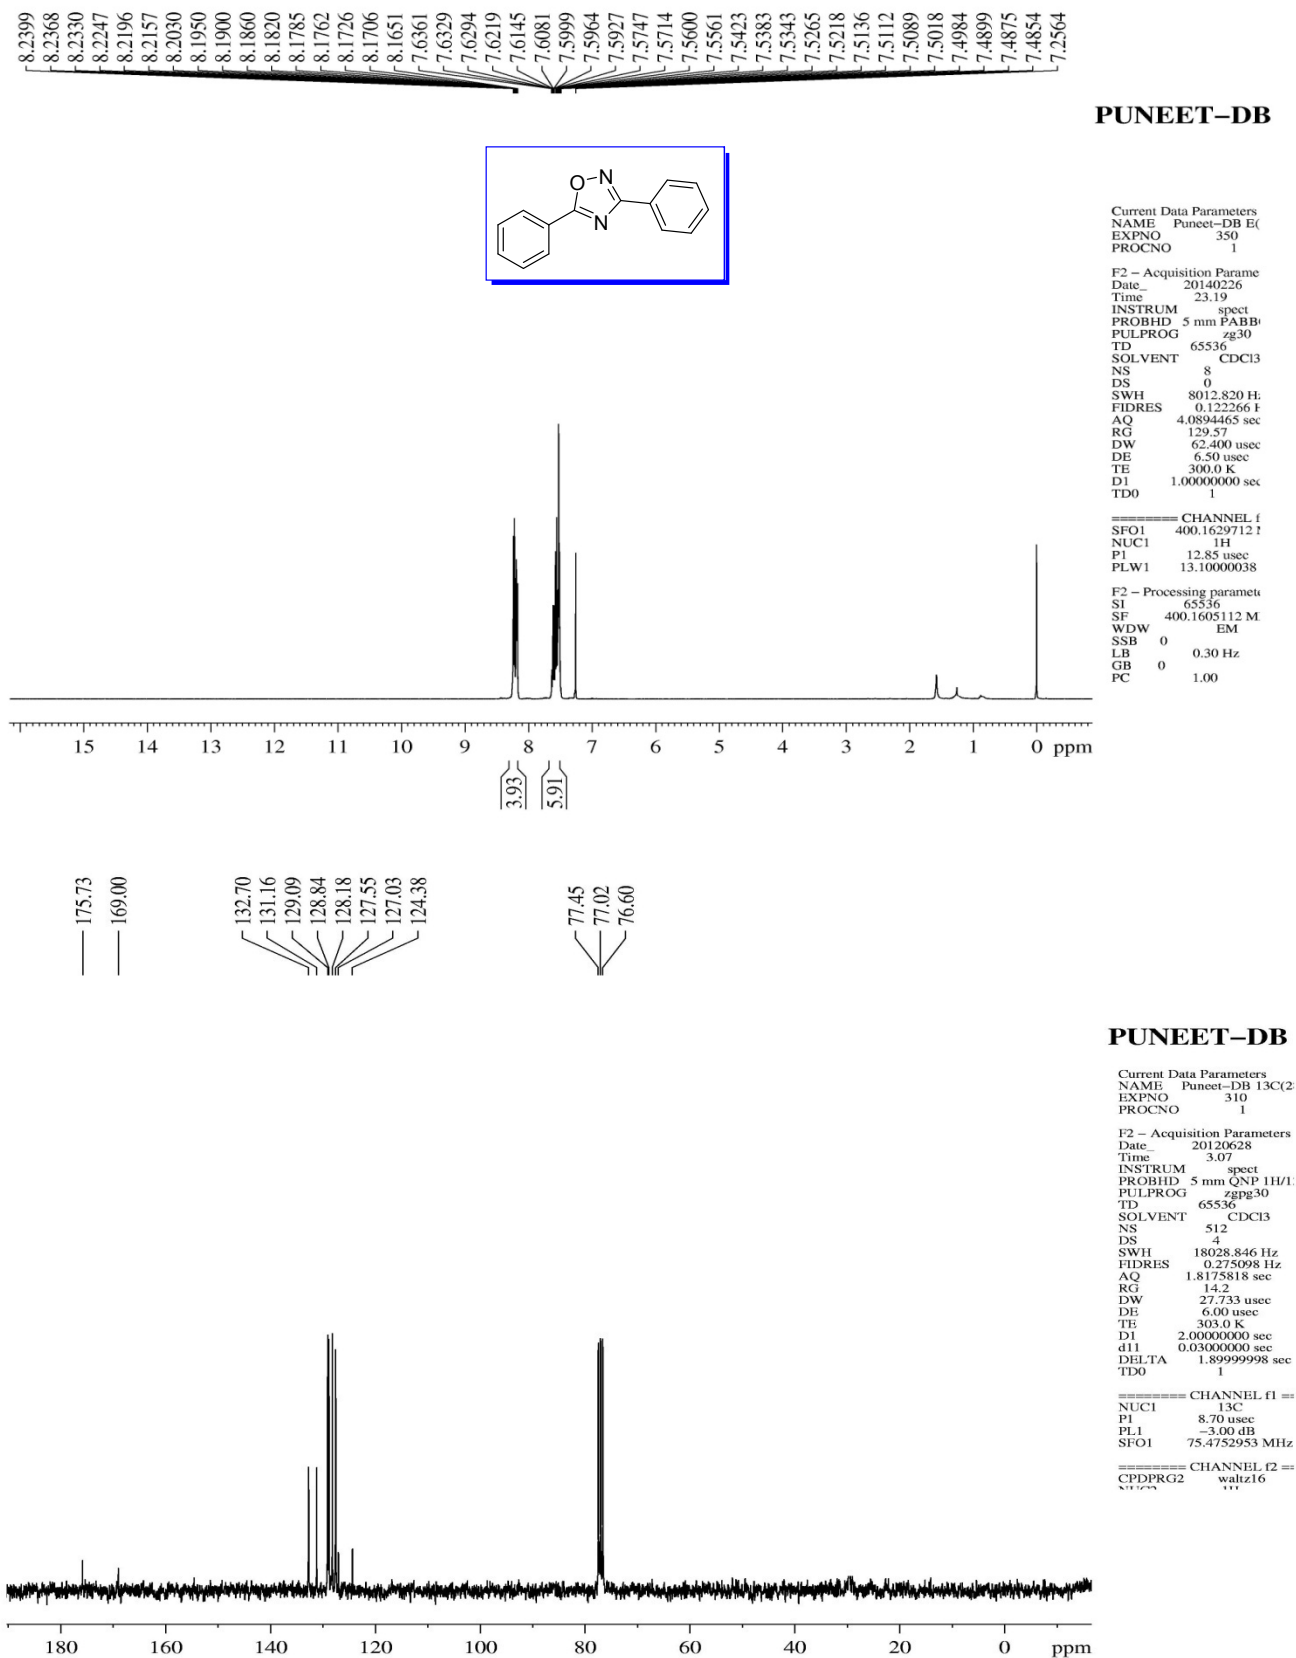

**Figure 8:  $^1\text{H}$  and  $^{13}\text{C}$  Spectra of compound 3d**

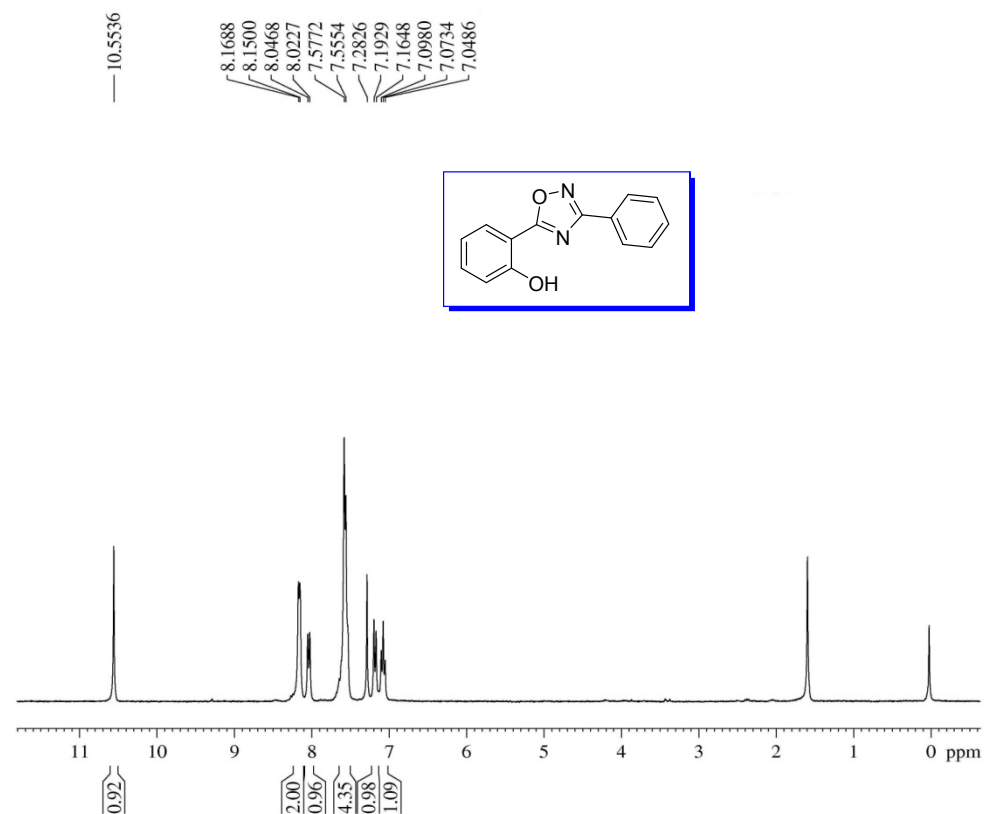

PU-SAO

Current Data Parameters  
NAME PU-SAO  
EXPNO 360  
PROCNO 1

F2 - Acquisition Parameters  
Date\_ 20140216  
Time 8.14  
INSTRUM spect  
PROBHD 5 mm QNP 1H/13  
PULPROG zg30  
TD 65536  
SOLVENT CDCl3  
NS 8  
DS 0  
SWH 6188.119 Hz  
FIDRES 0.094423 Hz  
AQ 5.2953086 sec  
RG 256  
DW 80.800 usec  
DE 6.00 usec  
TE 297.5 K  
D1 1.00000000 sec  
TD0 1

===== CHANNEL f1 =====  
NUC1 1H  
P1 11.60 usec  
PL1 -1.00 dB  
SFO1 300.1318534 MHz

F2 - Processing parameters  
SI 32768  
SF 300.1300000 MHz  
WDW EM  
SSB 0  
LB 0.30 Hz  
GB 0  
PC 1.00

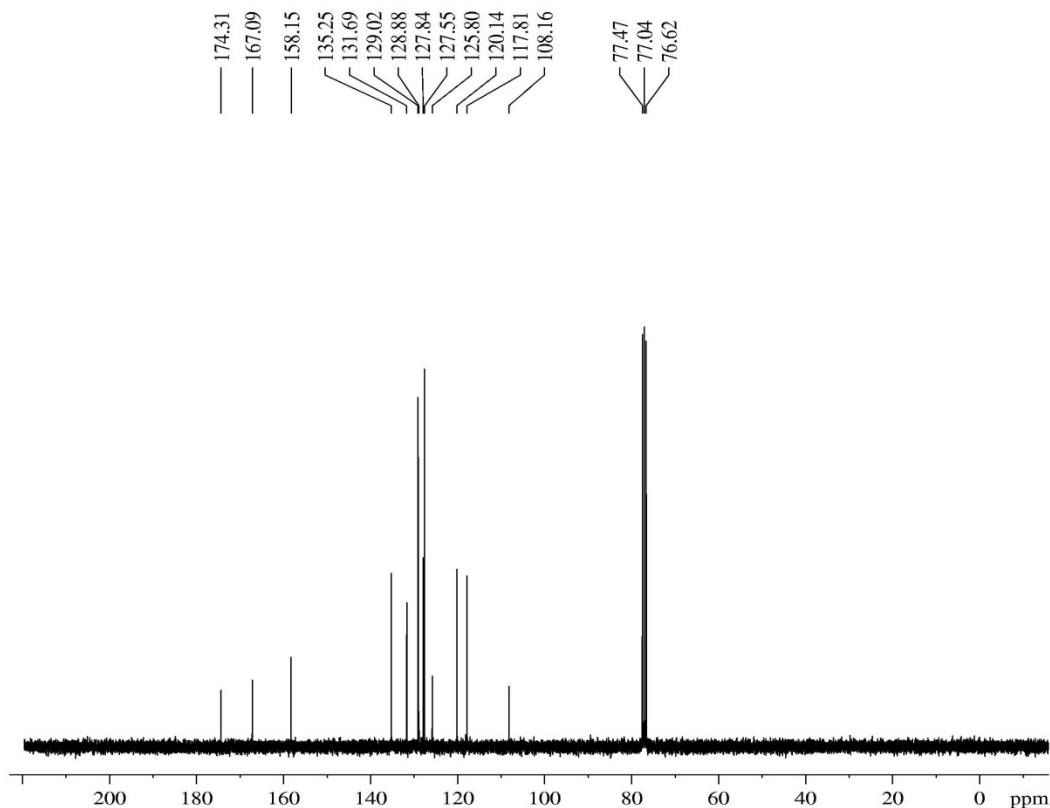

PUNEET-SAO

Current Data Parameters  
NAME Puneet-SAO N 13C(7  
EXPNO 30  
PROCNO 1

F2 - Acquisition Parameters  
Date\_ 20130206  
Time 22.53  
INSTRUM spect  
PROBHD 5 mm QNP 1H/13  
PULPROG zgpg30  
TD 65536  
SOLVENT CDCl3  
NS 512  
DS 0  
SWH 18028.846 Hz  
FIDRES 0.275098 Hz  
AQ 1.8175818 sec  
RG 2050  
DW 27.733 usec  
DE 15.00 usec  
TE 673.2 K  
D1 2.00000000 sec  
D11 0.03000000 sec  
TD0 1

===== CHANNEL f1 =====  
NUC1 13C  
P1 8.15 usec  
PL1 -3.00 dB  
PL1W 55.13059616 W  
SFO1 75.4752953 MHz

===== CHANNEL f2 =====  
CPDPRG2 waltz16  
NUC2 1H  
PCPD2 80.00 usec  
PL2 -1.00 dB  
PL12 17.06 dB  
PL13 21.00 dB  
PL2W 15.02081871 W  
PL12W 0.23479761 W  
PL13W 0.00477406 W

Figure 9:  $^1\text{H}$  and  $^{13}\text{C}$  Spectra of compound 3e

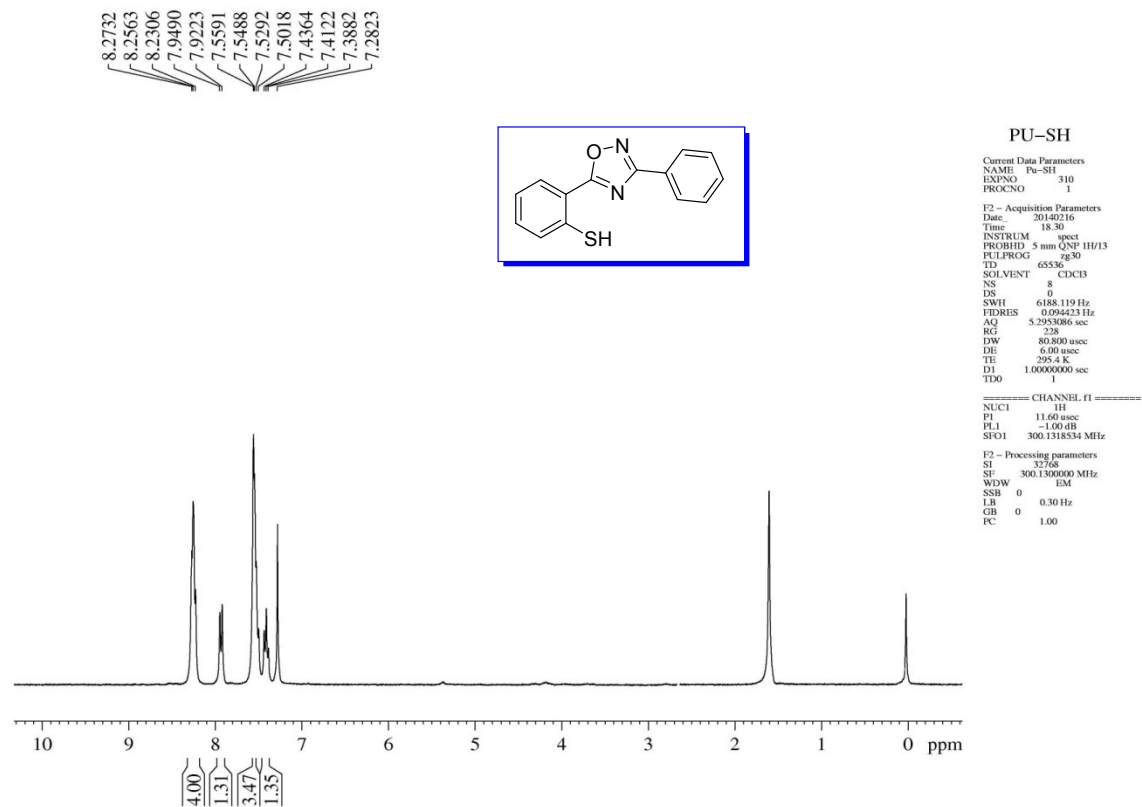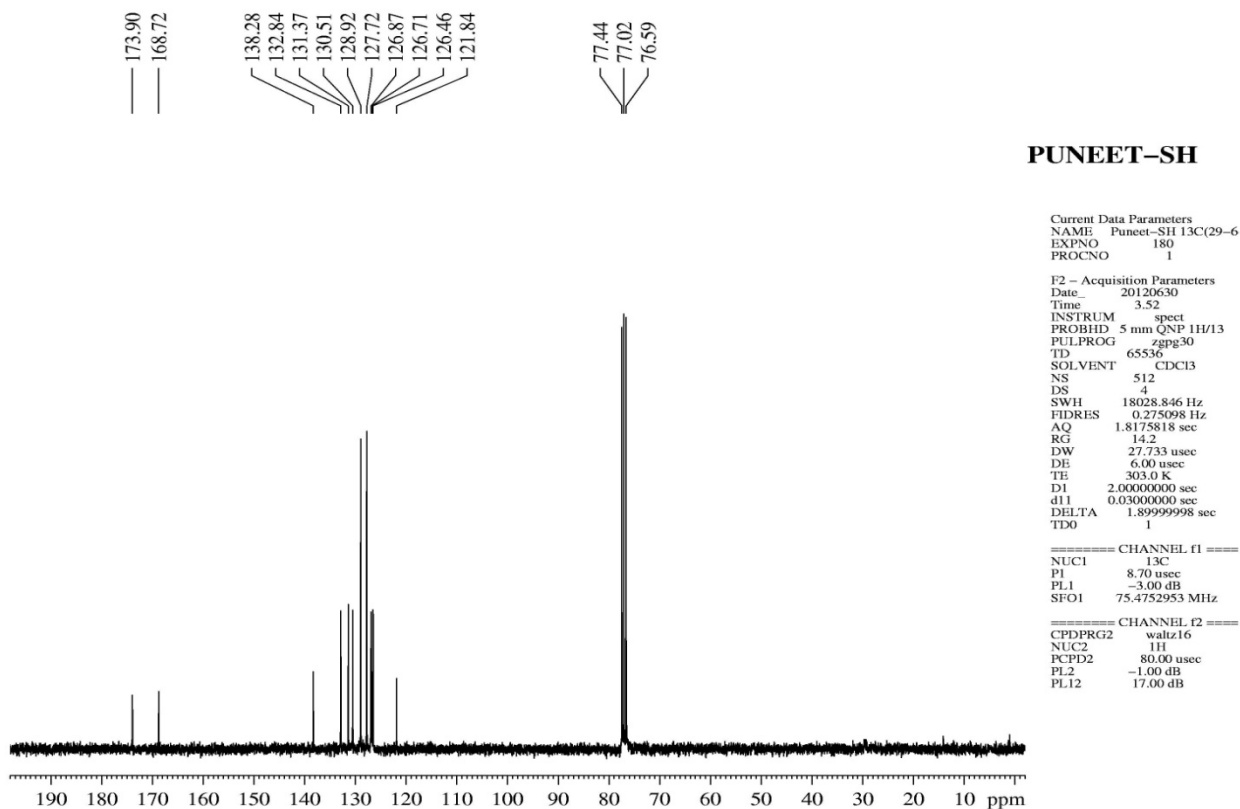

Figure 10: <sup>1</sup>H and <sup>13</sup>C Spectra of compound 3f

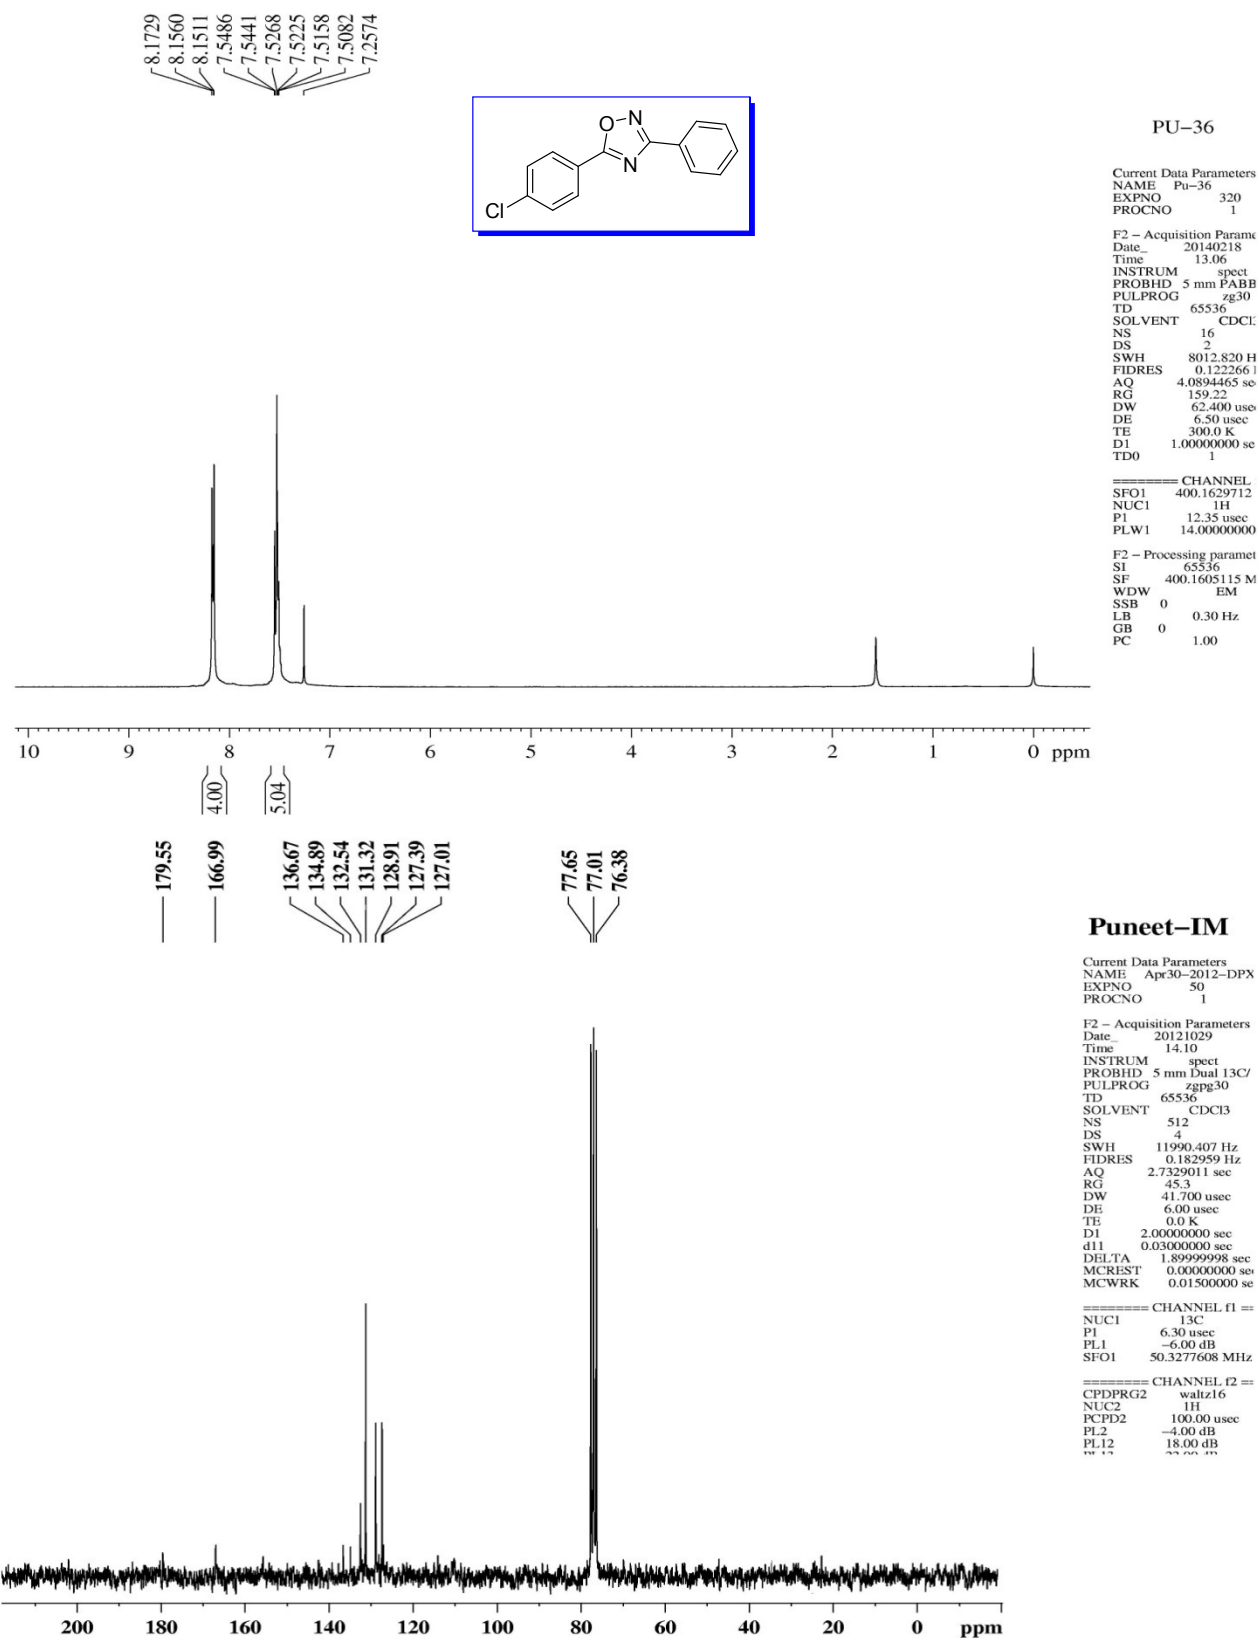

Figure11: <sup>1</sup>H and <sup>13</sup>C Spectra of compound 3g



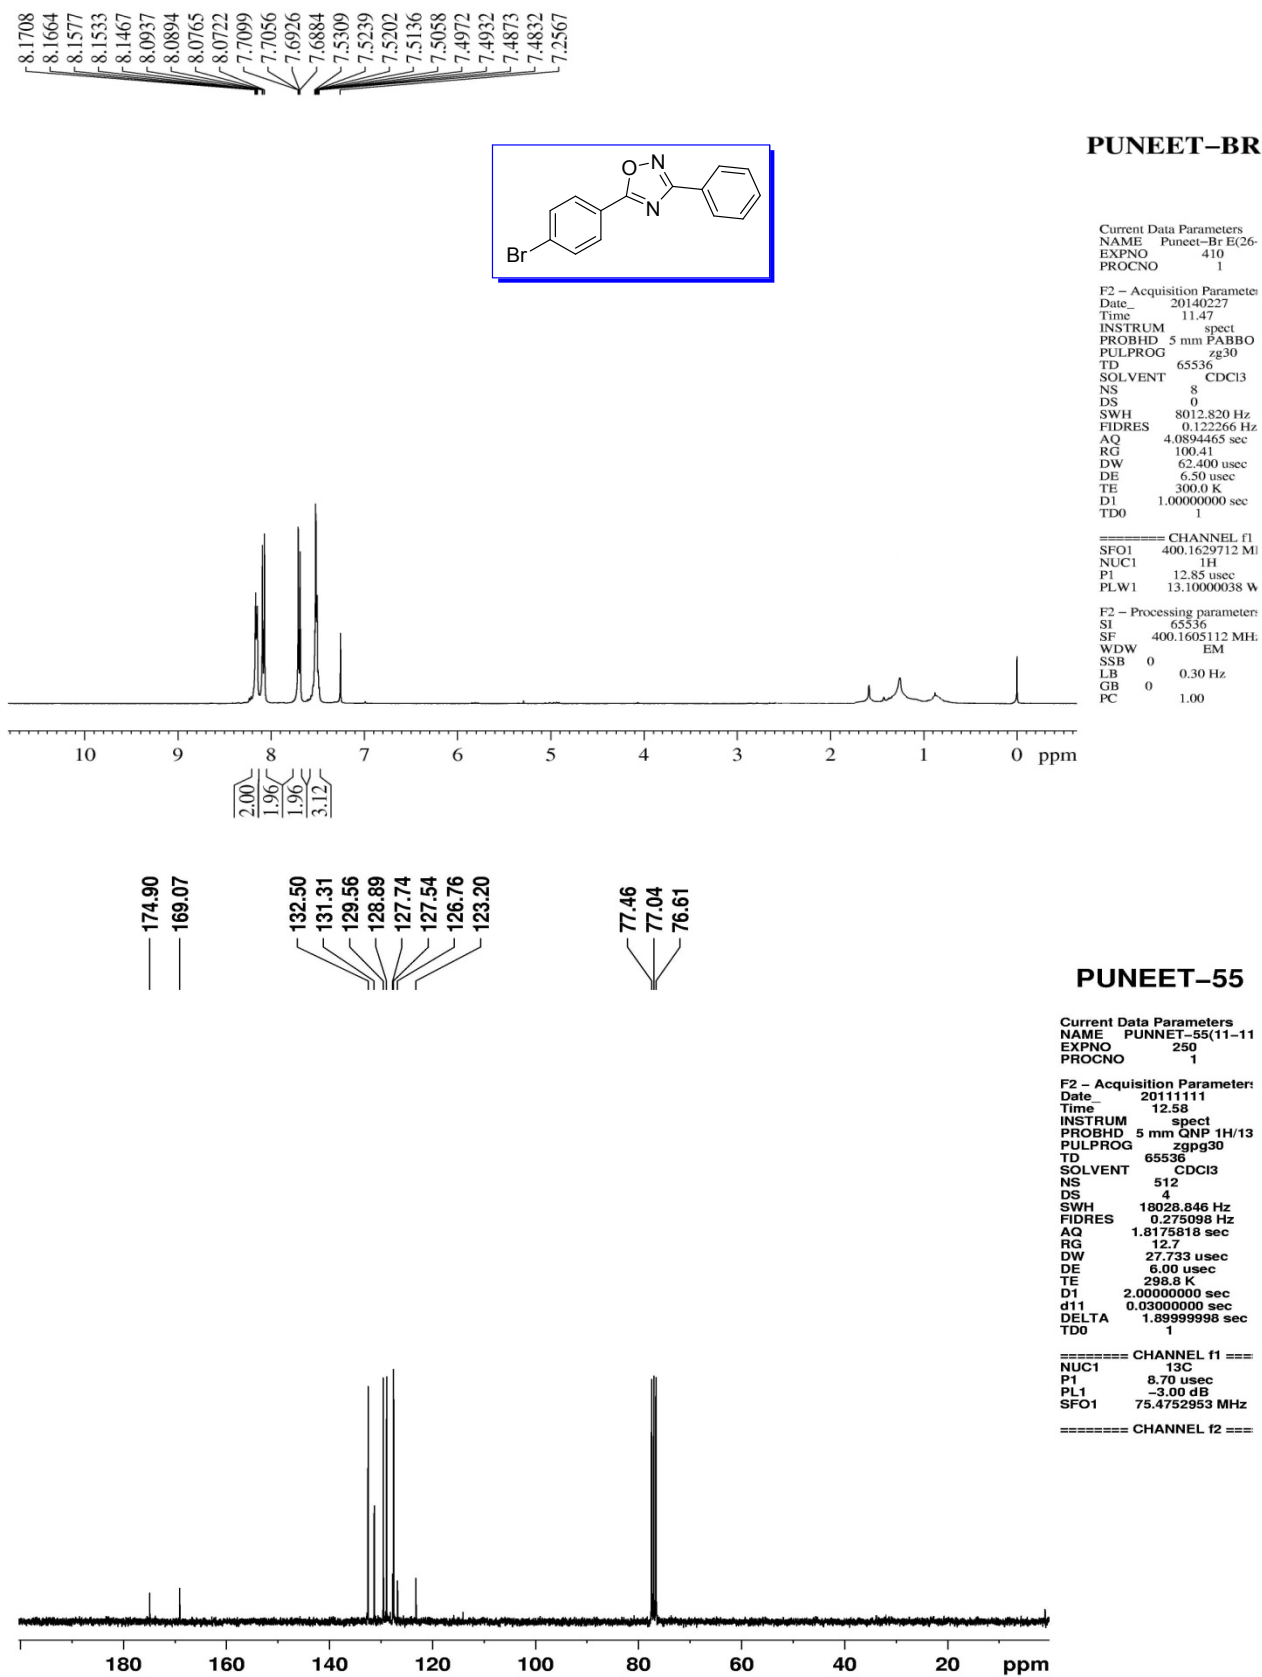

Figure 12:  $^1\text{H}$  and  $^{13}\text{C}$  Spectra of compound 3h

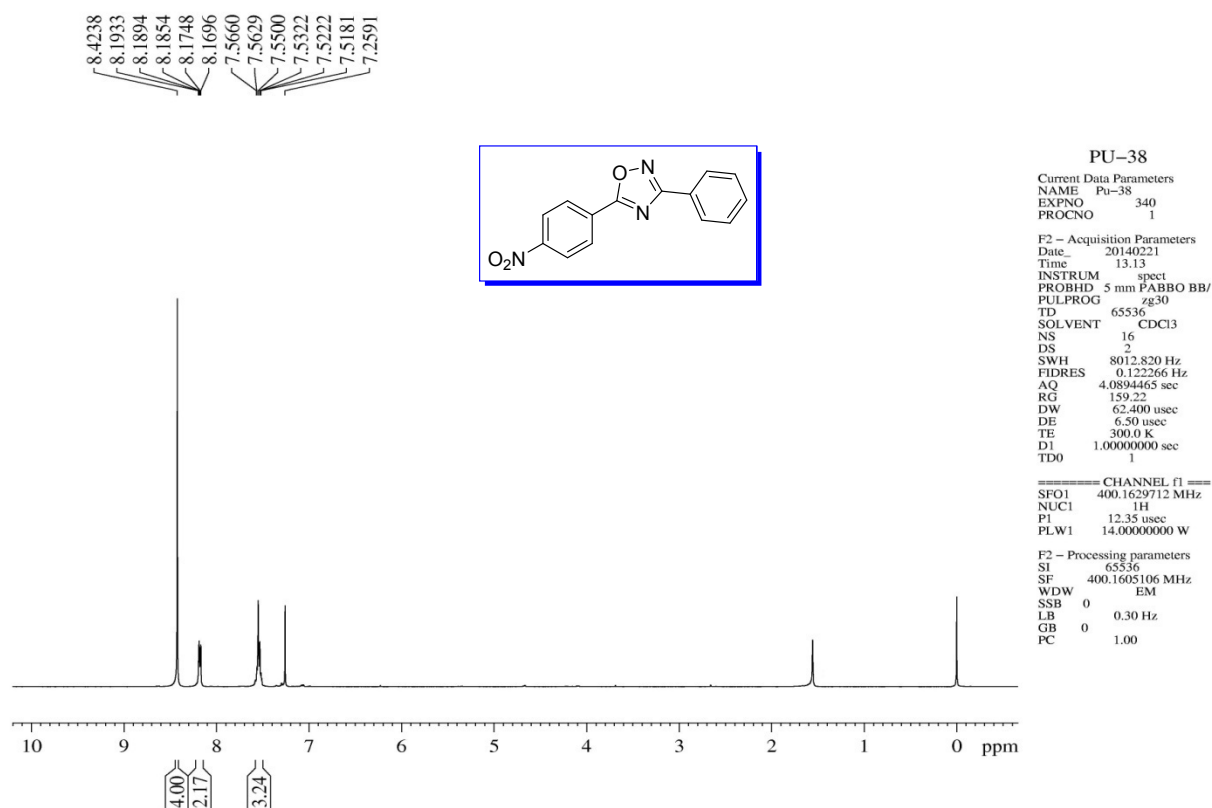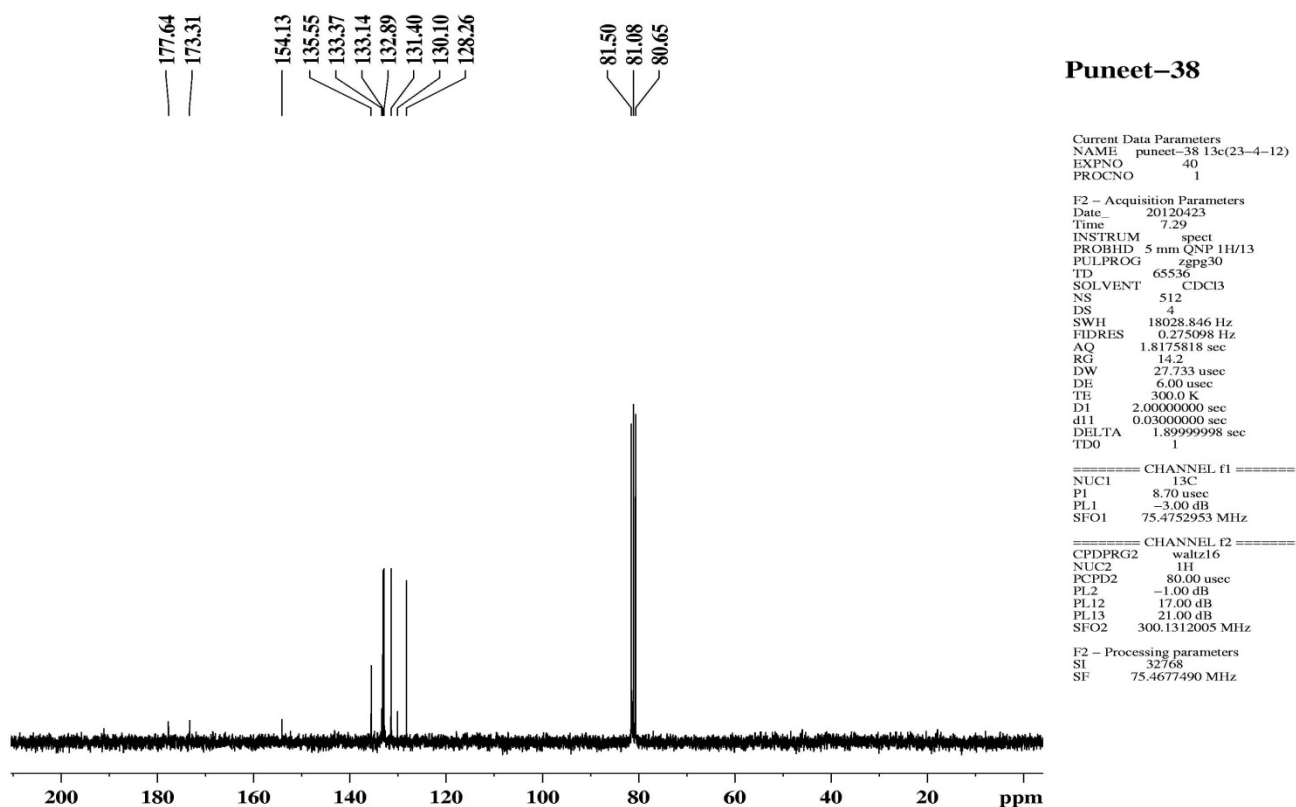

Figure 13:  $^1\text{H}$  and  $^{13}\text{C}$  Spectra of compound 3i

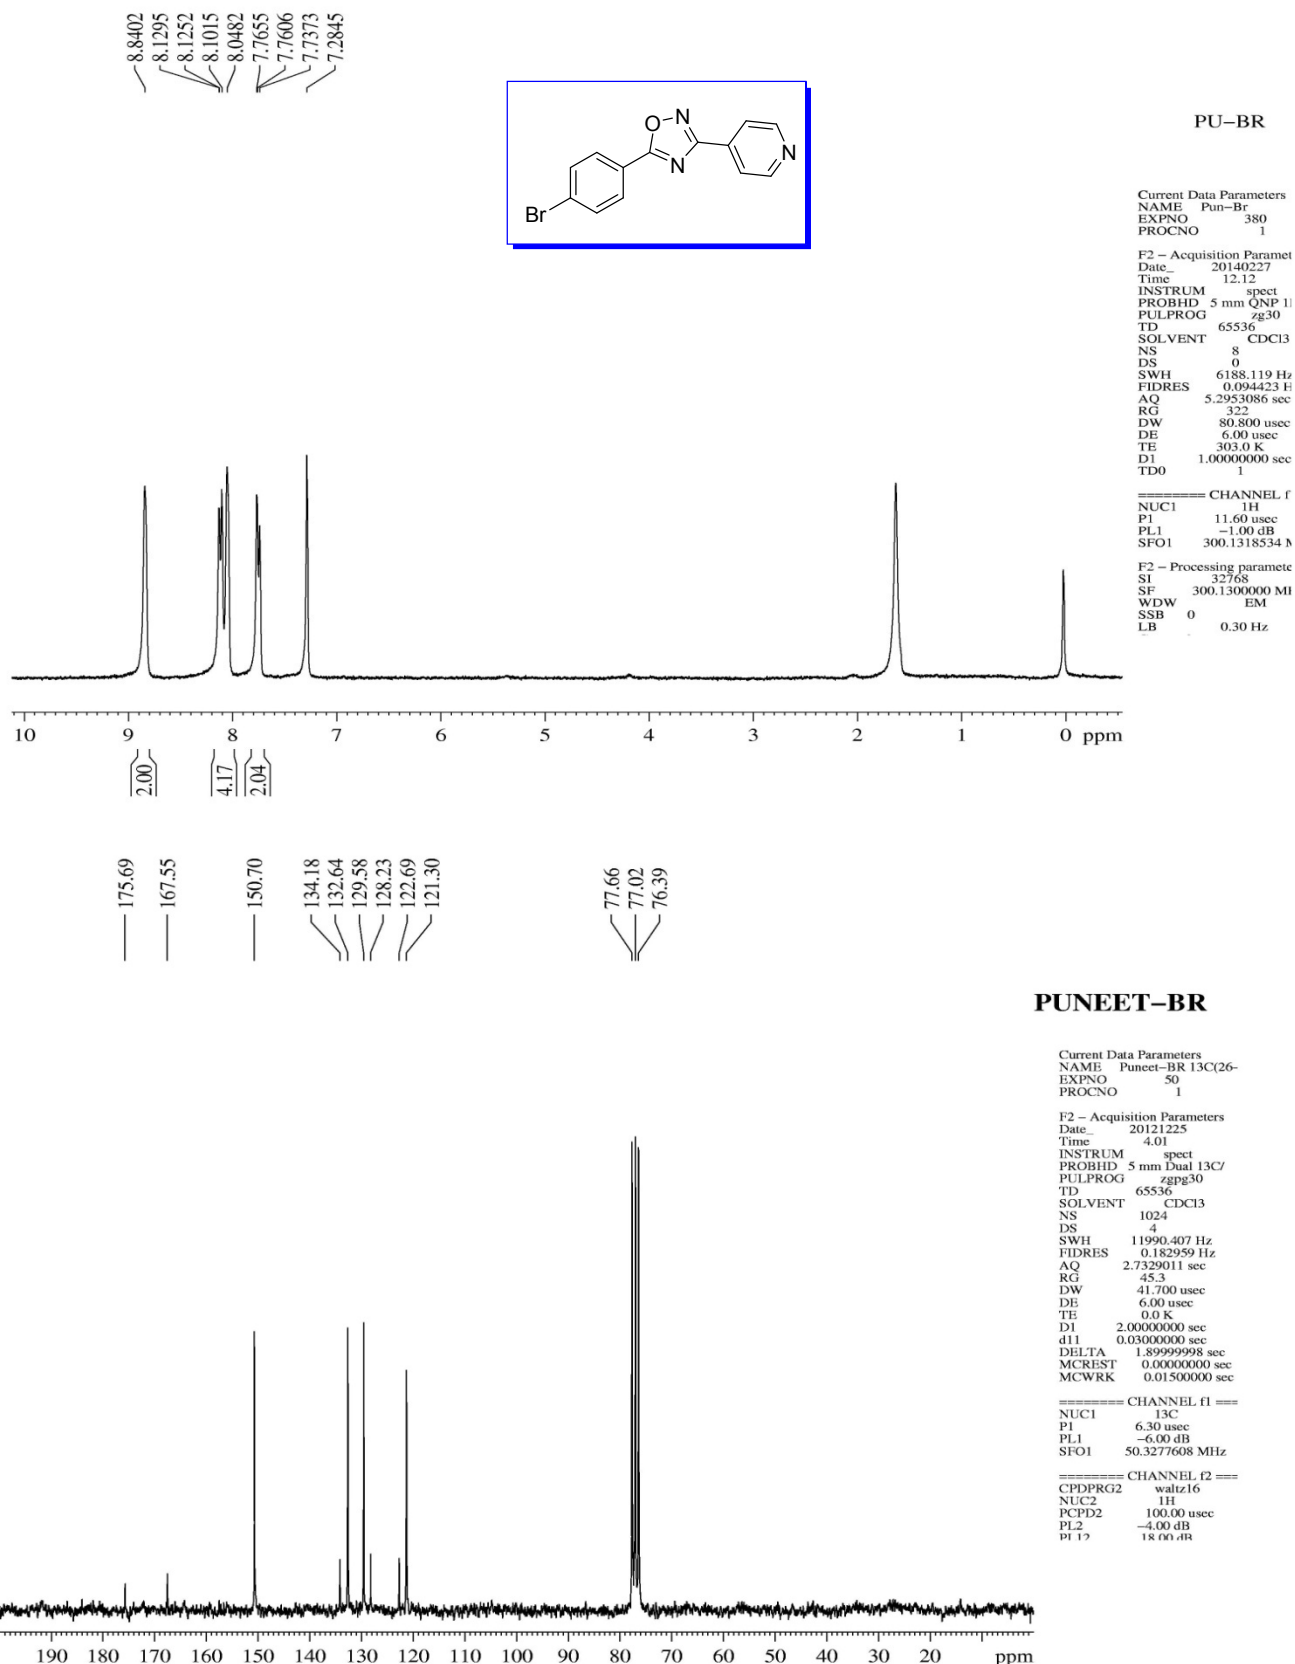

**Figure 14:  $^1\text{H}$  and  $^{13}\text{C}$  Spectra of compound 3j**

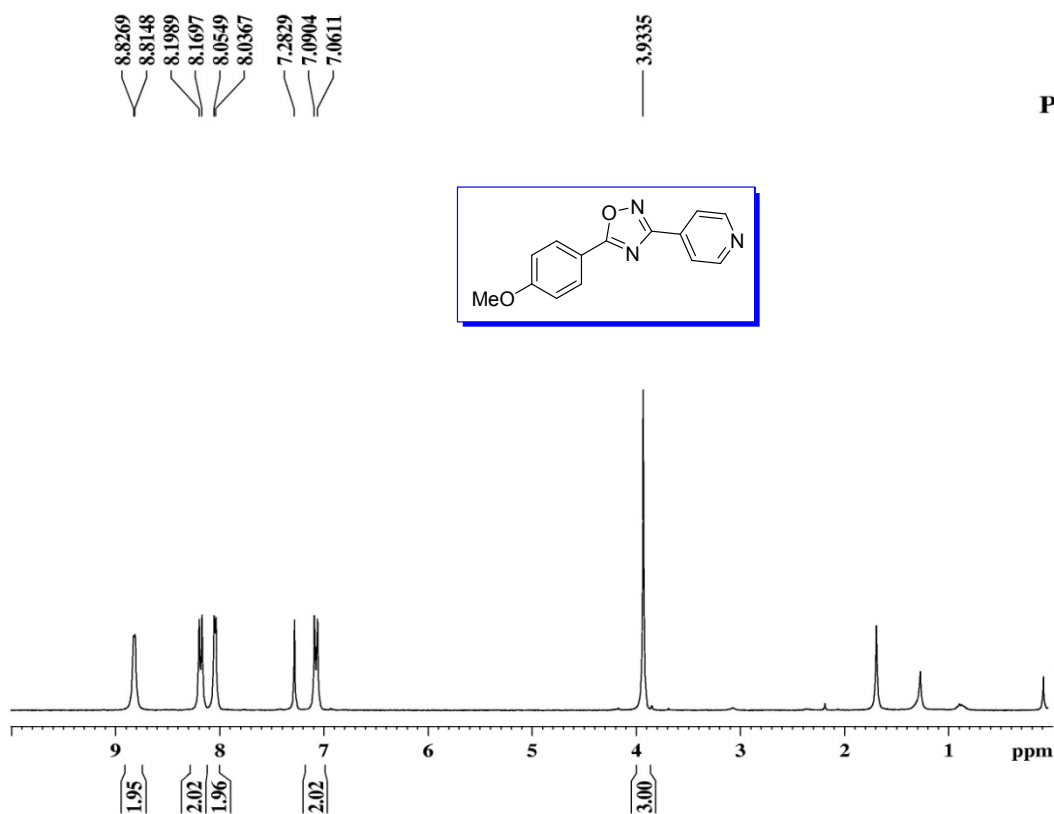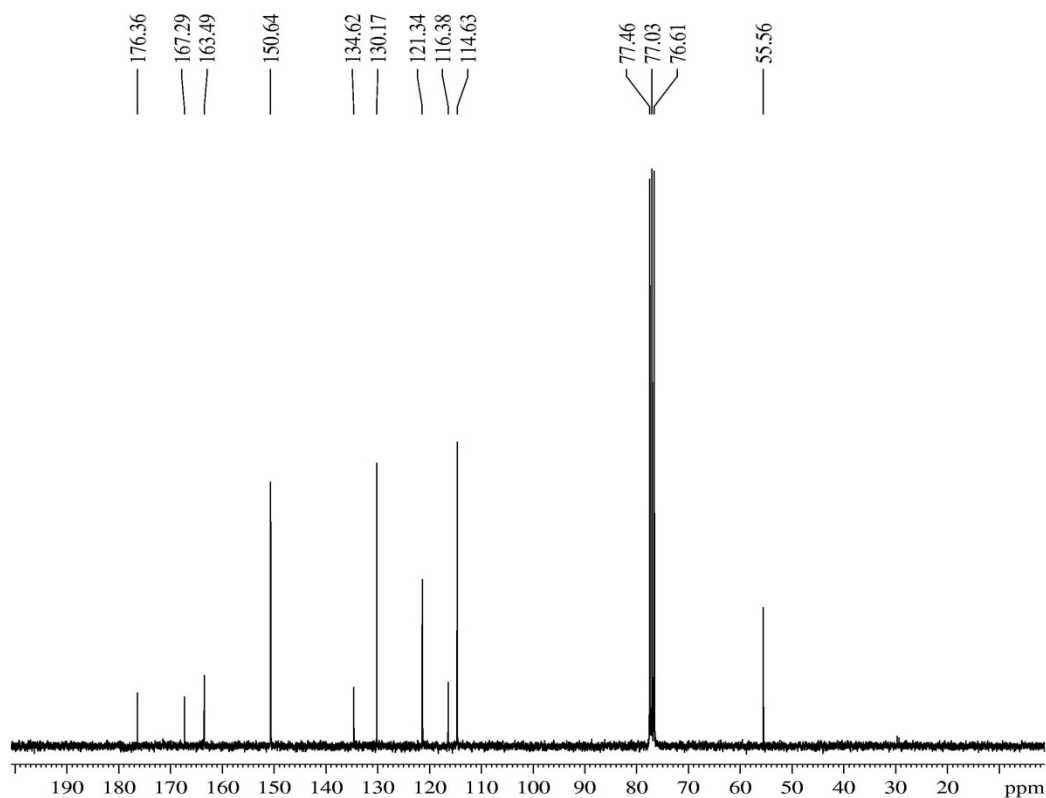

Figure 15: <sup>1</sup>H and <sup>13</sup>C Spectra of compound 3k

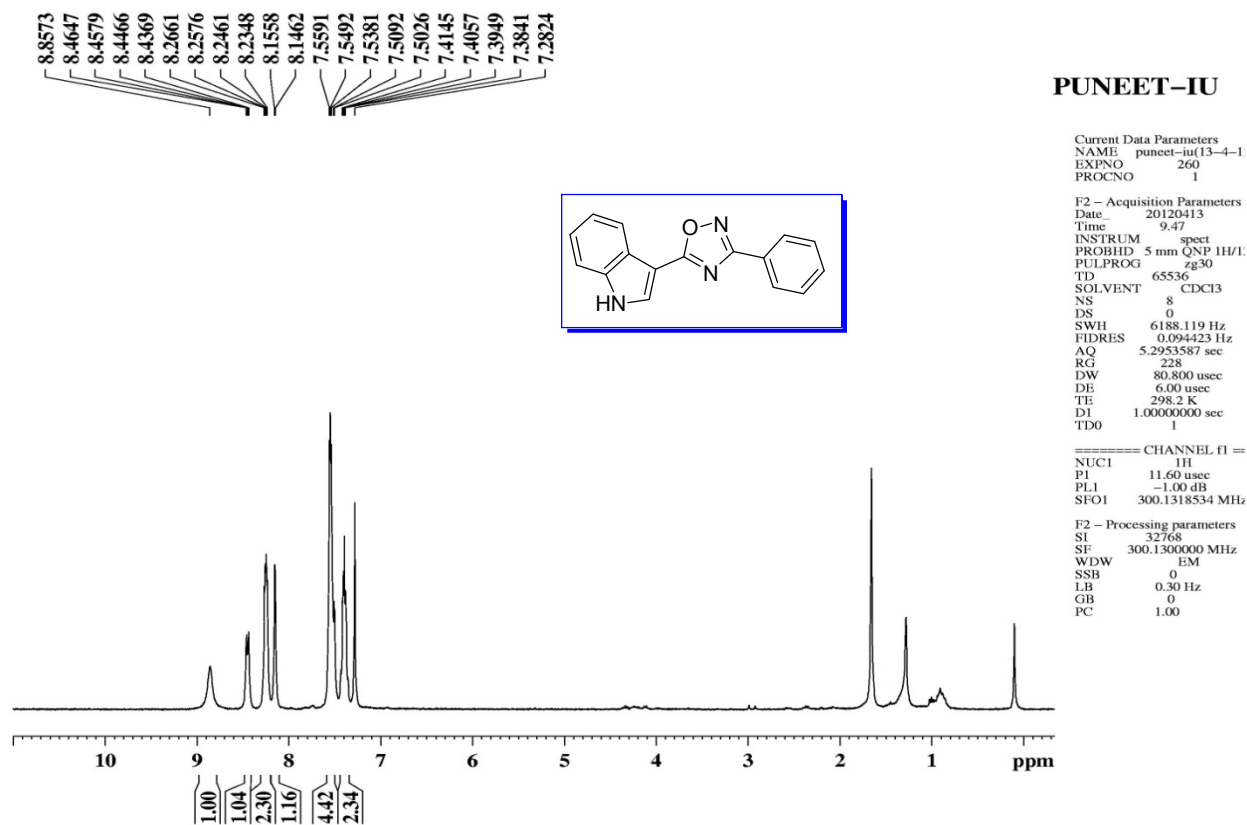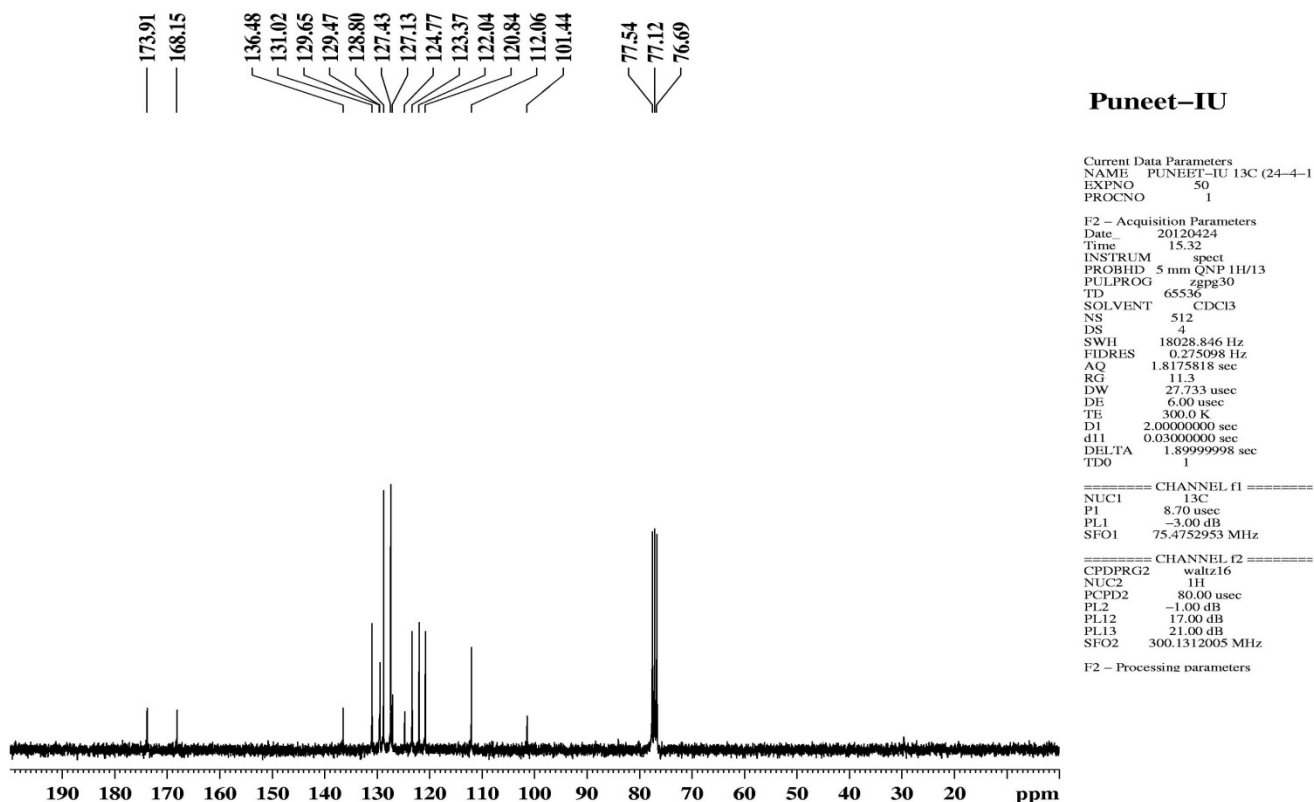

Figure 16: <sup>1</sup>H and <sup>13</sup>C Spectra of compound 31

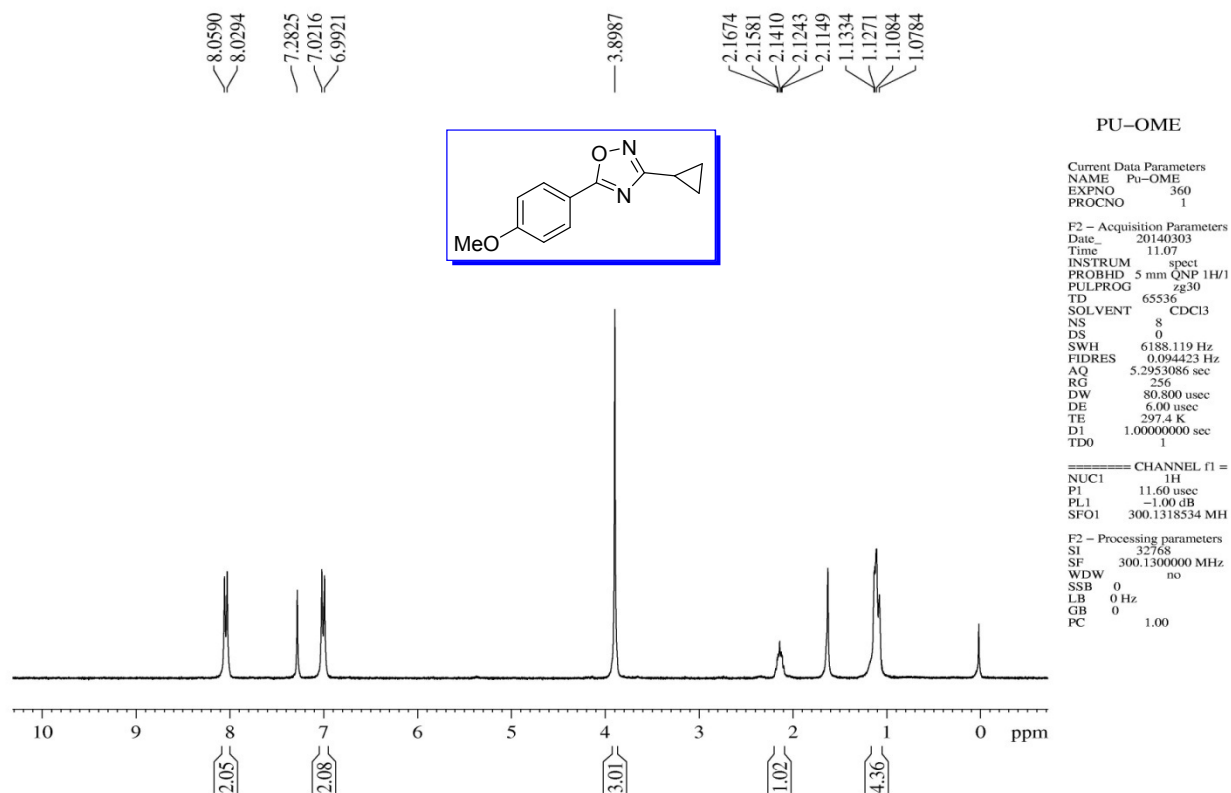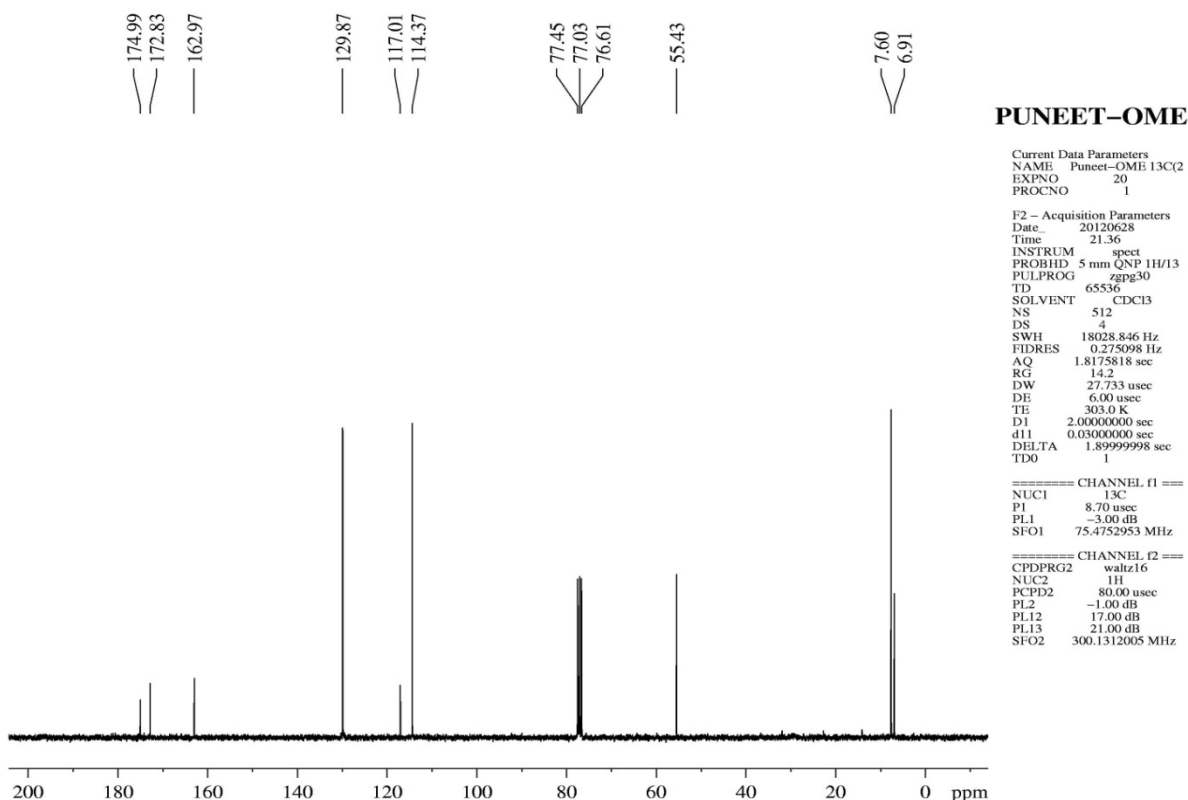

Figure 17:  $^1\text{H}$  and  $^{13}\text{C}$  Spectra of compound 3m

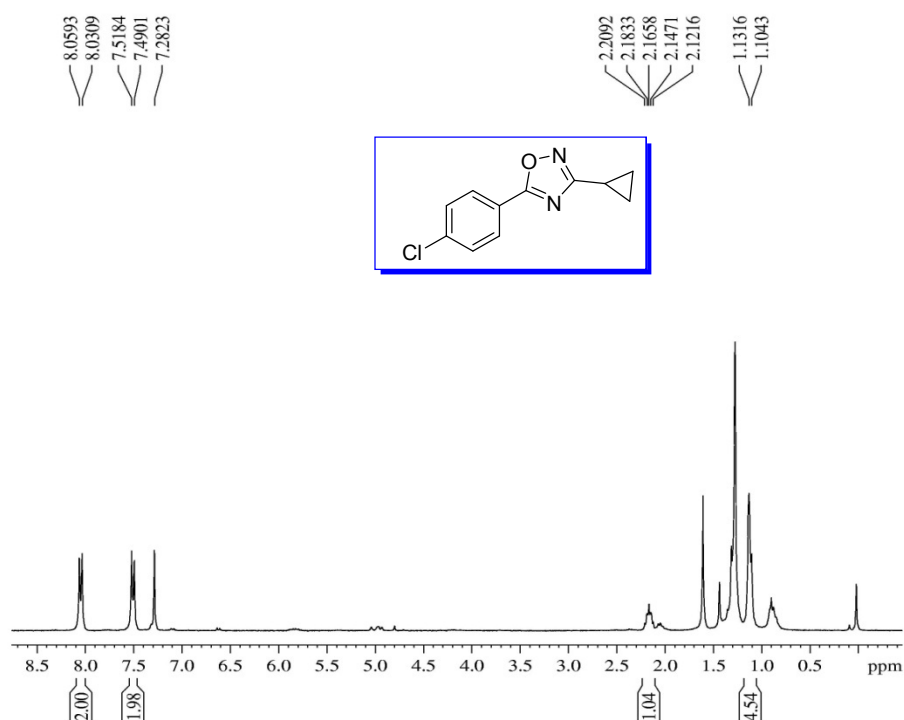

### PUNEET-CL

Current Data Parameters  
 NAME Puneet-CL26-6-12  
 EXPNO 60  
 PROCNO 1  
 F2 - Acquisition Parameters  
 Date\_ 20120625  
 Time 22.57  
 INSTRUM spect  
 PROBHD 5 mm QNP 1H/13  
 PULPROG zg30  
 TD 65536  
 SOLVENT CDCl3  
 NS 8  
 DS 0  
 SWH 6188.119 Hz  
 FIDRES 0.094423 Hz  
 AQ 5.2953587 sec  
 RG 256  
 DW 80.800 usec  
 DE 6.00 usec  
 TE 297.5 K  
 D1 1.00000000 sec  
 TDO 1  
 ===== CHANNEL f1 =====  
 NUC1 1H  
 P1 11.60 usec  
 PL1 -1.00 dB  
 SFO1 300.1318534 MHz  
 F2 - Processing parameters  
 SI 32768  
 SF 300.1300000 MHz  
 WDW EM  
 SSB 0  
 GB 0

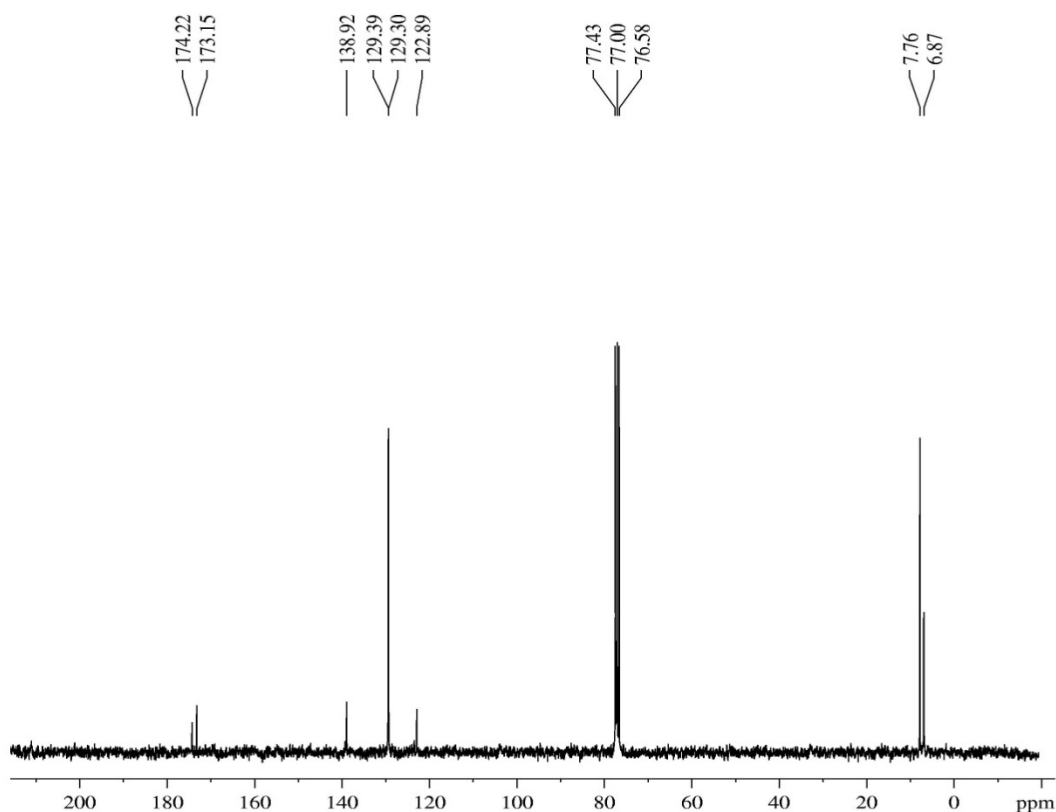

### PUNEET-CL

Current Data Parameters  
 NAME Puneet-CL 13C(28-4  
 EXPNO 30  
 PROCNO 1  
 F2 - Acquisition Parameters  
 Date\_ 20120628  
 Time 21.49  
 INSTRUM spect  
 PROBHD 5 mm QNP 1H/13  
 PULPROG zgpg30  
 TD 65536  
 SOLVENT CDCl3  
 NS 512  
 DS 4  
 SWH 18028.846 Hz  
 FIDRES 0.275098 Hz  
 AQ 1.8175818 sec  
 RG 14.2  
 DW 27.733 usec  
 DE 6.00 usec  
 TE 303.0 K  
 D1 2.00000000 sec  
 d11 0.03000000 sec  
 DELTA 1.89999998 sec  
 TDO 1  
 ===== CHANNEL f1 =====  
 NUC1 13C  
 P1 8.70 usec  
 PL1 -3.00 dB  
 SFO1 75.4752953 MHz  
 ===== CHANNEL f2 =====  
 CPDPRG2 waltz16  
 NUC2 1H  
 PCPD2 80.00 usec

Figure 18: <sup>1</sup>H and <sup>13</sup>C Spectra of compound 3n

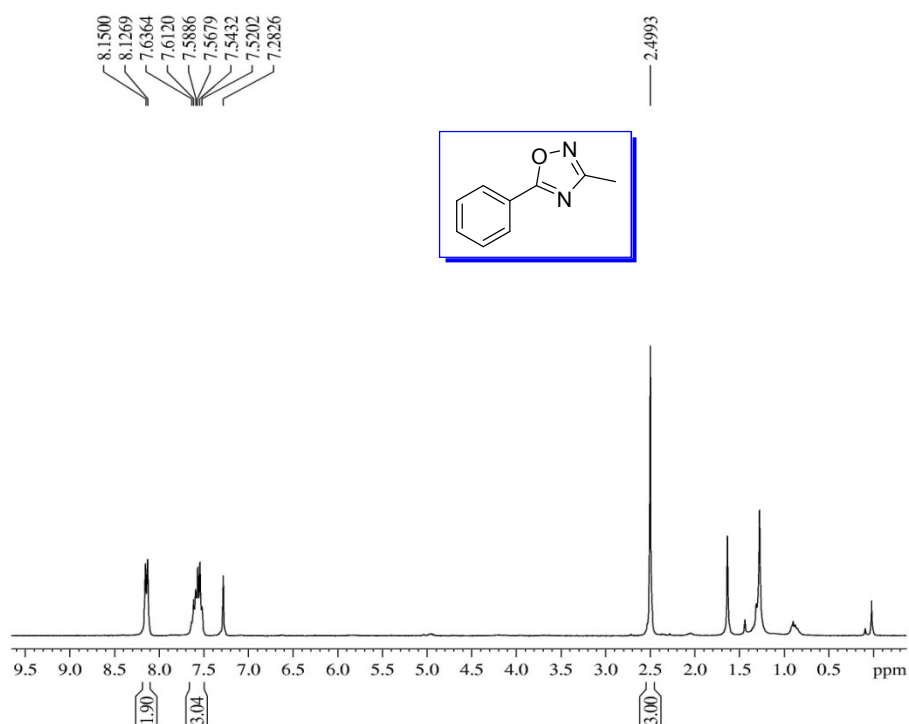

### PUNEET-AB

Current Data Parameters  
NAME Puneet-AB(26-6-12)  
EXPNO 50  
PROCNO 1

F2 - Acquisition Parameters  
Date\_ 20120625  
Time 22.50  
INSTRUM spect  
PROBHD 5 mm QNP 1H/13  
PULPROG zg30  
TD 65536  
SOLVENT CDCl3  
NS 8  
DS 0  
SWH 6188.119 Hz  
FIDRES 0.094423 Hz  
AQ 5.2953587 sec  
RG 256  
DW 80.800 usec  
DE 6.00 usec  
TE 297.5 K  
D1 1.00000000 sec  
TD0

===== CHANNEL f1 =====  
NUC1 1H  
P1 11.60 usec  
PL1 -1.00 dB  
SFO1 300.1318534 MHz

F2 - Processing parameters  
SI 32768  
SF 300.1300000 MHz

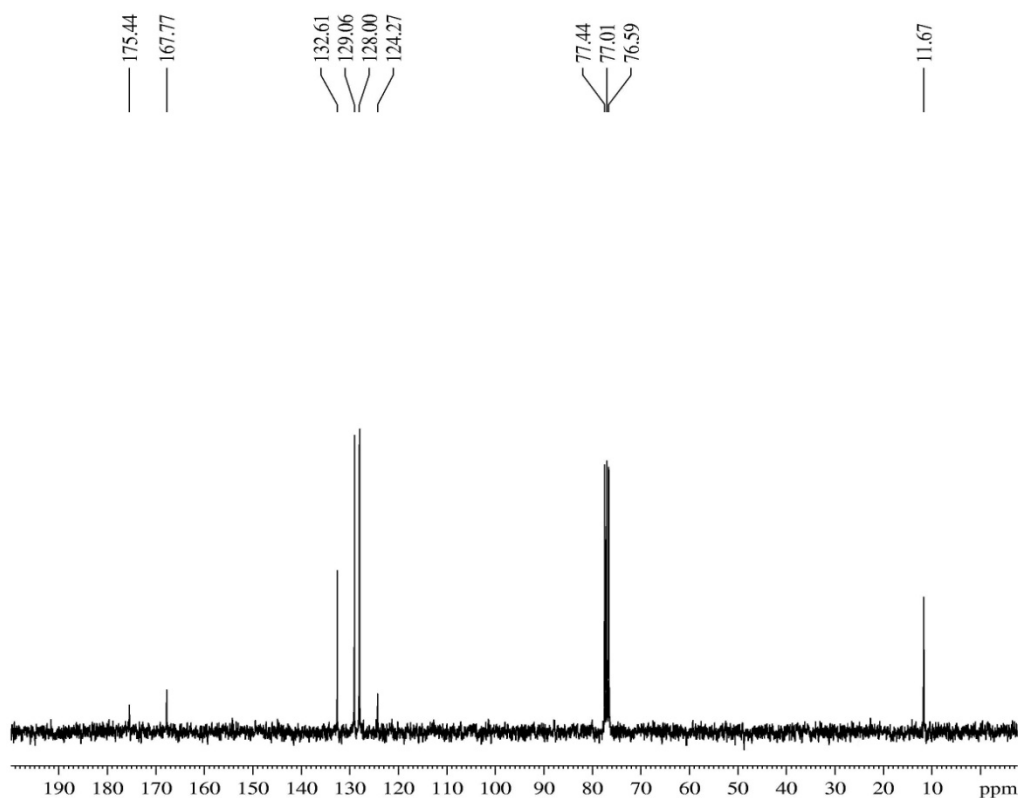

### PUNEET-AB

Current Data Parameters  
NAME Puneet-AB 13C(28-6-1  
EXPNO 320  
PROCNO 1

F2 - Acquisition Parameters  
Date\_ 20120628  
Time 3.25  
INSTRUM spect  
PROBHD 5 mm QNP 1H/13  
PULPROG zgpg30  
TD 65536  
SOLVENT CDCl3  
NS 512  
DS 4  
SWH 18028.846 Hz  
FIDRES 0.275098 Hz  
AQ 1.8175818 sec  
RG 14.2  
DW 27.733 usec  
DE 6.00 usec  
TE 303.0 K  
D1 2.00000000 sec  
d11 0.05000000 sec  
DELTA 1.89999998 sec  
TD0 1

===== CHANNEL f1 =====  
NUC1 13C  
P1 8.70 usec  
PL1 -3.00 dB  
SFO1 75.4752953 MHz

===== CHANNEL f2 =====  
CPDPRG2 waltz16  
NUC2 1H  
PCPD2 80.00 usec  
PL2 -1.00 dB  
PL12 17.00 dB  
PL13 21.00 dB

Figure 19: <sup>1</sup>H and <sup>13</sup>C Spectra of compound 3o



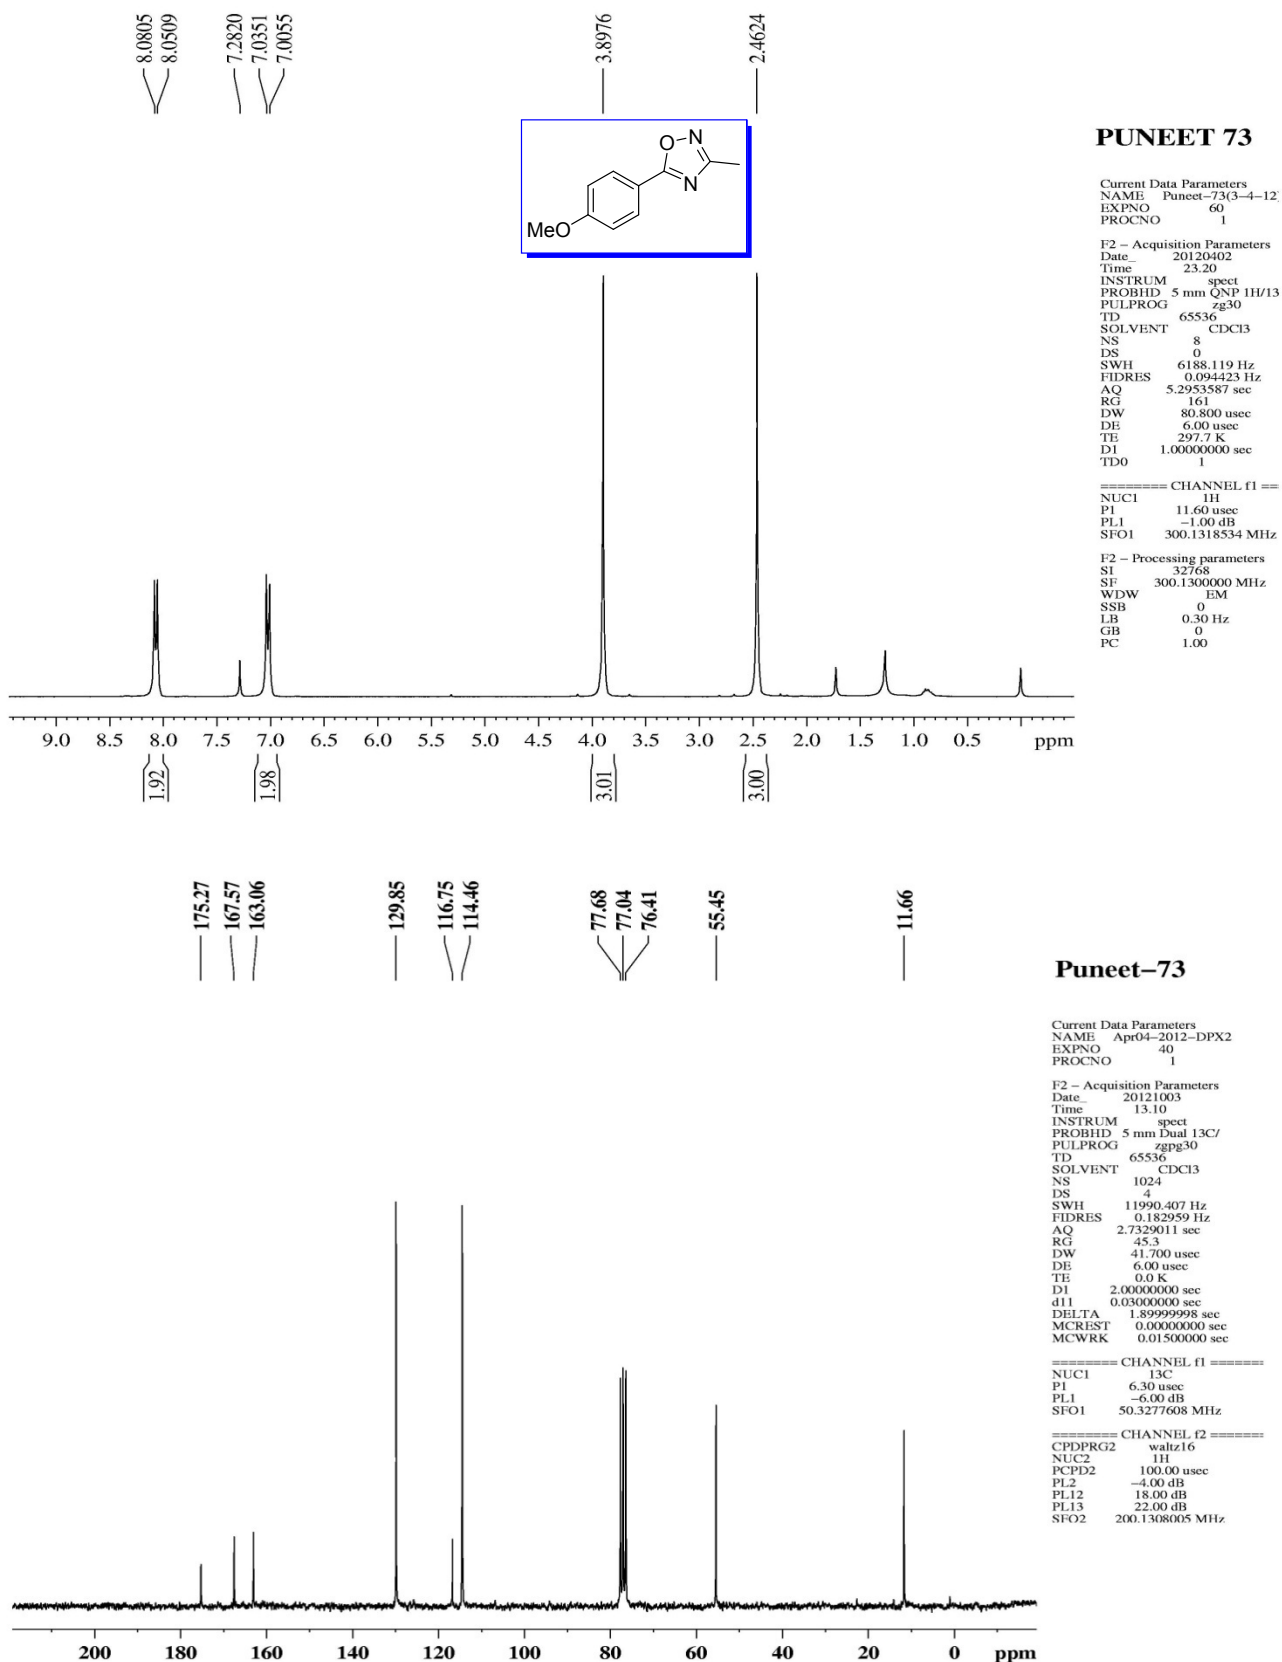

Figure 20: <sup>1</sup>H and <sup>13</sup>C Spectra of compound 3p

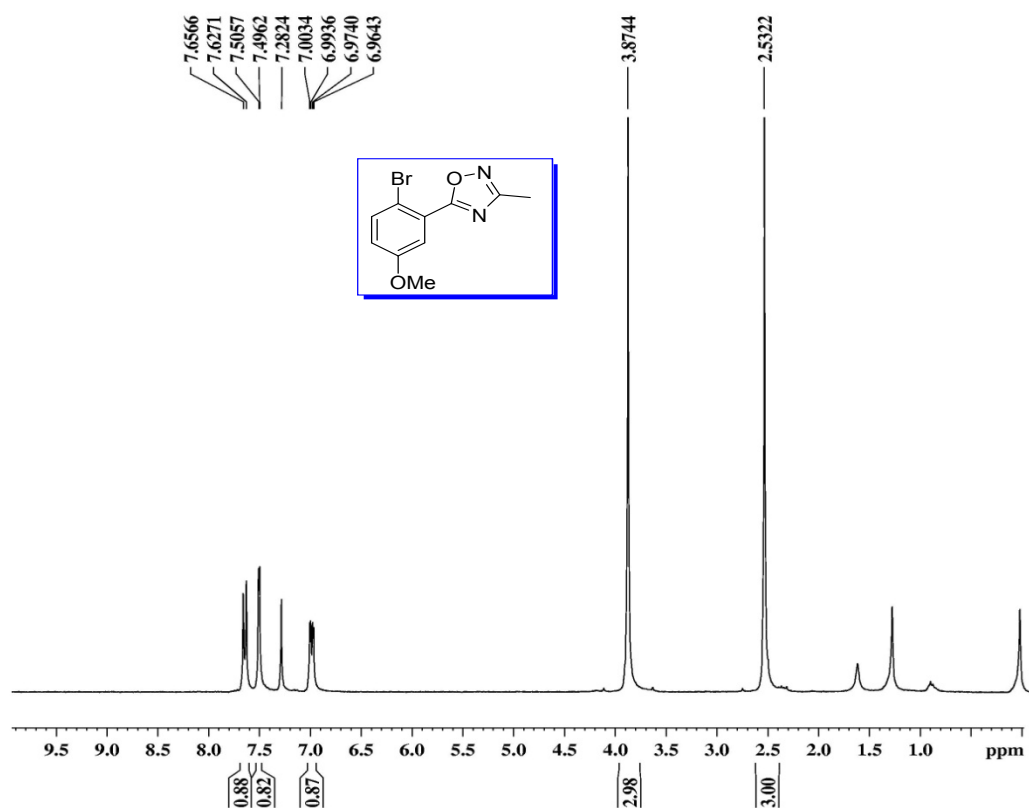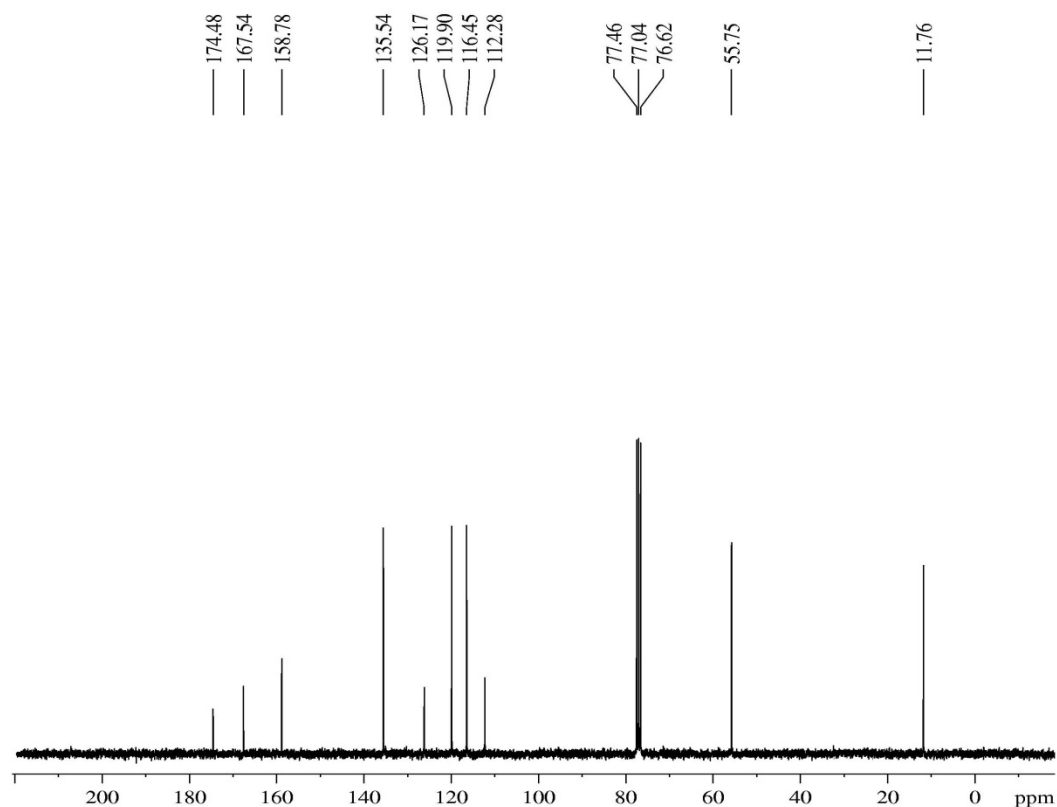

Figure 21:  $^1\text{H}$  and  $^{13}\text{C}$  Spectra of compound 3q

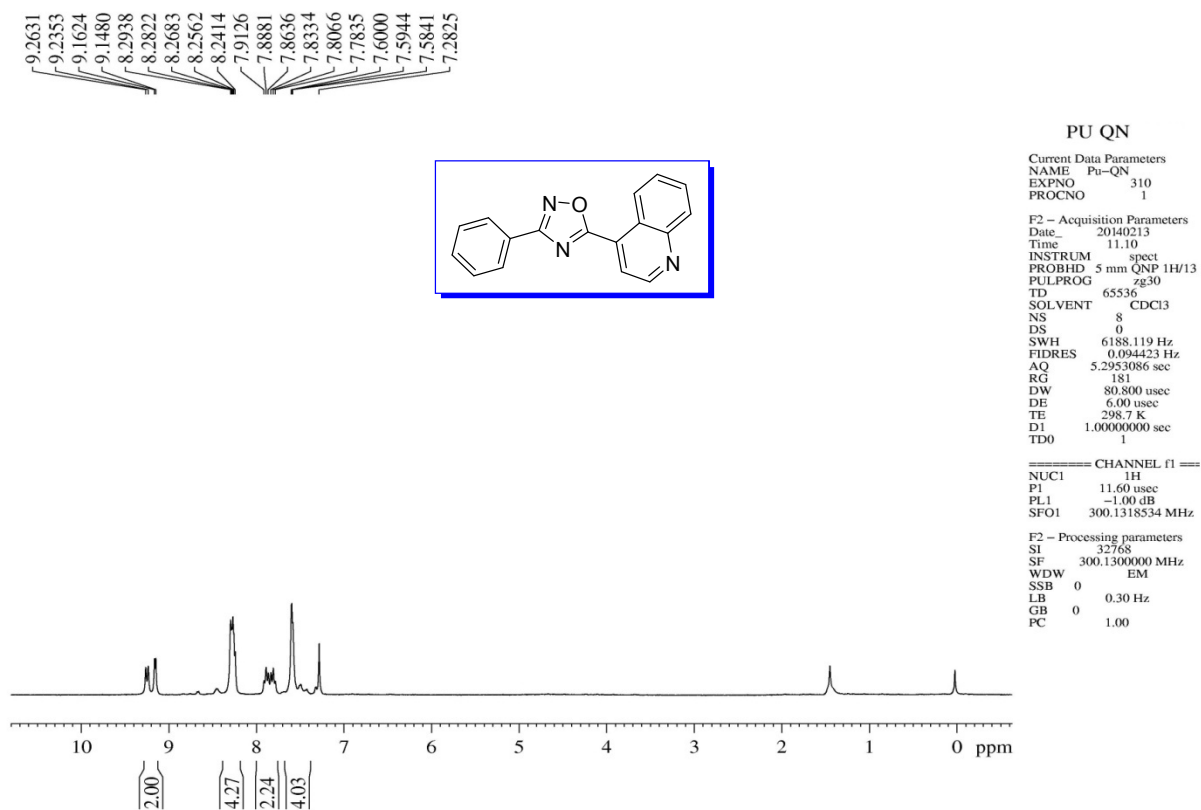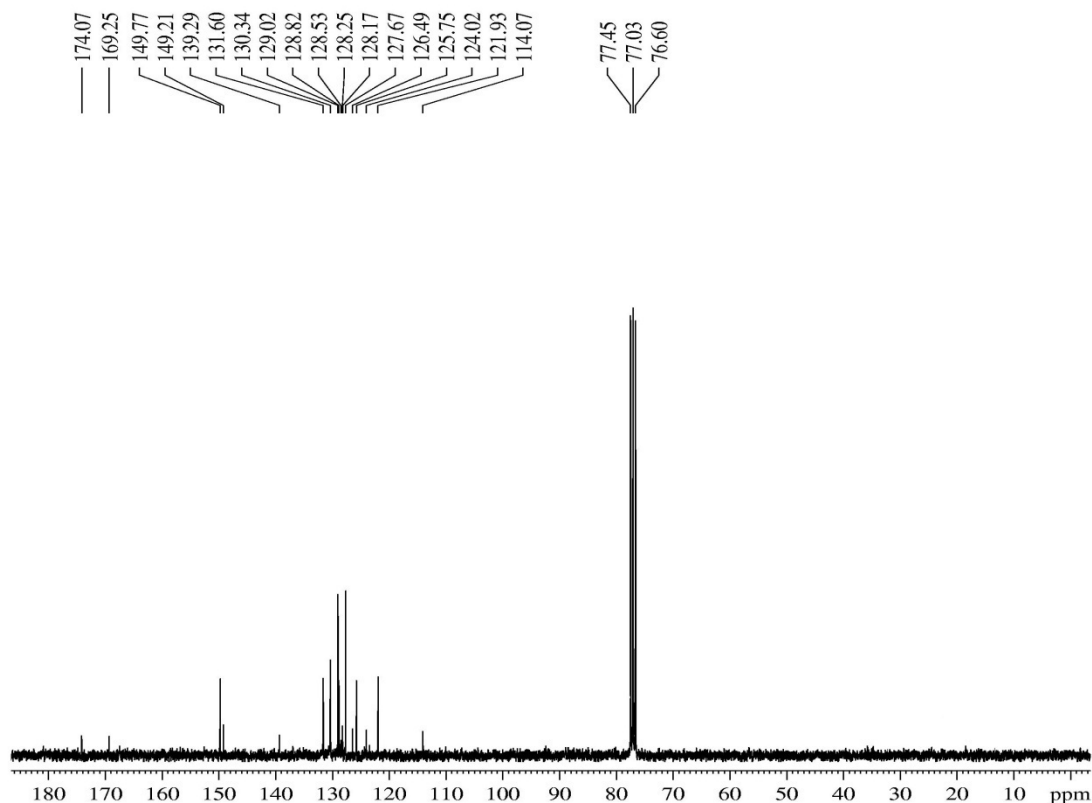

Figure 22:  $^1\text{H}$  and  $^{13}\text{C}$  Spectra of compound 3r

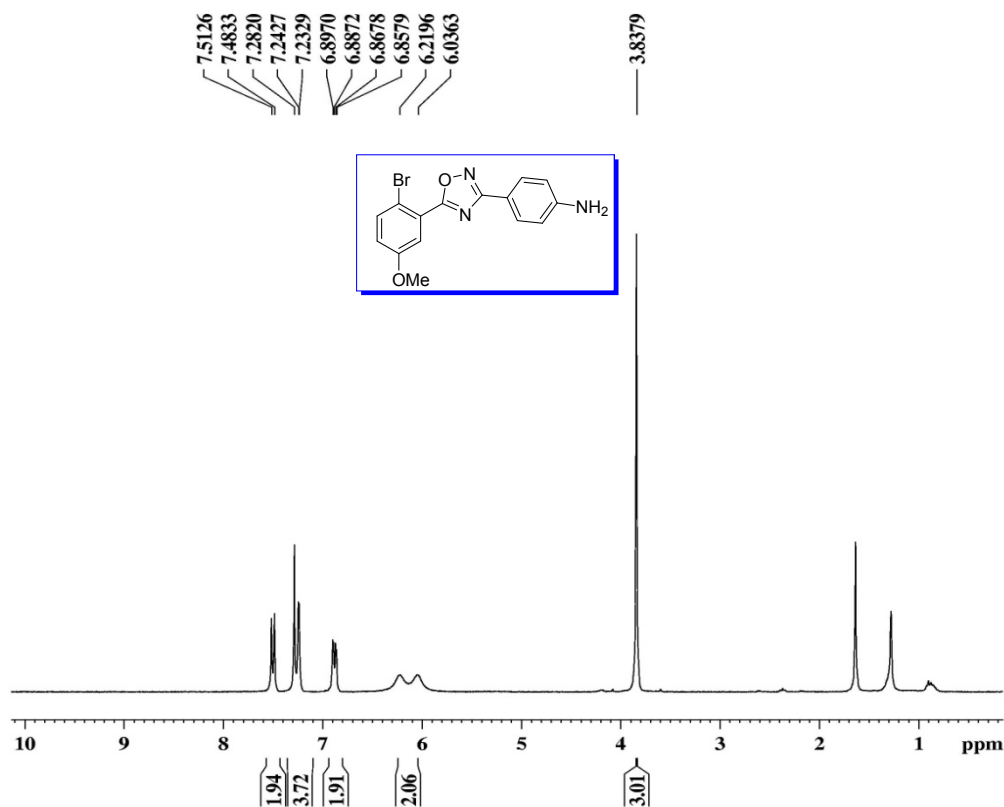

### PUNEET 74

Current Data Parameters  
NAME puneet-74(4-4-12)  
EXPNO 40  
PROCNO 1

F2 - Acquisition Parameters  
Date 20120404  
Time 0.32  
INSTRUM spect  
PROBHD 5 mm QNP 1H/13  
PULPROG zg30  
TD 65536  
SOLVENT CDCl<sub>3</sub>  
NS 16  
DS 2  
SWH 6188.119 Hz  
FIDRES 0.094423 Hz  
AQ 5.2953587 sec  
RG 256  
DW 80.800 usec  
DE 6.00 usec  
TE 298.0 K  
D1 1.0000000 sec  
TD0 1

===== CHANNEL f1 =====  
NUC1 1H  
P1 11.60 usec  
PL1 -1.00 dB  
SFO1 300.1318534 MHz

F2 - Processing parameters  
SI 32768  
SF 300.1300000 MHz  
WDW EM  
SSB 0

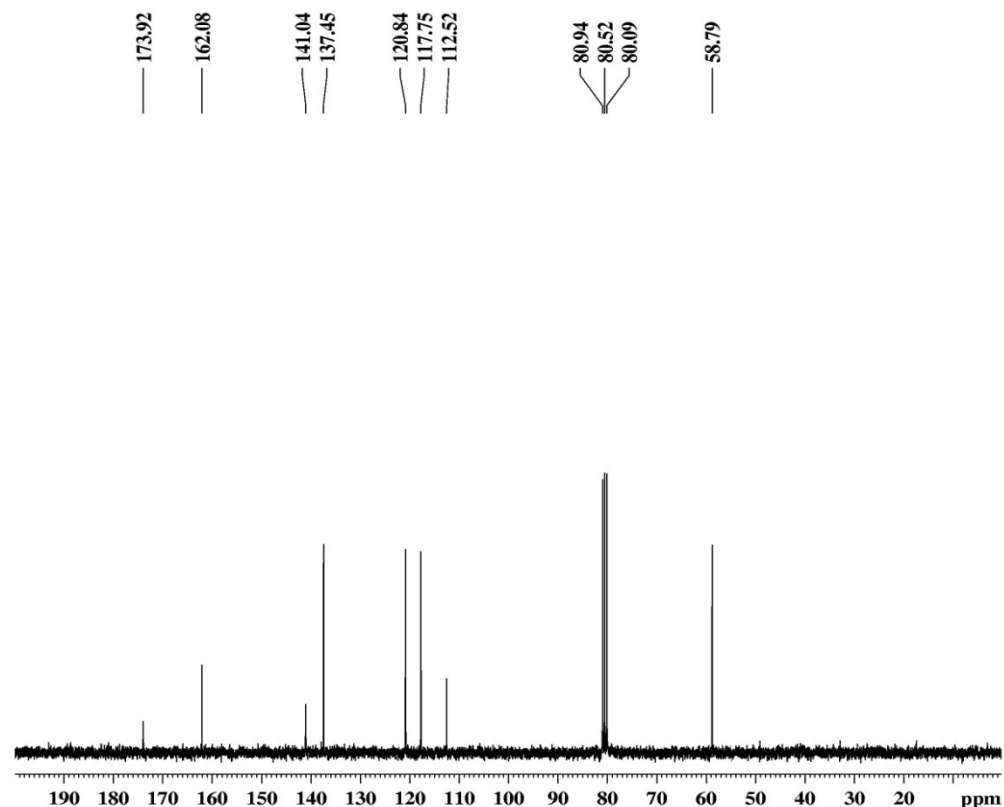

### PUNEET-74

Current Data Parameters  
NAME PUNEET-38U 13C(1  
EXPNO 80  
PROCNO 1

F2 - Acquisition Parameters  
Date 20120413  
Time 4.54  
INSTRUM spect  
PROBHD 5 mm QNP 1H/13  
PULPROG zgpg30  
TD 65536  
SOLVENT CDCl<sub>3</sub>  
NS 512  
DS 4  
SWH 18028.846 Hz  
FIDRES 0.275098 Hz  
AQ 1.8175818 sec  
RG 11.3  
DW 27.733 usec  
DE 6.00 usec  
TE 298.8 K  
D1 2.0000000 sec  
d11 0.03000000 sec  
DELTA 1.89999998 sec  
TD0 1

===== CHANNEL f1 =====  
NUC1 13C  
P1 8.70 usec  
PL1 -3.00 dB  
SFO1 75.4752953 MHz

===== CHANNEL f2 =====  
CPDPRG2 waltz16  
NUC2 1H  
PCPD2 80.00 usec  
PL2 -1.00 dB  
PL12 17.00 dB  
PL13 21.00 dB  
SFO2 300.1312005 MHz

Figure 23: <sup>1</sup>H and <sup>13</sup>C Spectra of compound 3s

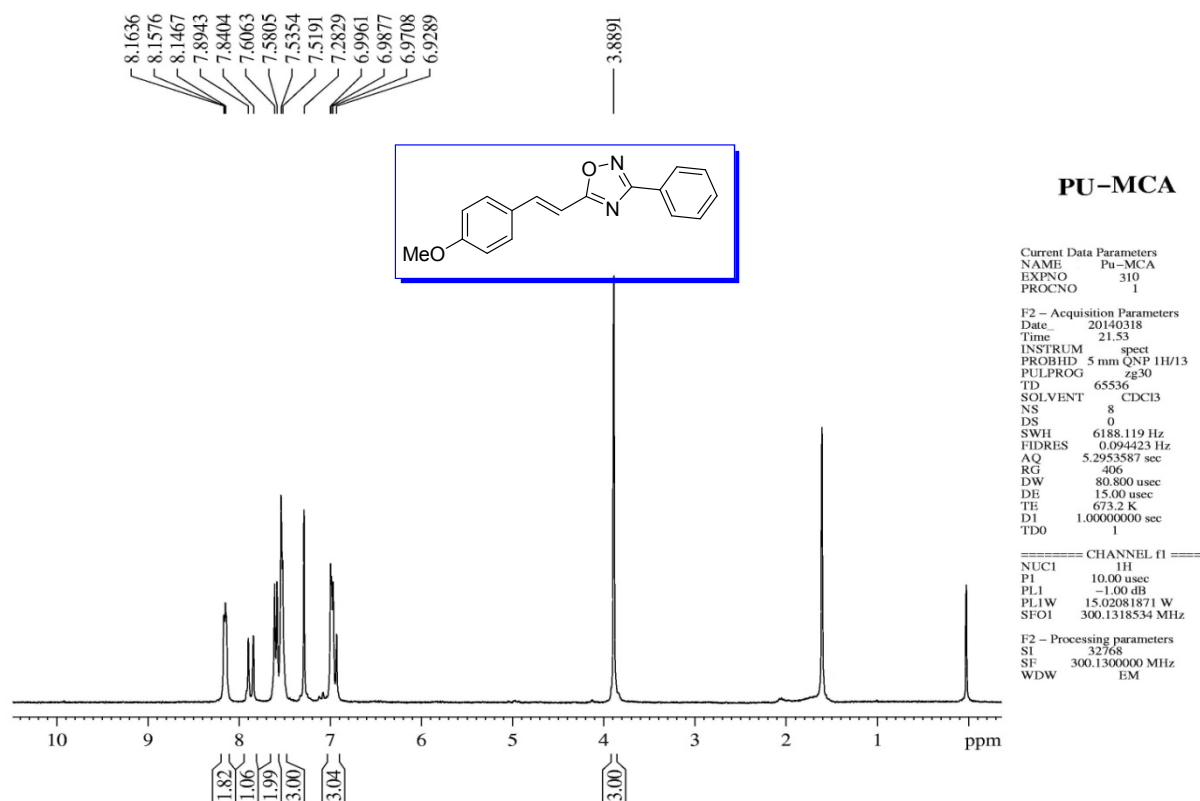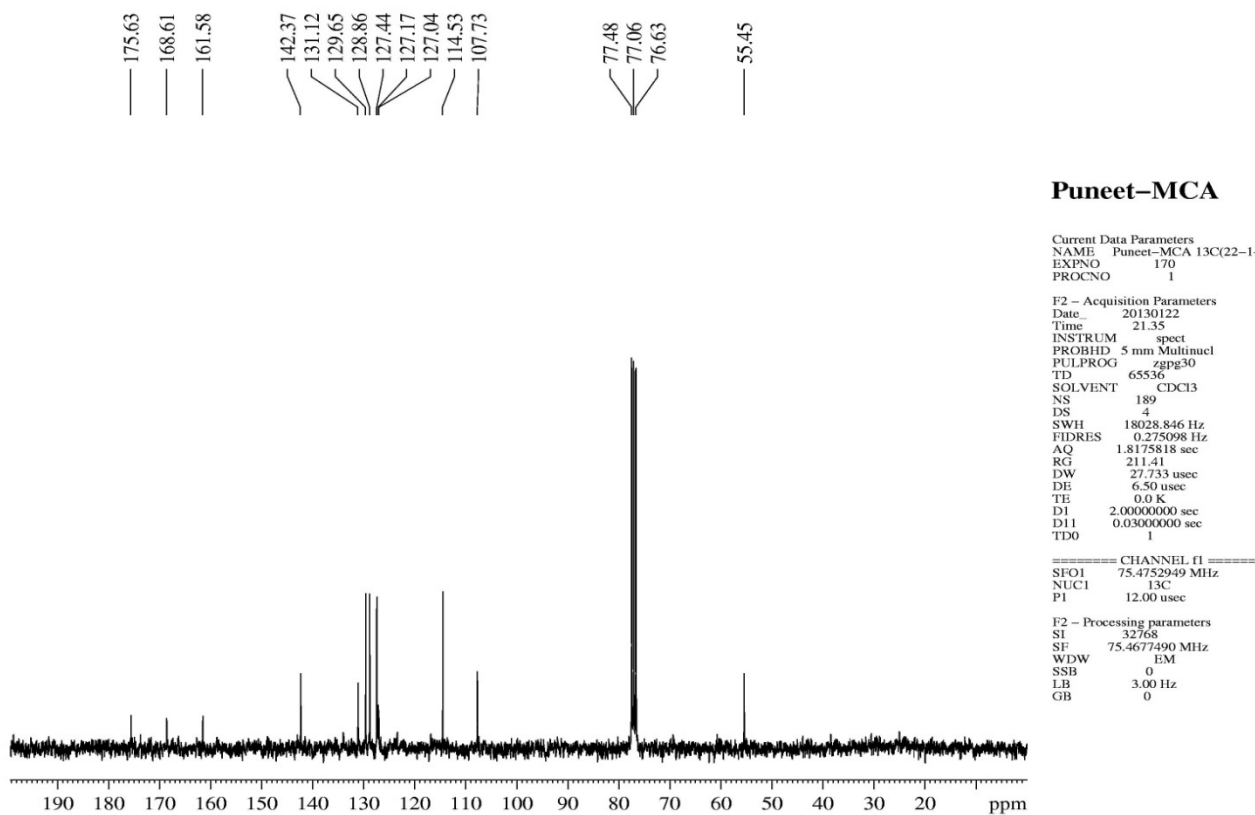

**Figure 24: <sup>1</sup>H and <sup>13</sup>C Spectra of compound 3t**

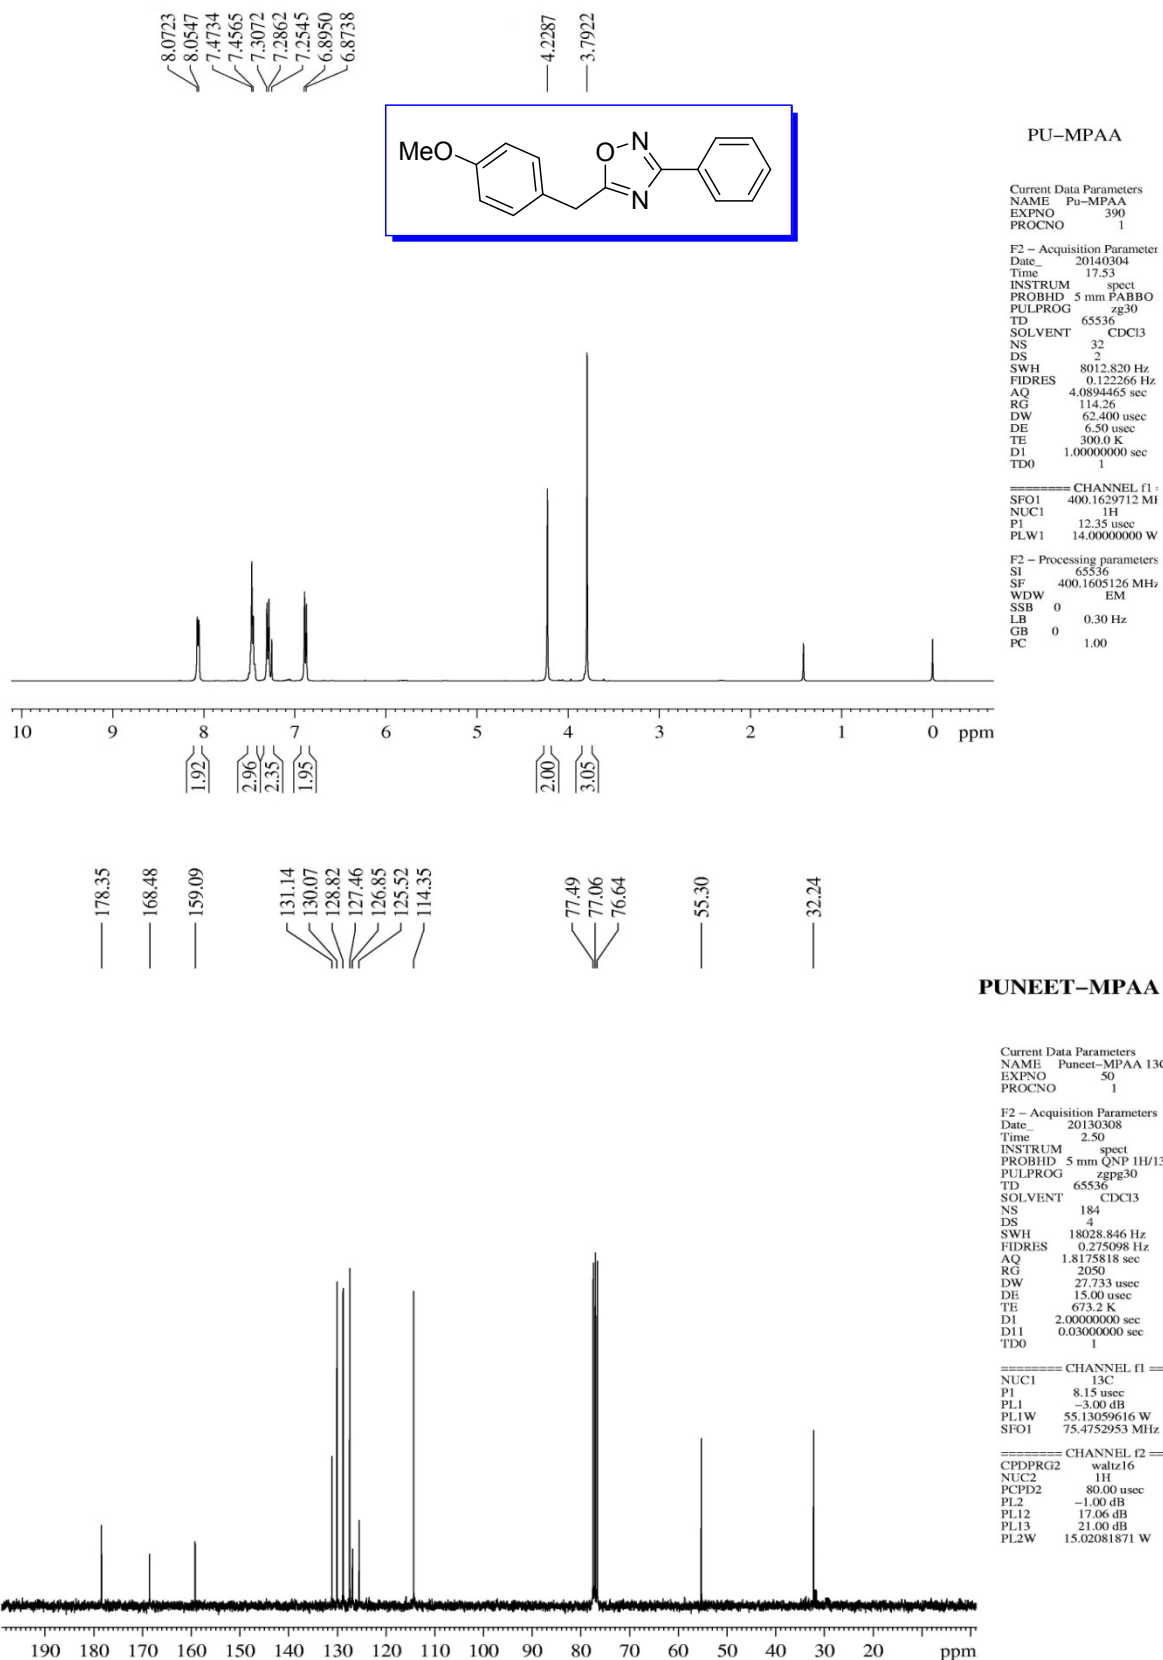

Figure 25:  $^1\text{H}$  and  $^{13}\text{C}$  Spectra of compound 3u

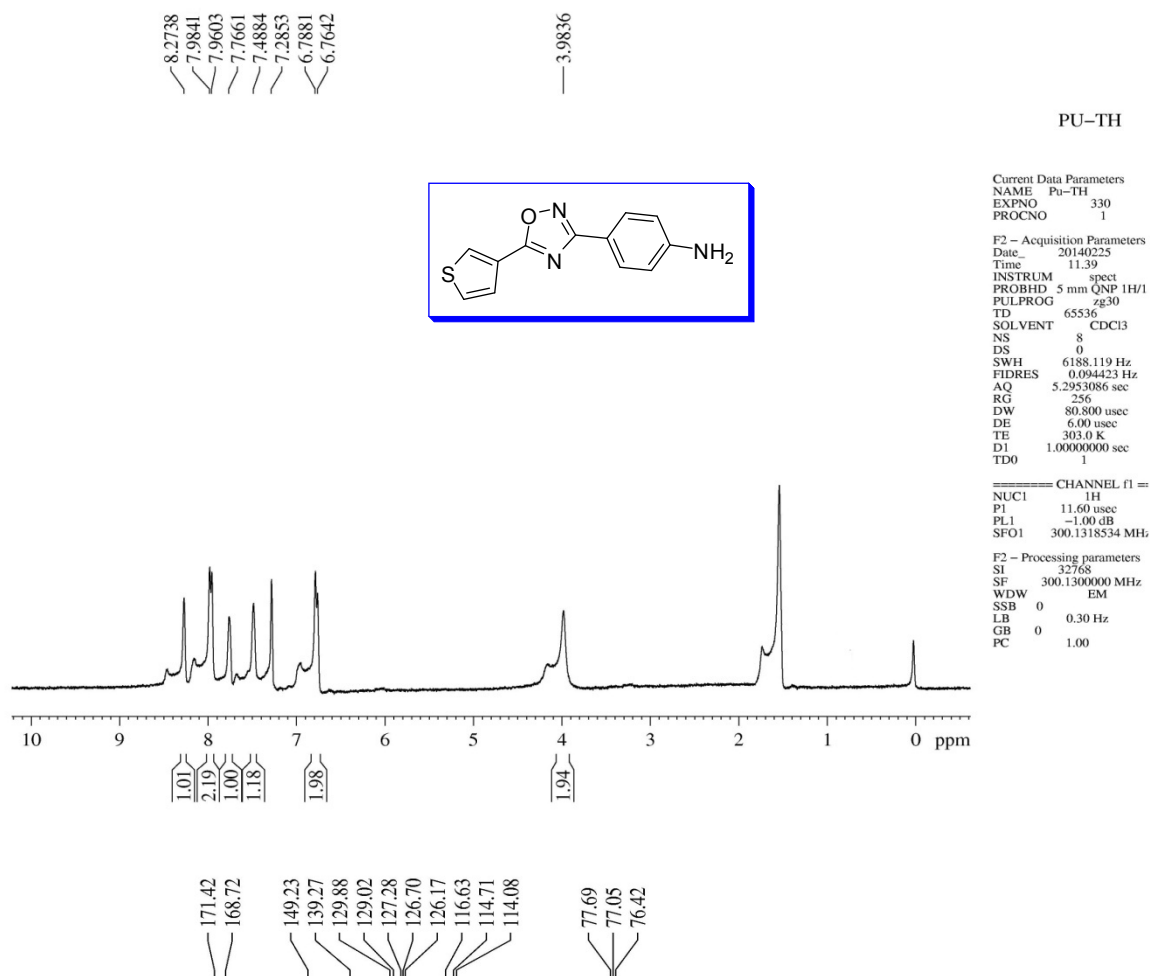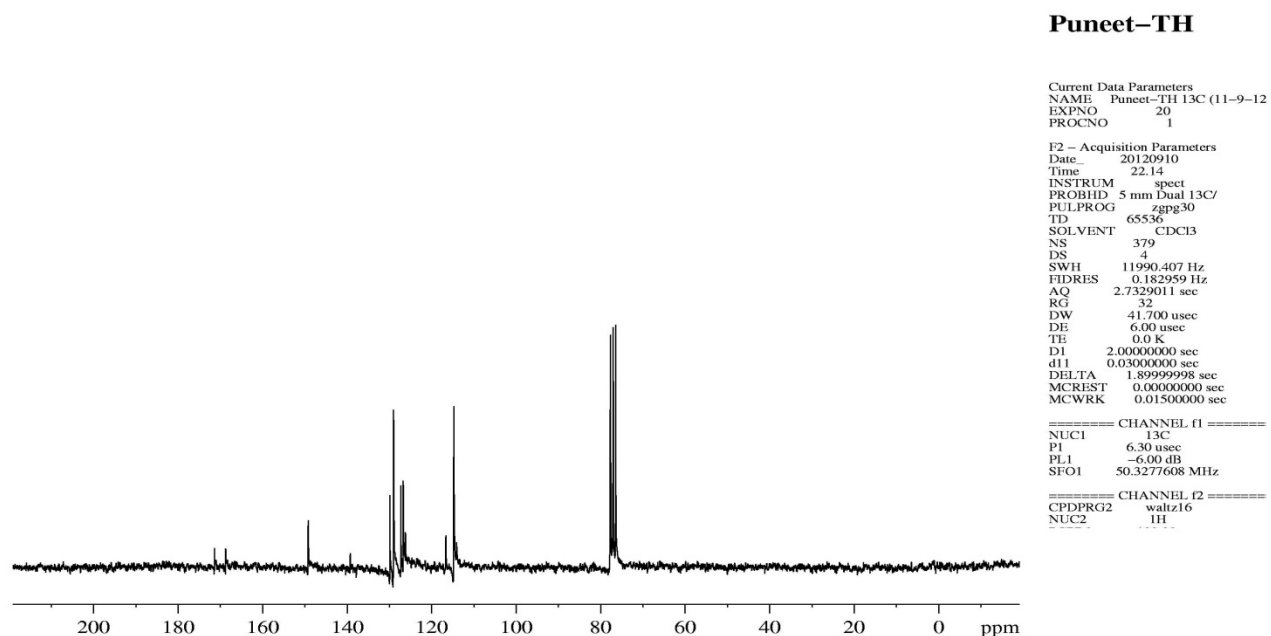

Figure 26: <sup>1</sup>H and <sup>13</sup>C Spectra of compound 3v

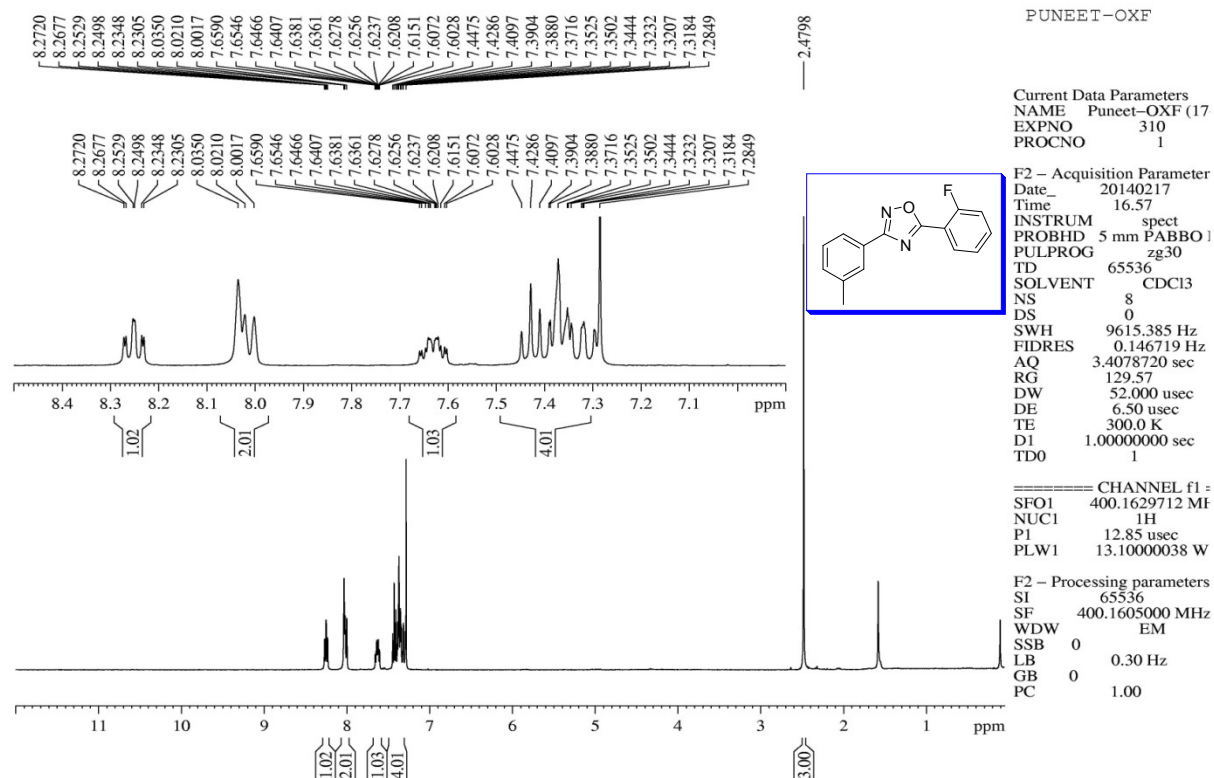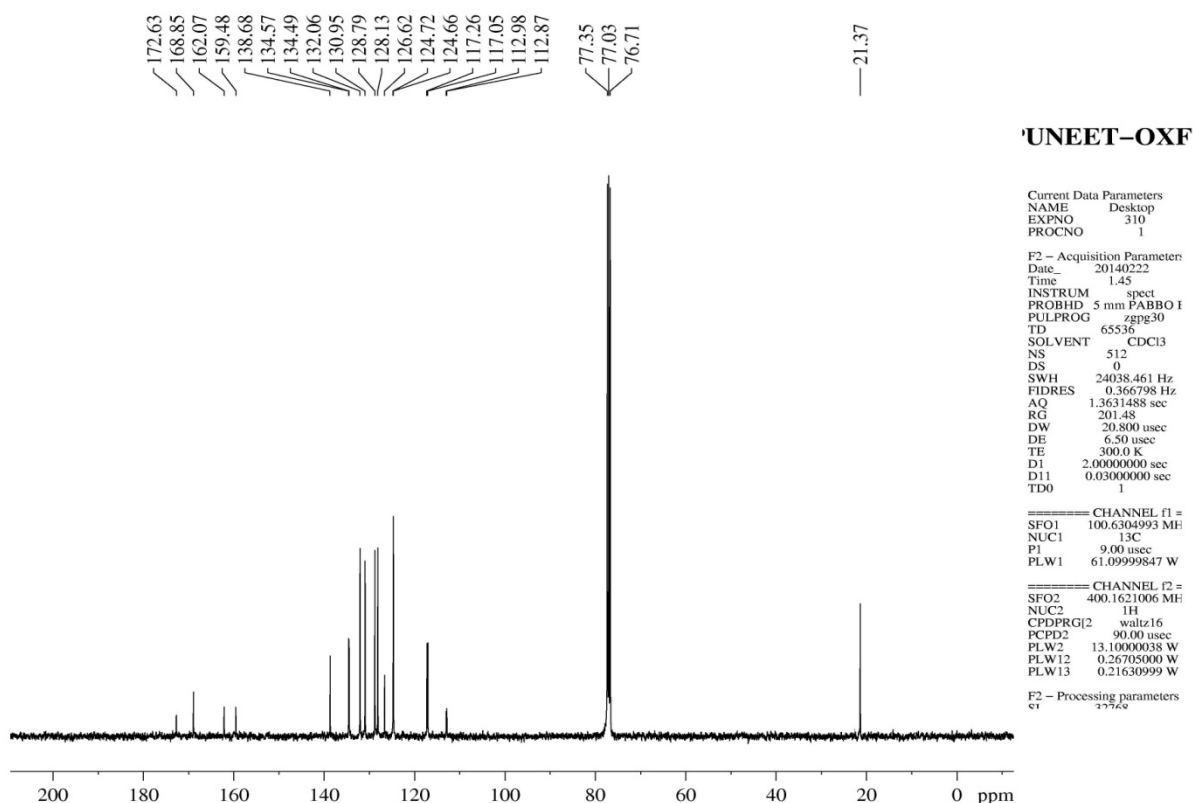

Figure 27:  $^1\text{H}$  and  $^{13}\text{C}$  Spectra of compound 3w



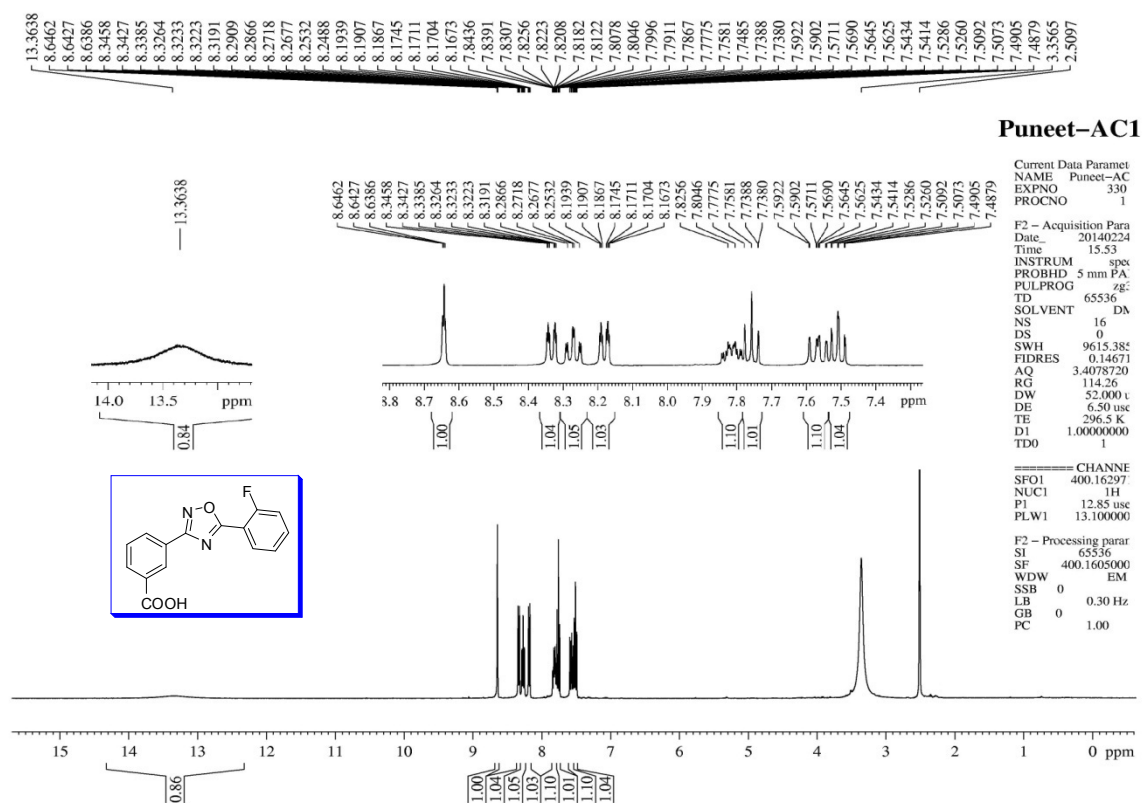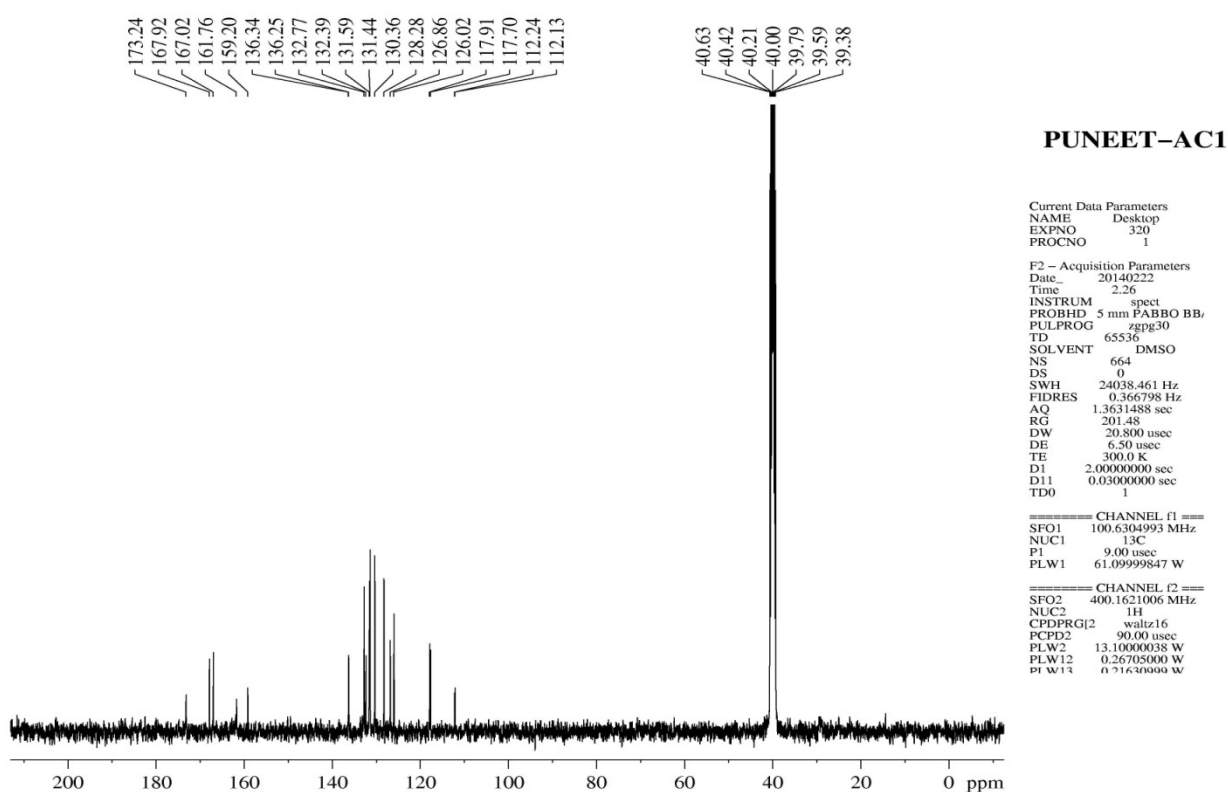

Figure 28:  $^1\text{H}$  and  $^{13}\text{C}$  Spectra of compound 3x

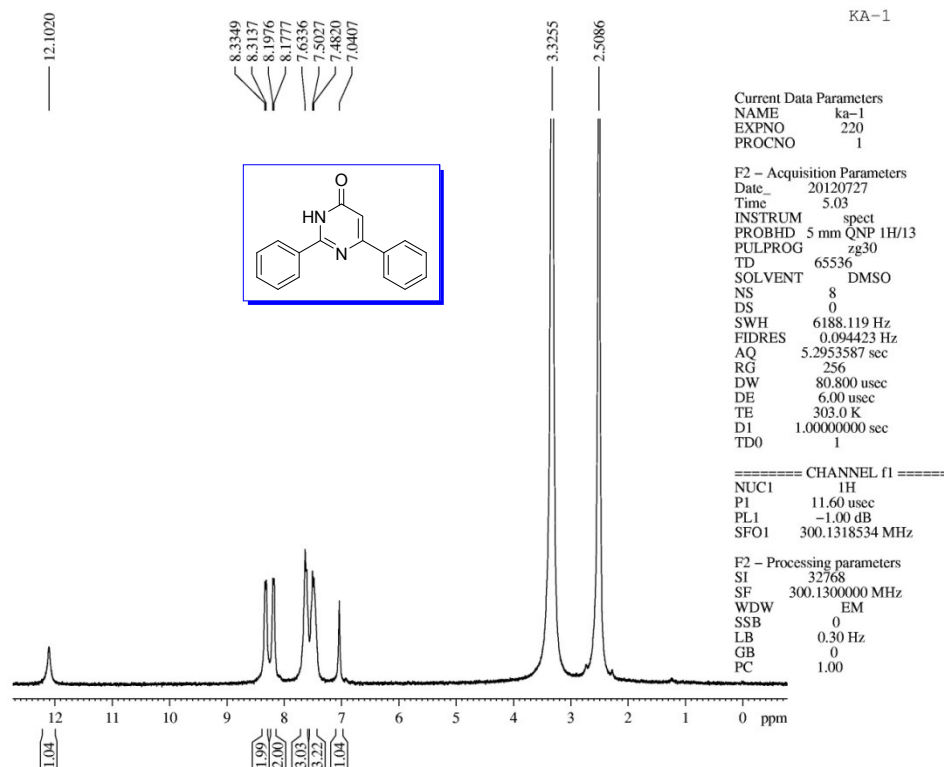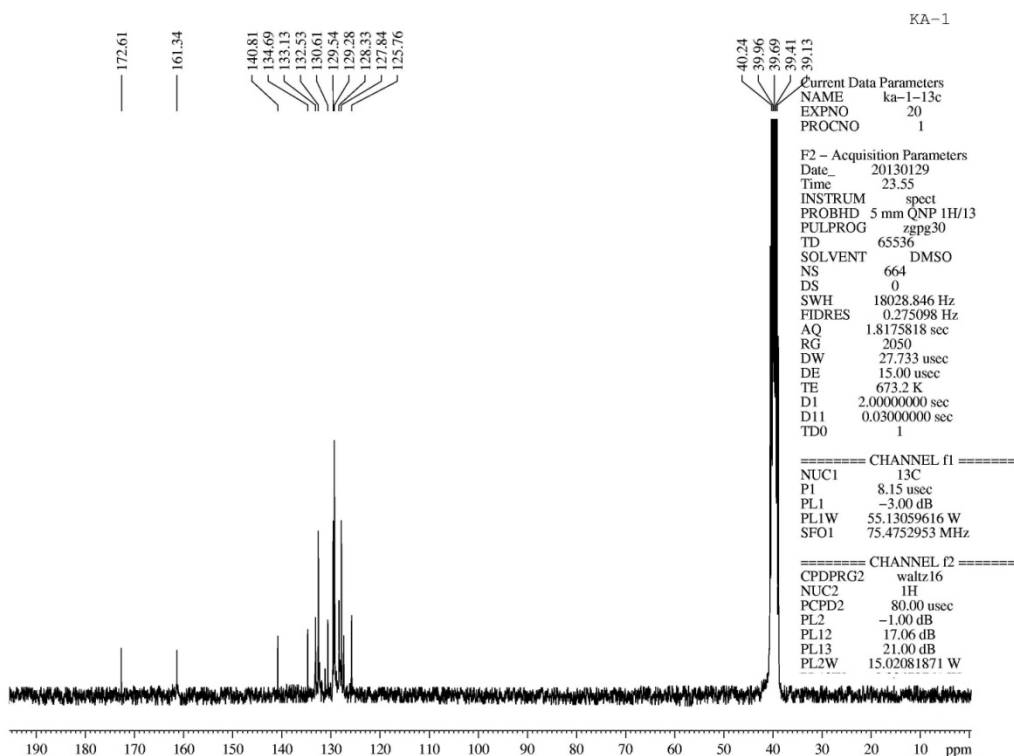

Figure 29:  $^1\text{H}$  and  $^{13}\text{C}$  Spectra of compound 5a

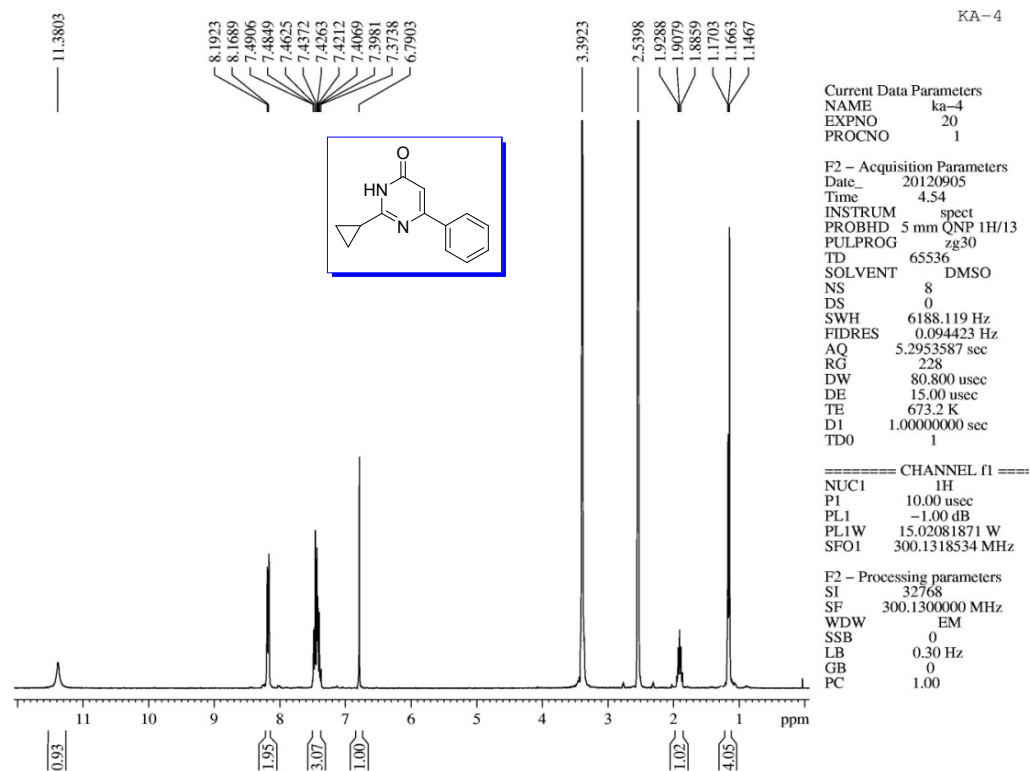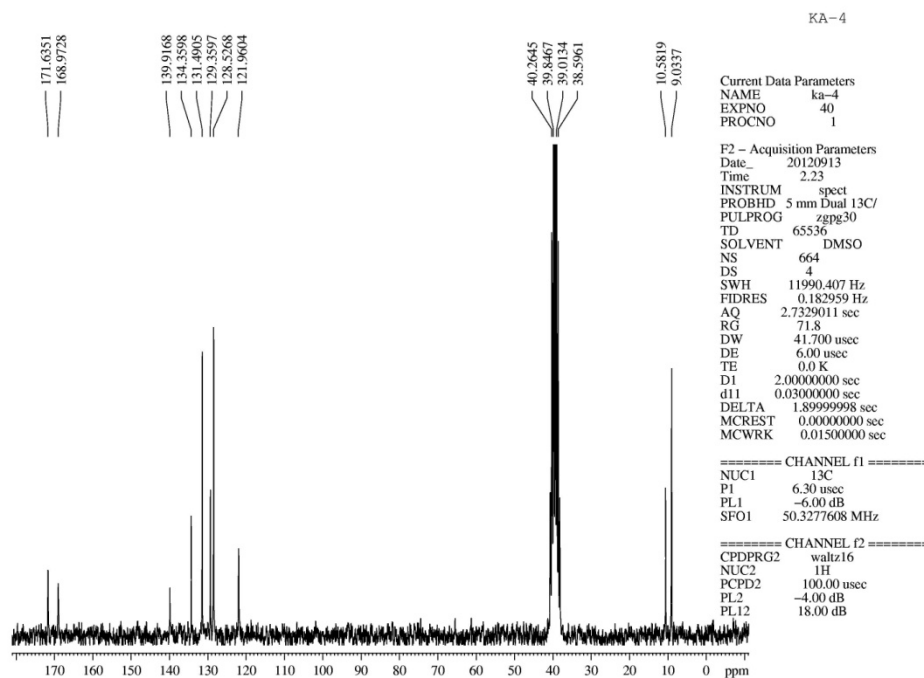

Figure 30:  $^1\text{H}$  and  $^{13}\text{C}$  Spectra of compound 5b

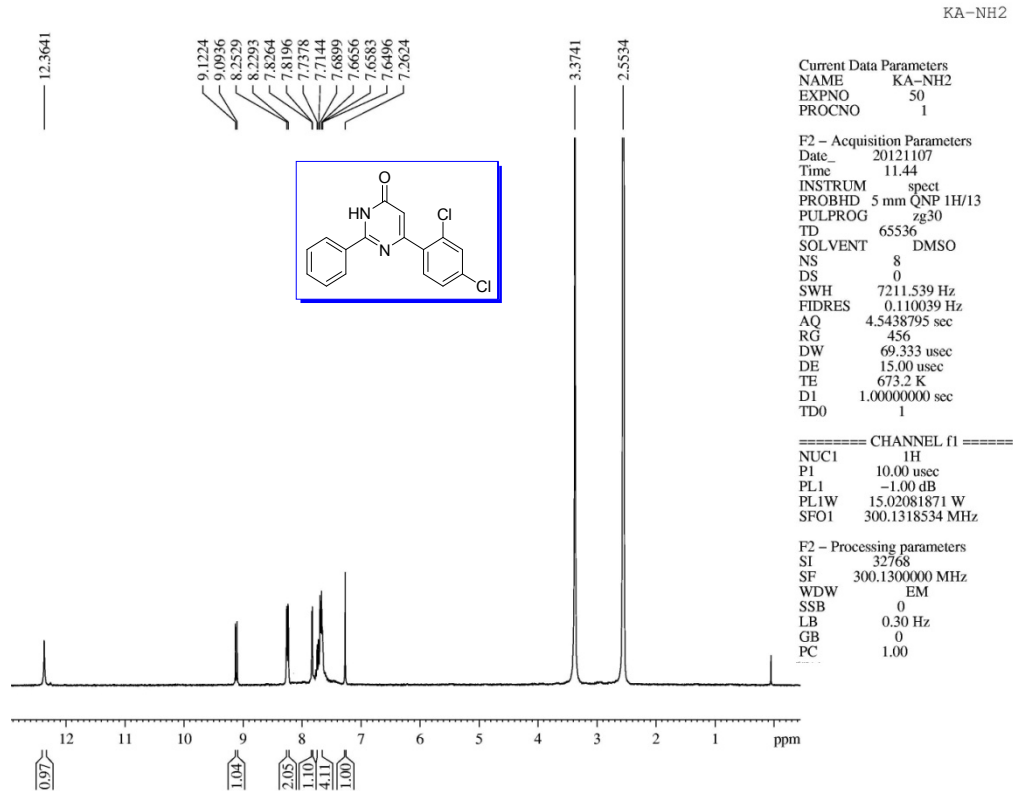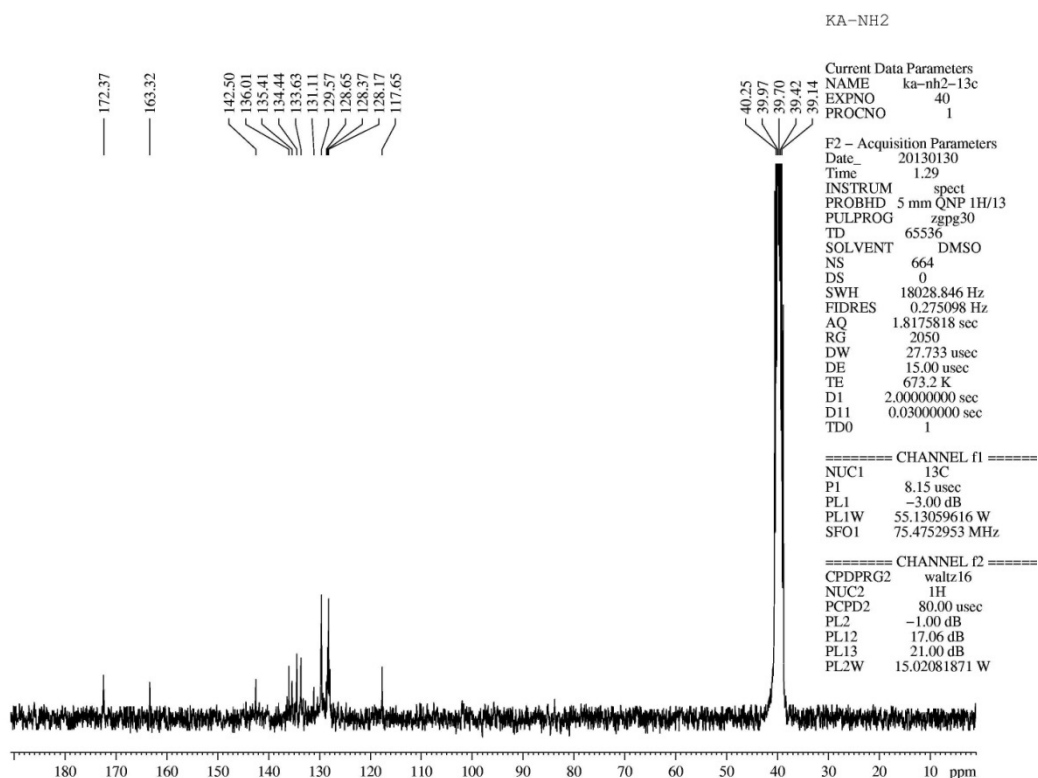

Figure 31:  $^1\text{H}$  and  $^{13}\text{C}$  Spectra of compound 5c

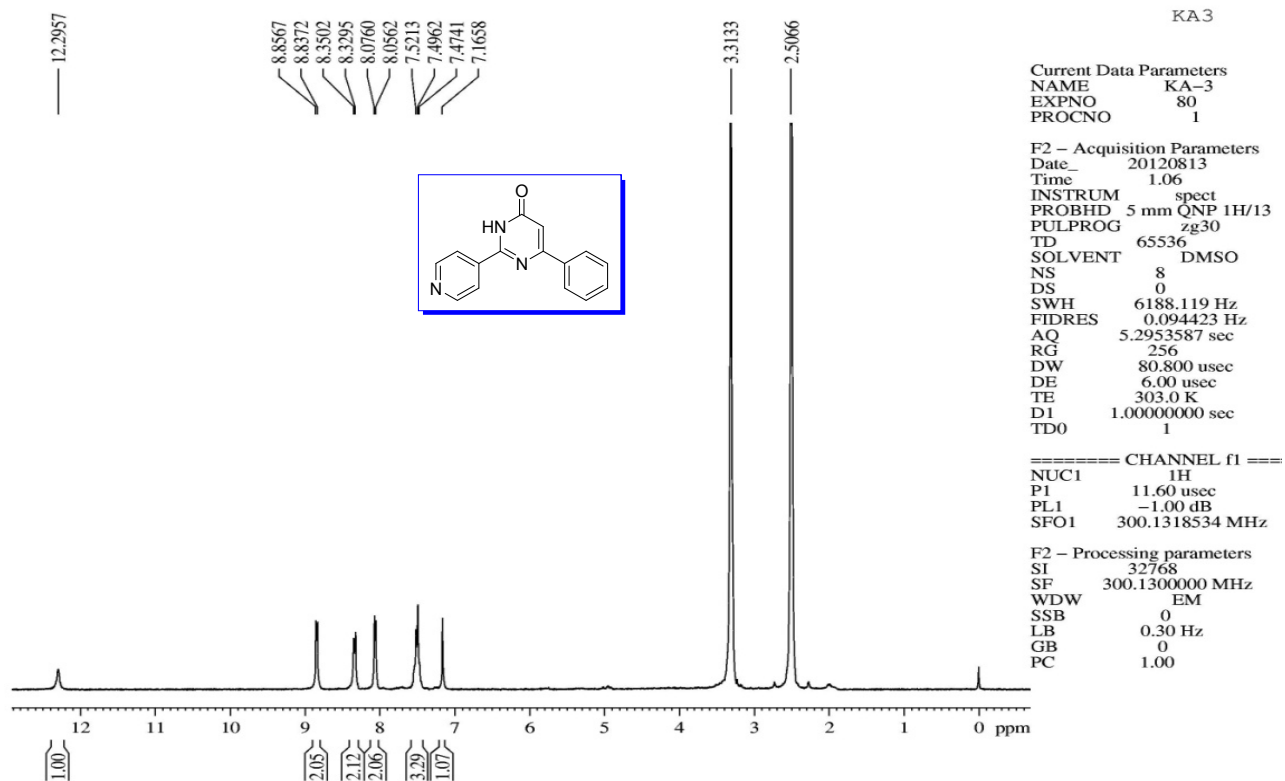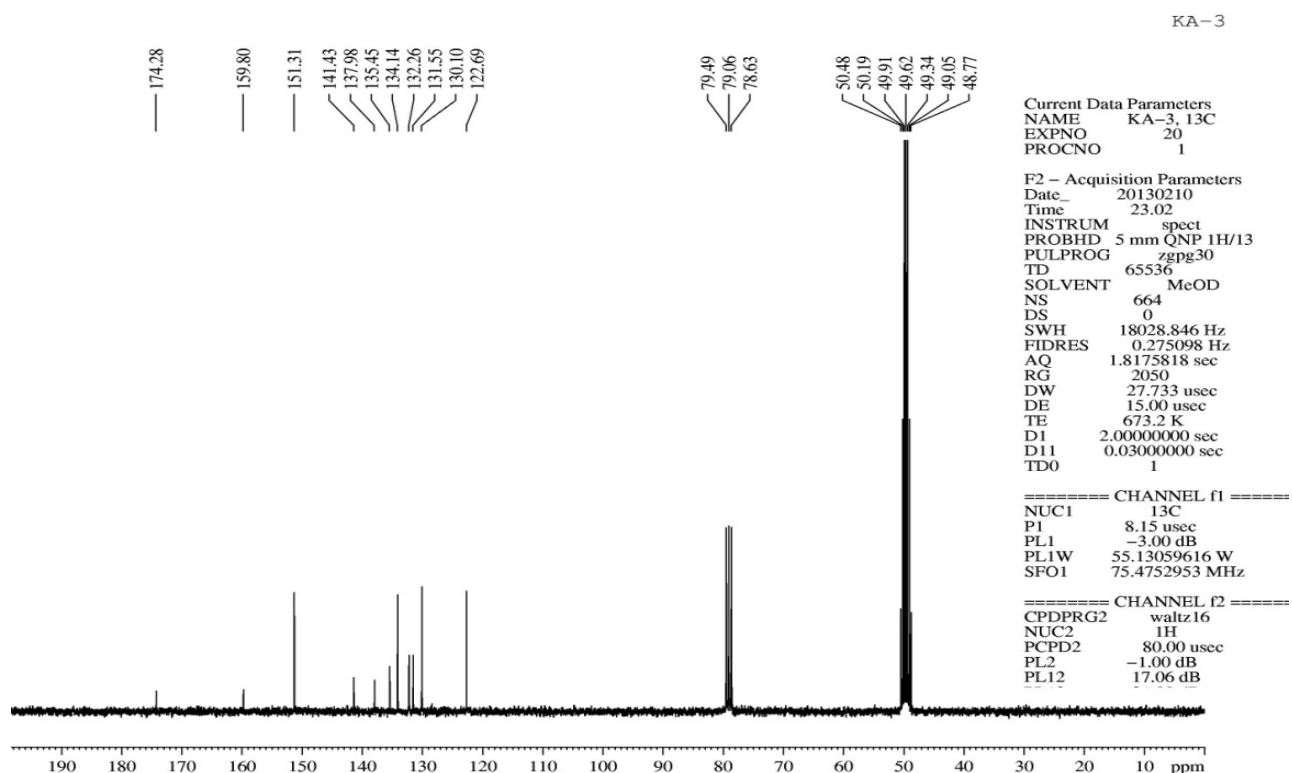

Figure 32:  $^1\text{H}$  and  $^{13}\text{C}$  Spectra of compound 5d

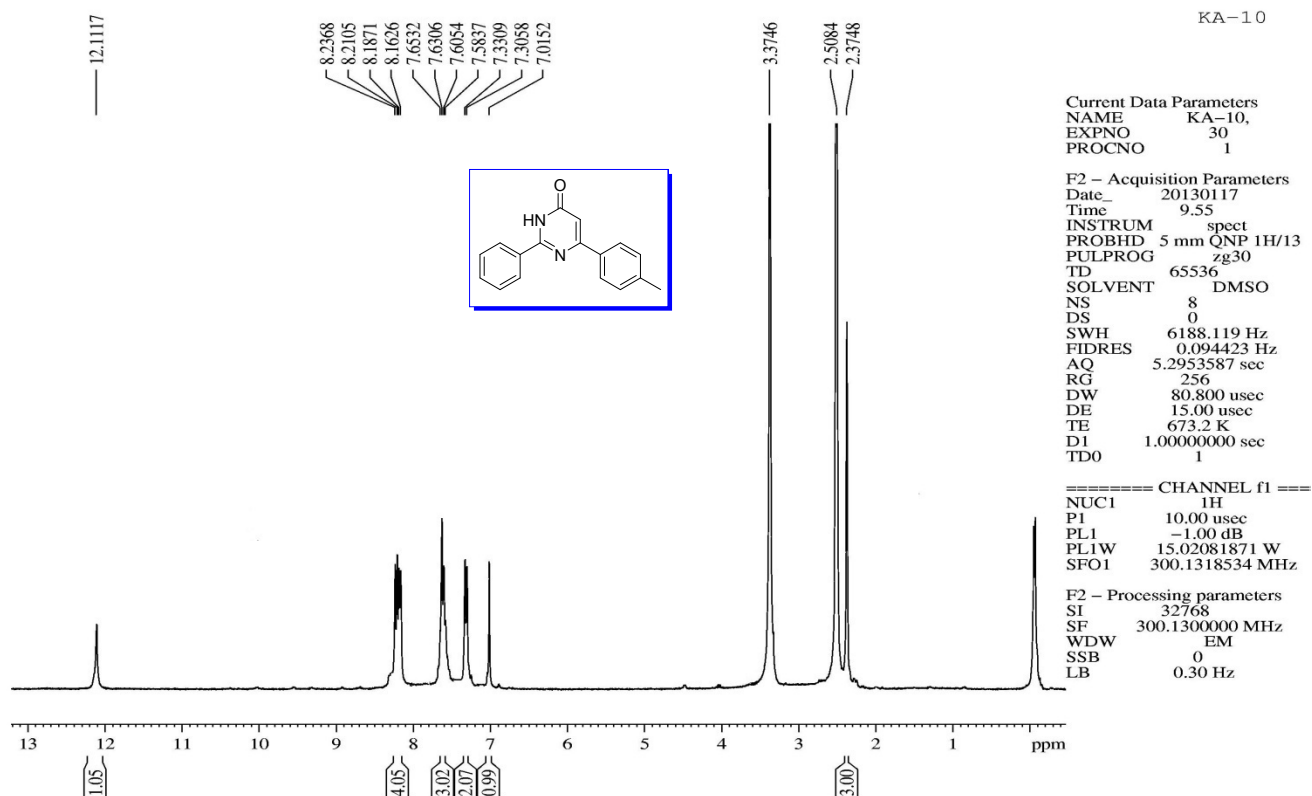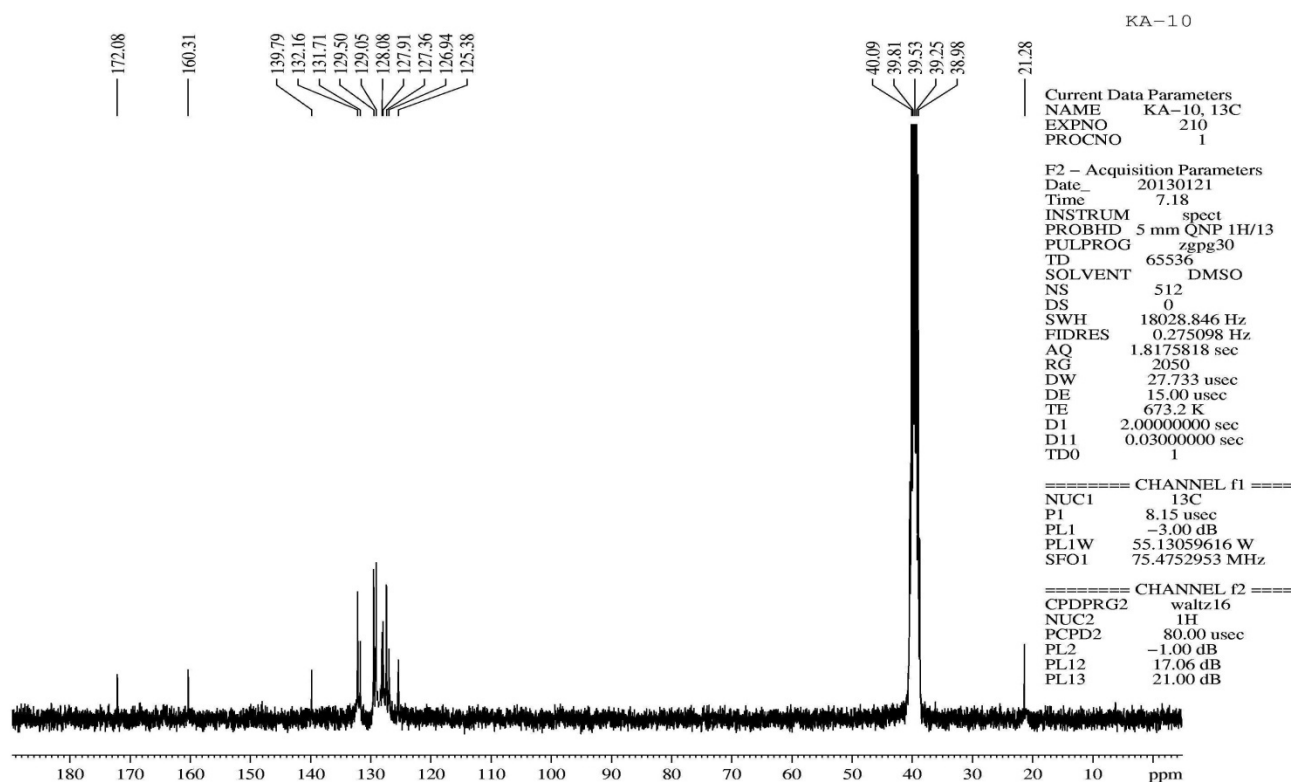

Figure 33:  $^1\text{H}$  and  $^{13}\text{C}$  Spectra of compound 5e

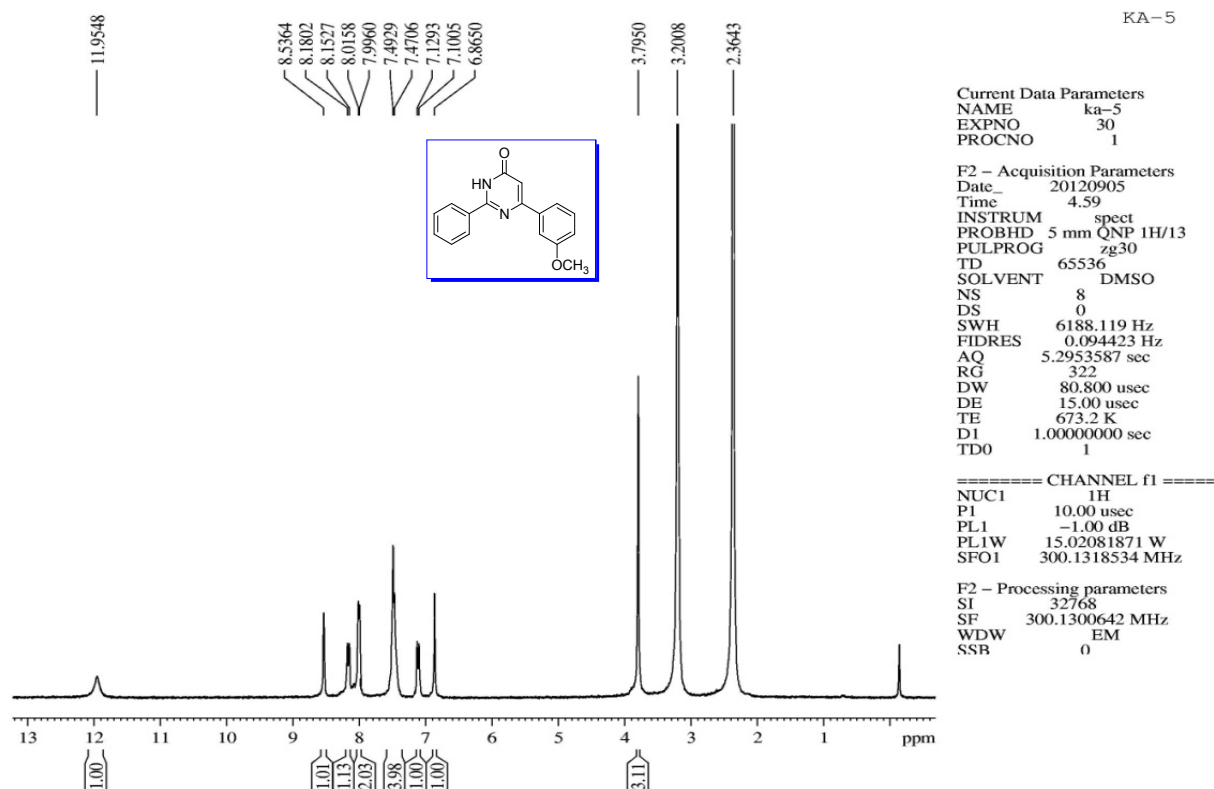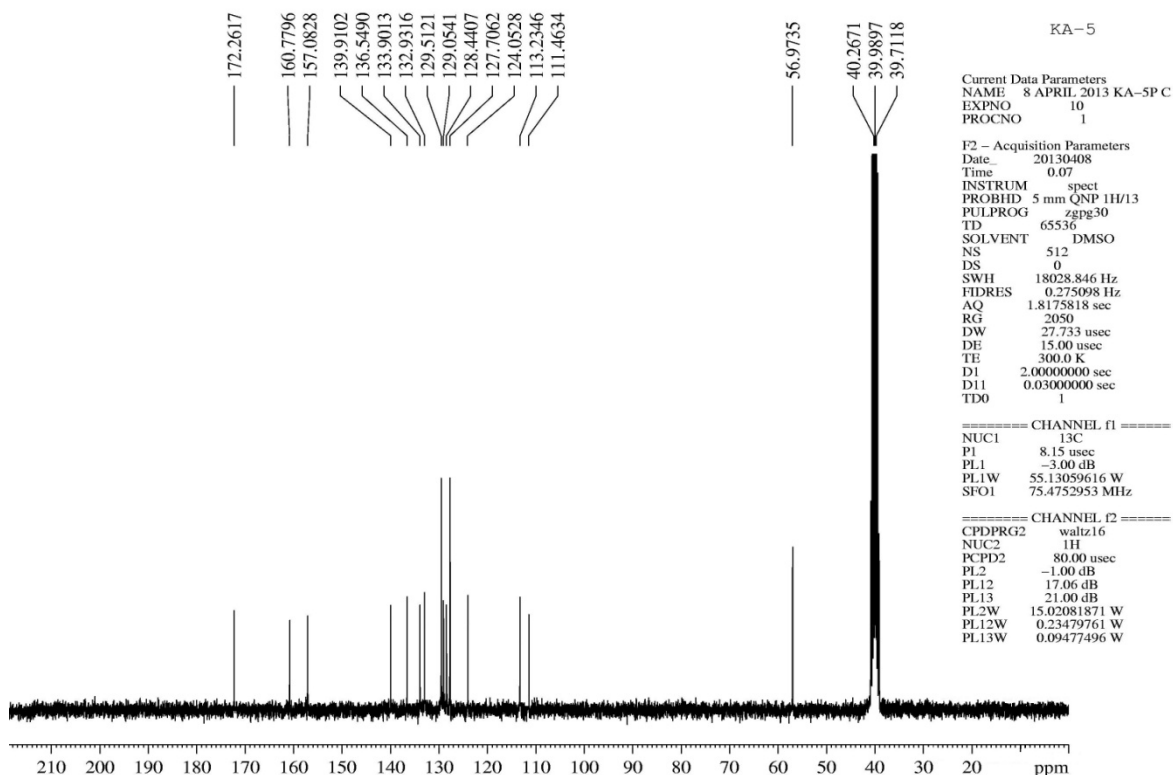

Figure 34: <sup>1</sup>H and <sup>13</sup>C Spectra of compound 5f



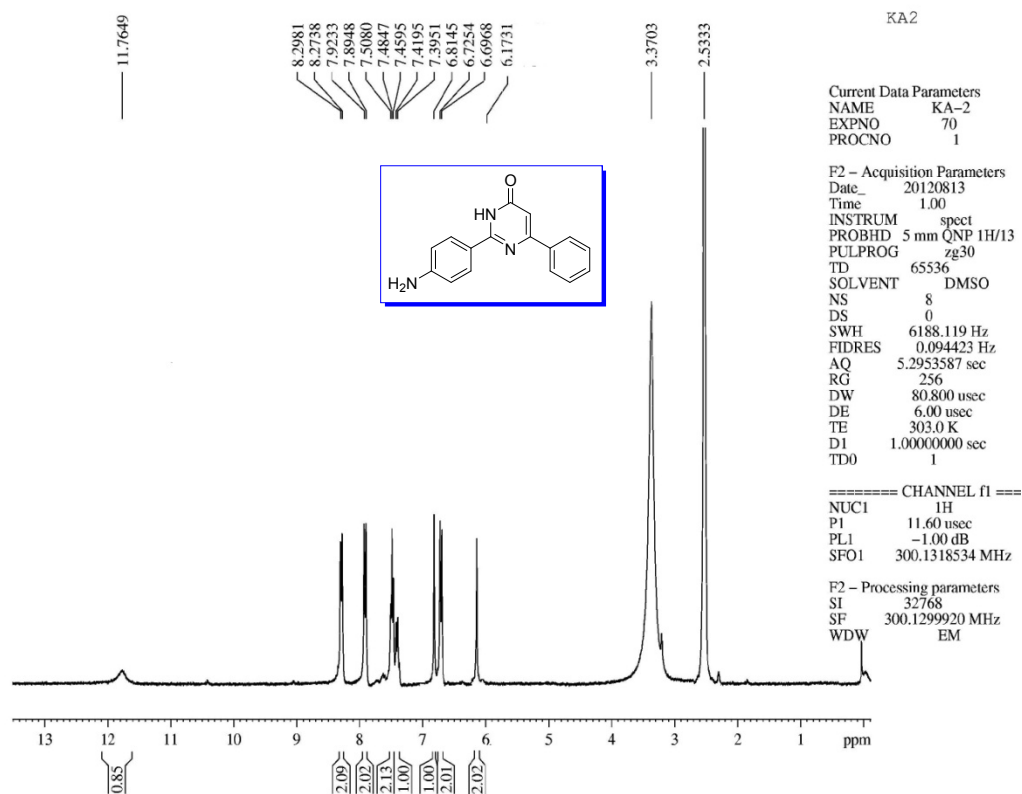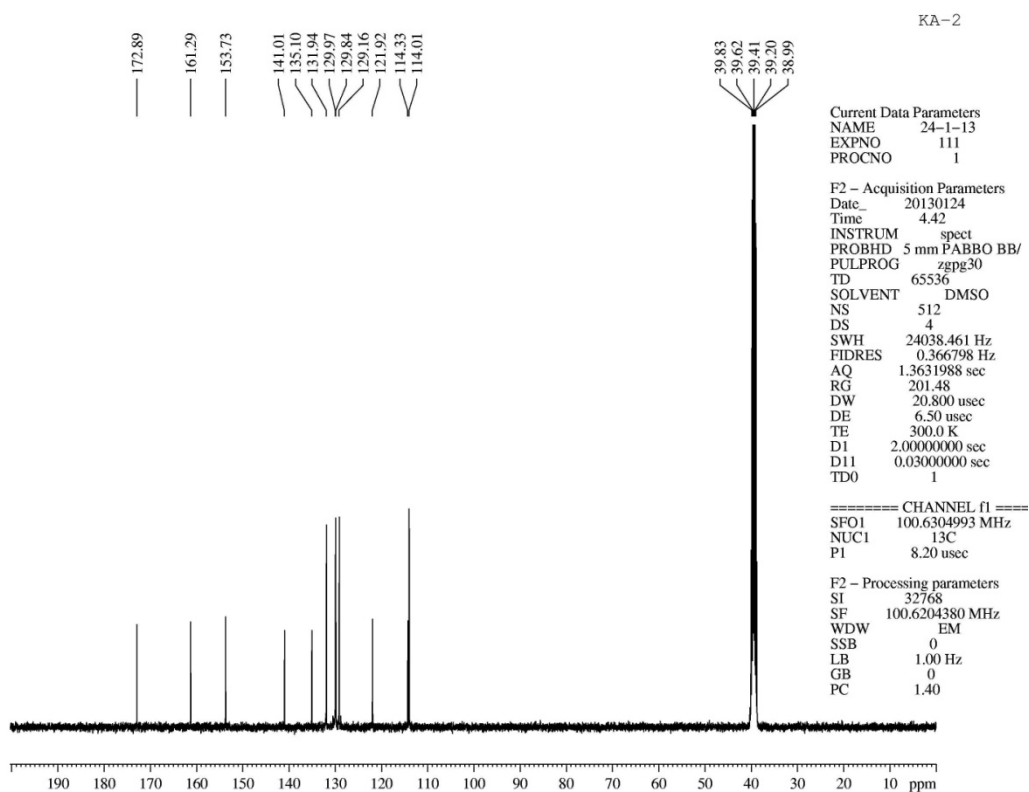

Figure 35:  $^1\text{H}$  and  $^{13}\text{C}$  Spectra of compound 5g



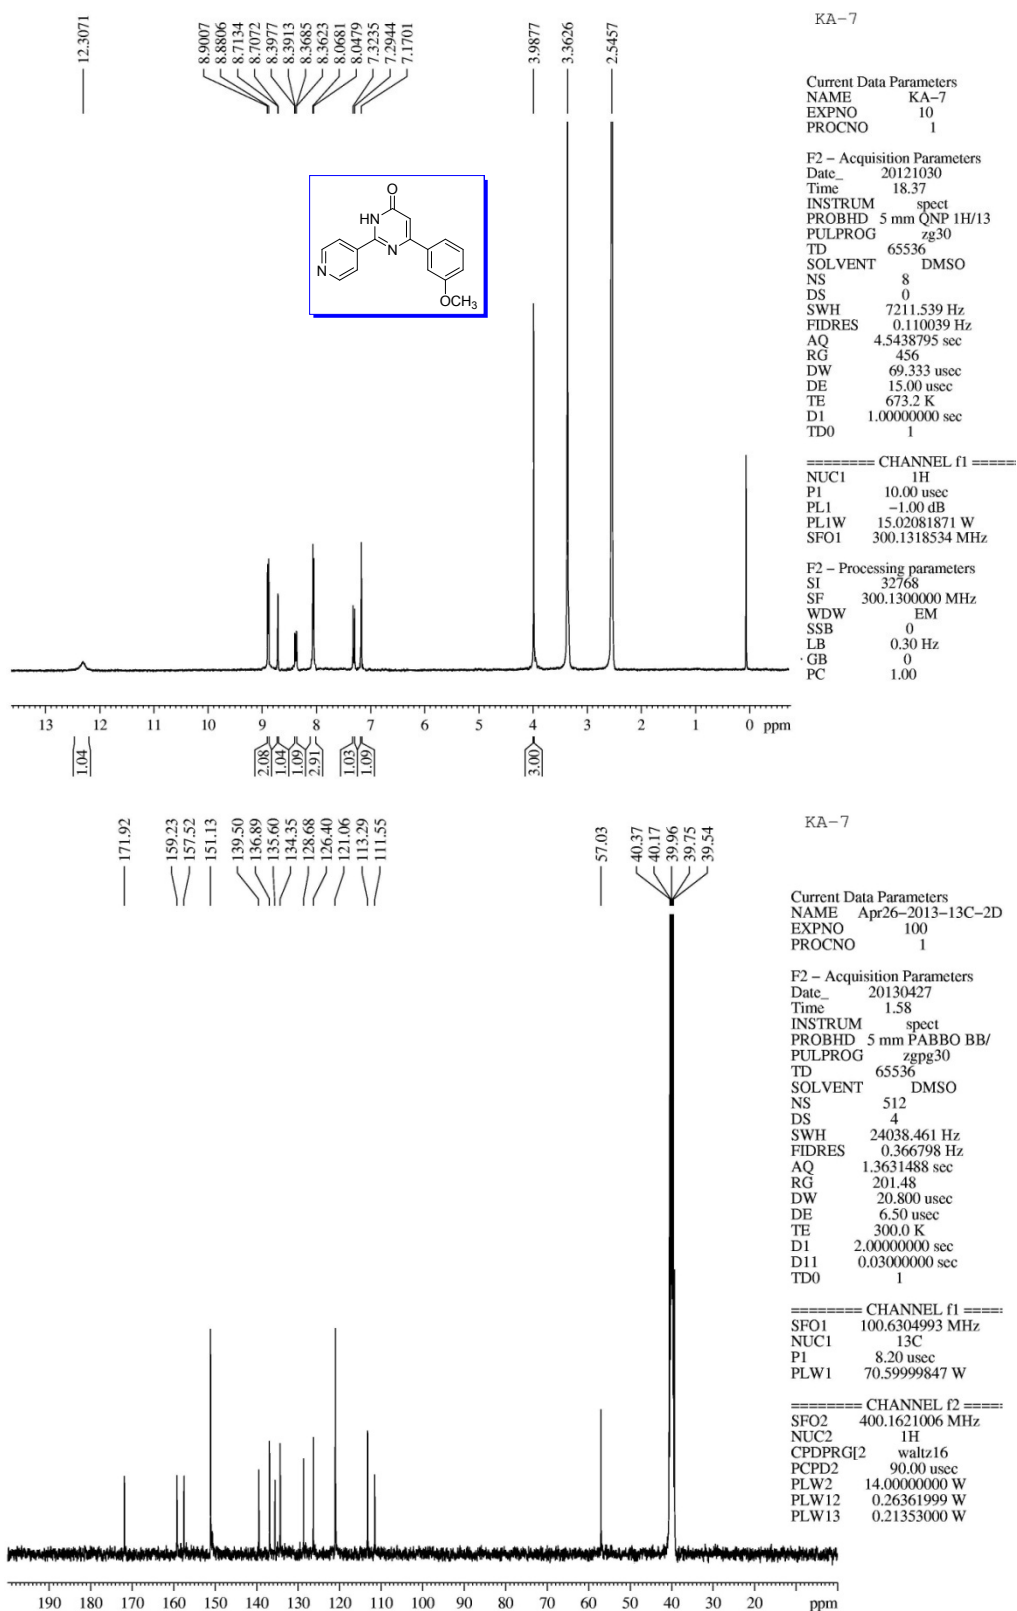

Figure 36: <sup>1</sup>H and <sup>13</sup>C Spectra of compound 5h

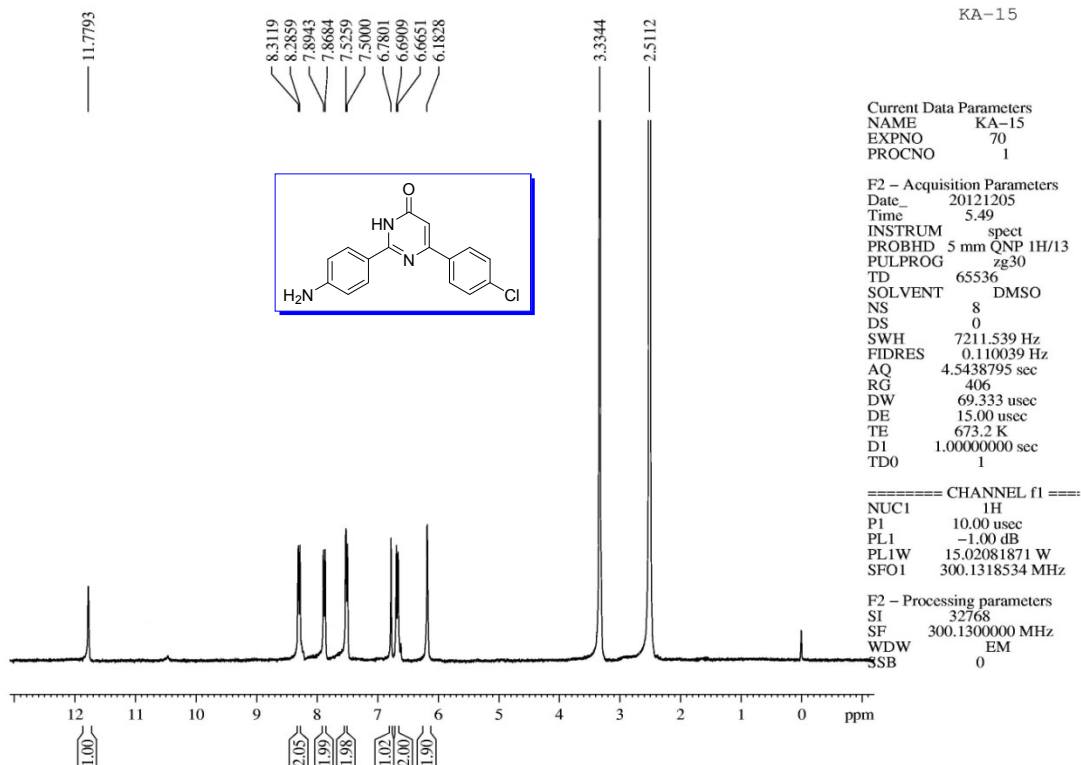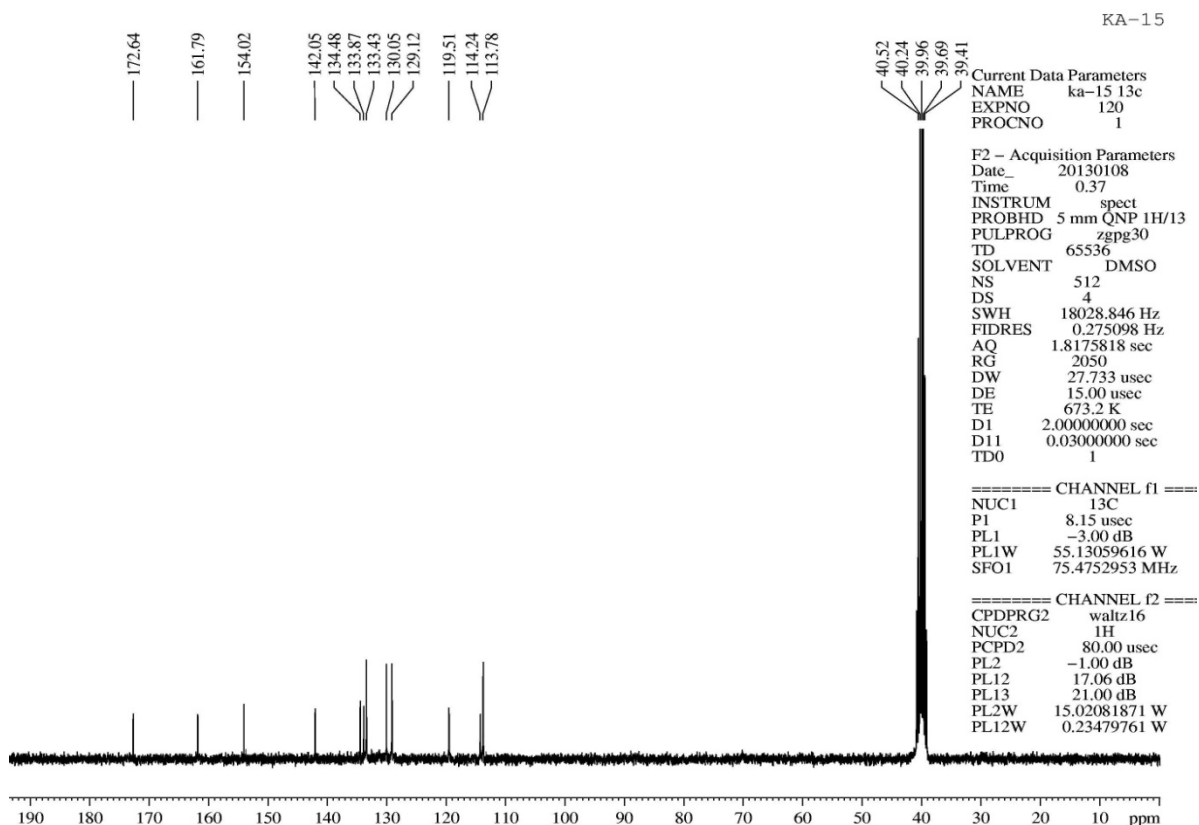

Figure 37:  $^1\text{H}$  and  $^{13}\text{C}$  Spectra of compound 5i

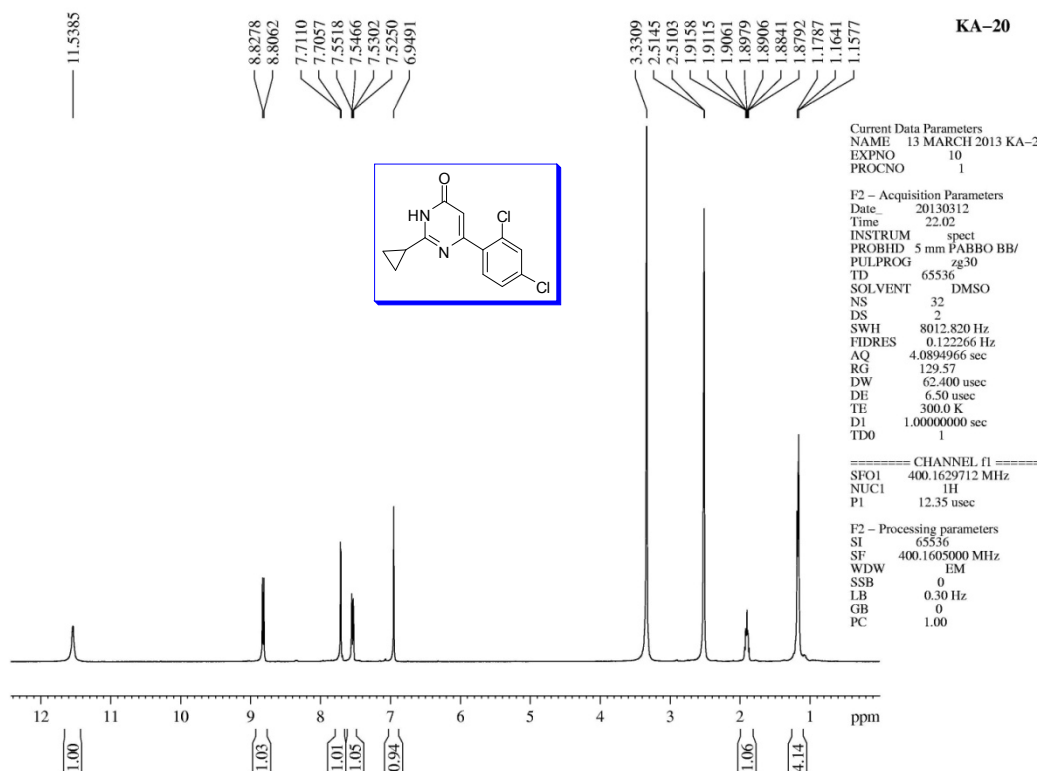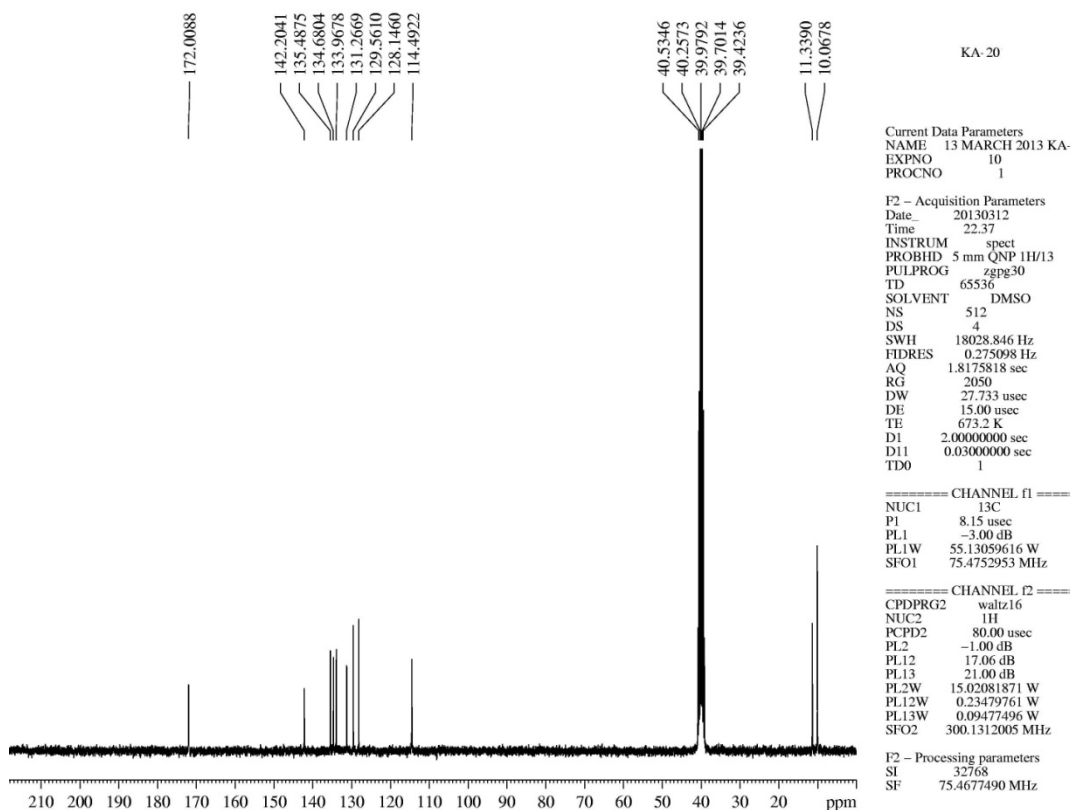

Figure 38:  $^1\text{H}$  and  $^{13}\text{C}$  Spectra of compound 5j

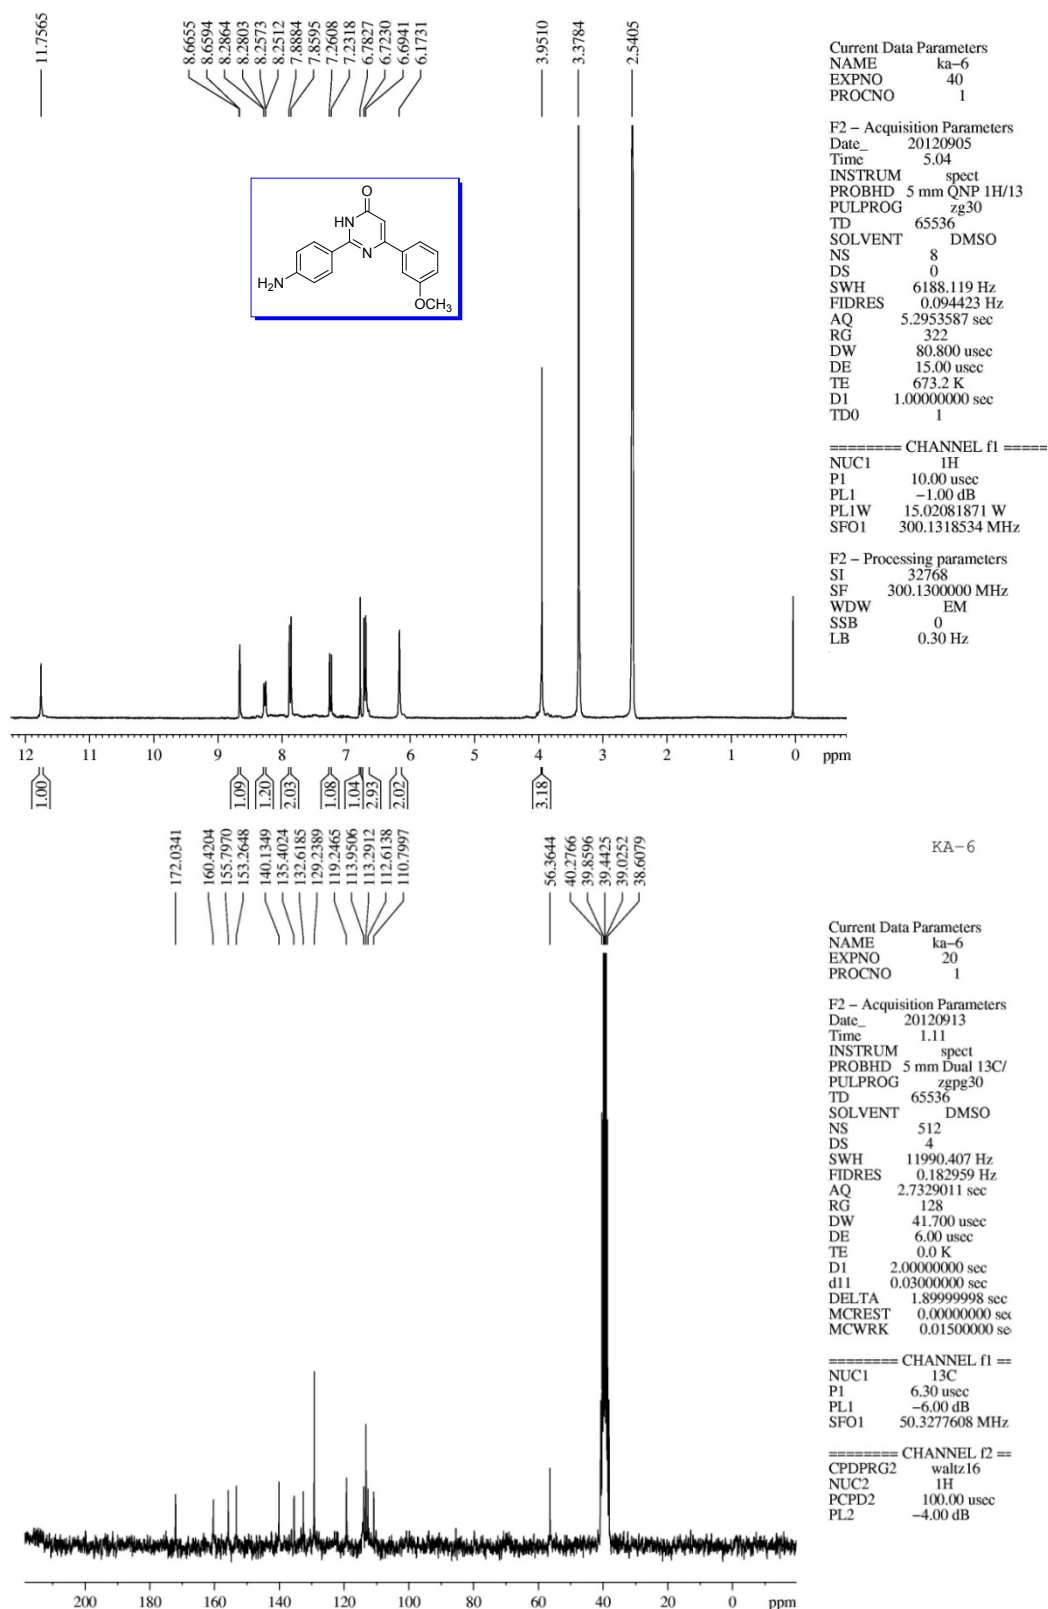

Figure 39: <sup>1</sup>H and <sup>13</sup>C Spectra of compound 5k

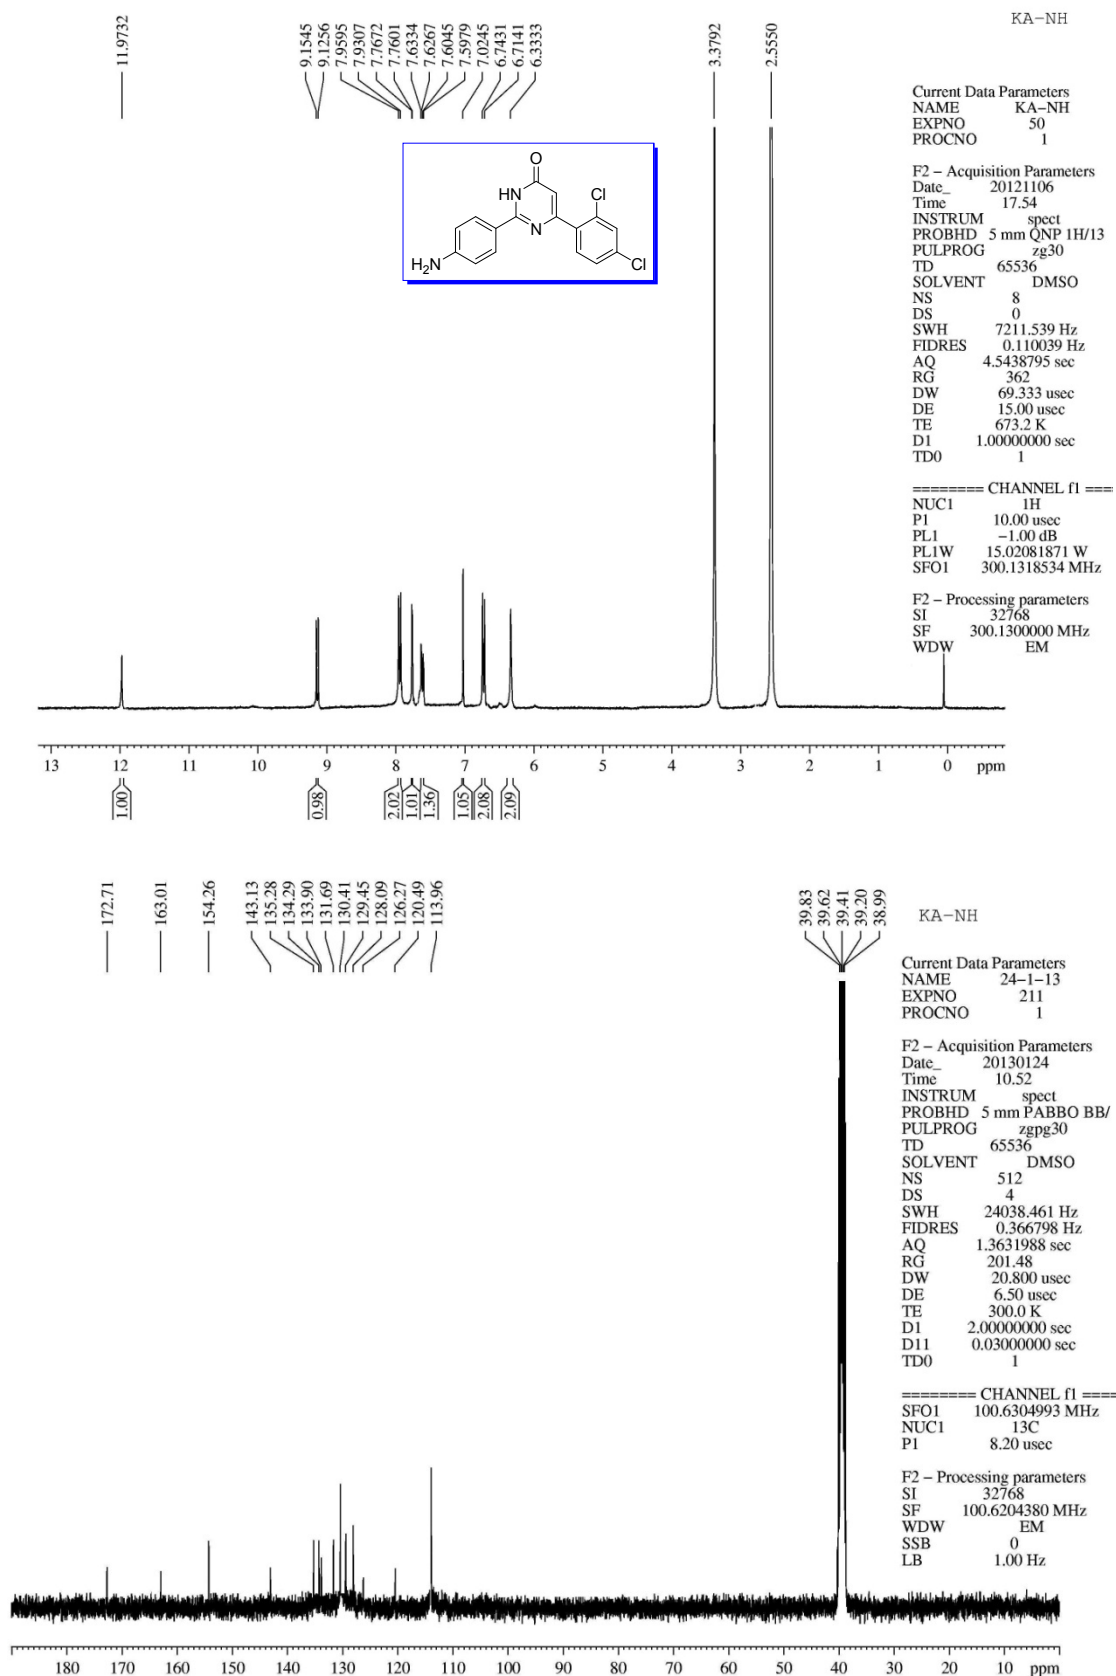

Figure 40:  $^1\text{H}$  and  $^{13}\text{C}$  Spectra of compound 5l

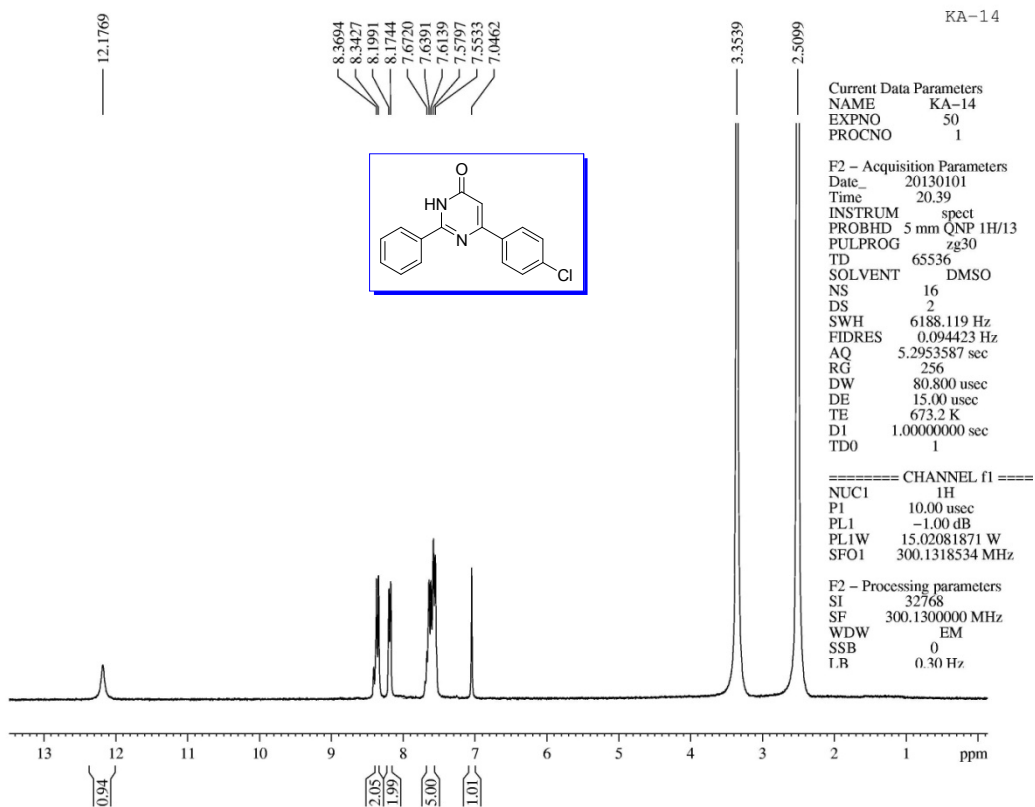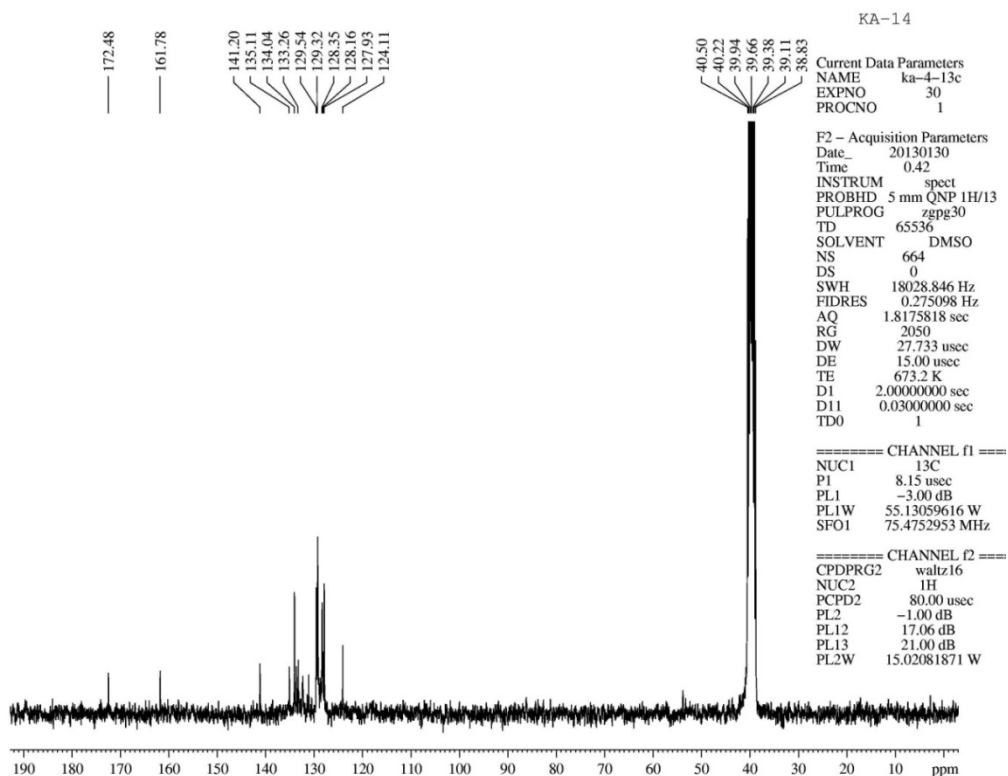

**Figure 41:  $^1\text{H}$  and  $^{13}\text{C}$  Spectra of compound 5m**

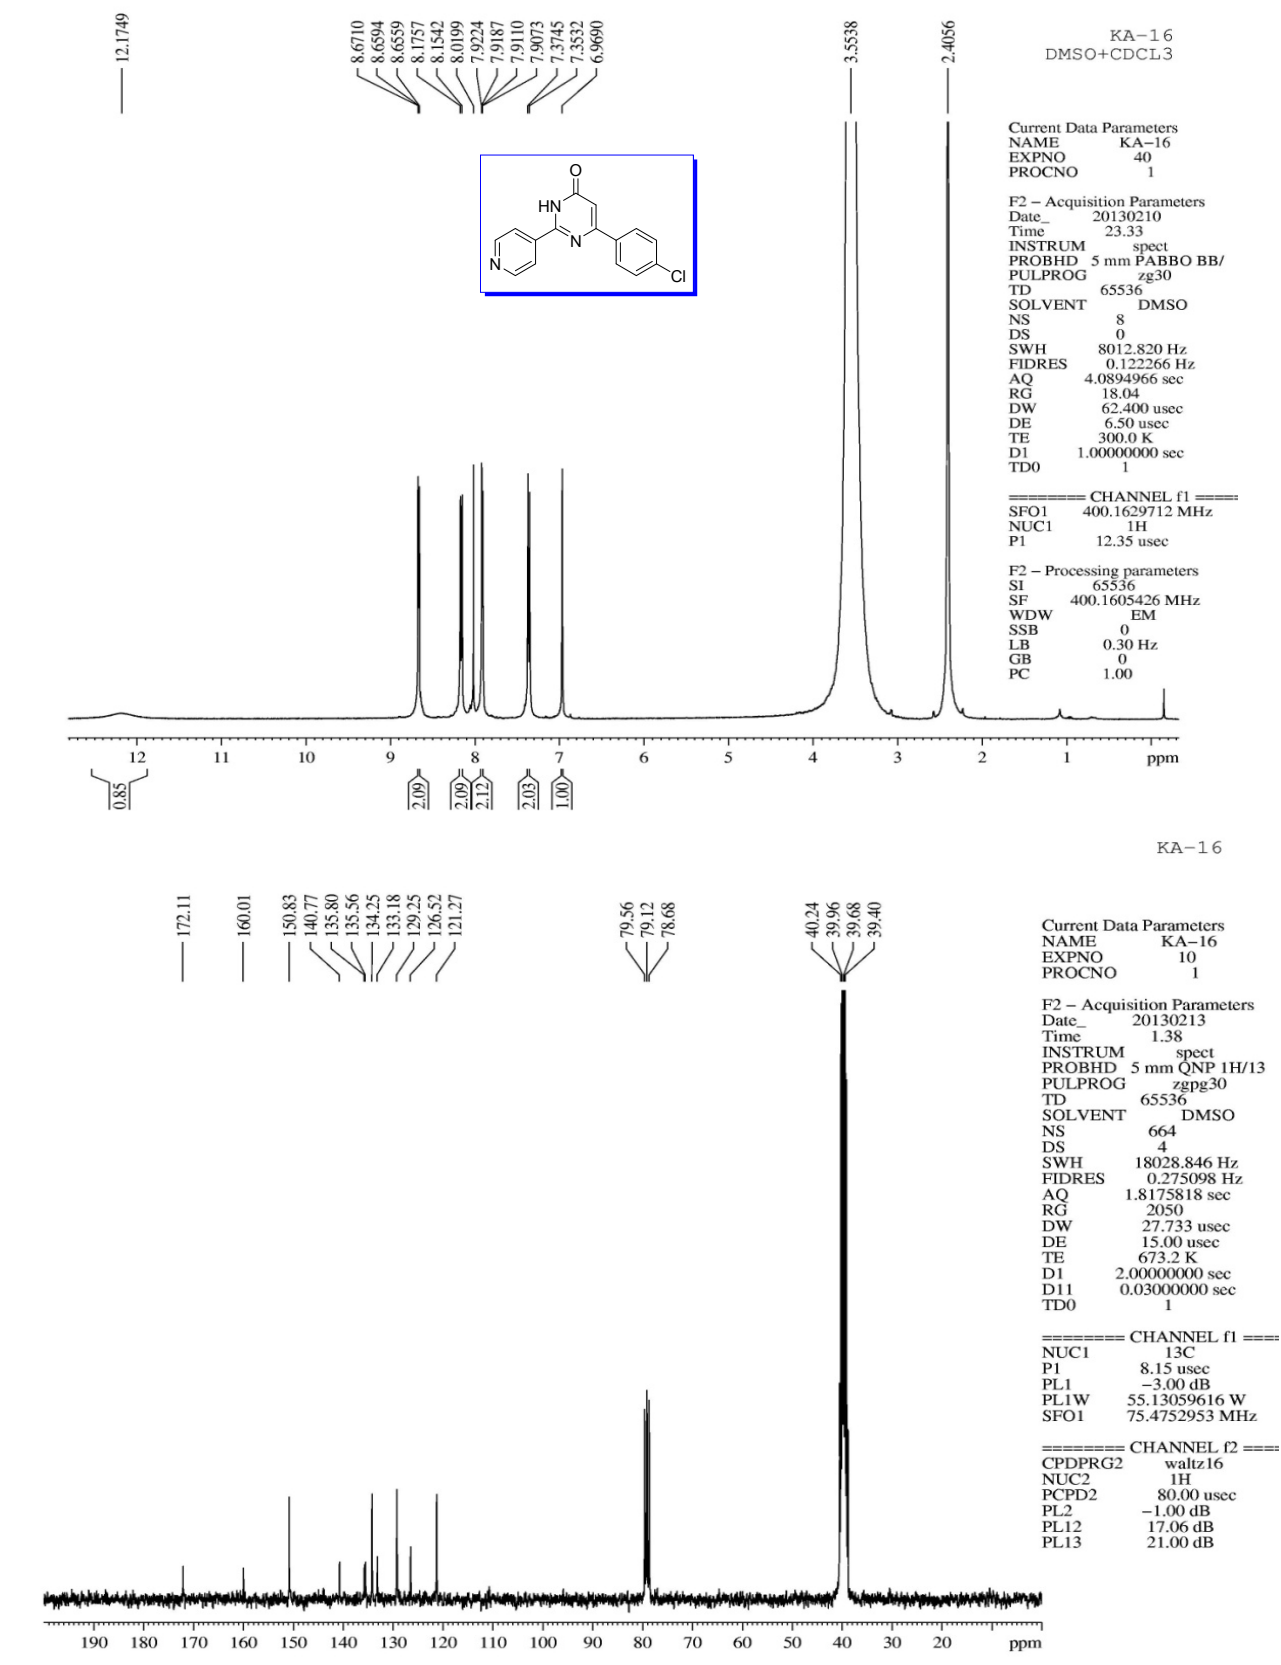

Figure 42: <sup>1</sup>H and <sup>13</sup>C Spectra of compound 5n



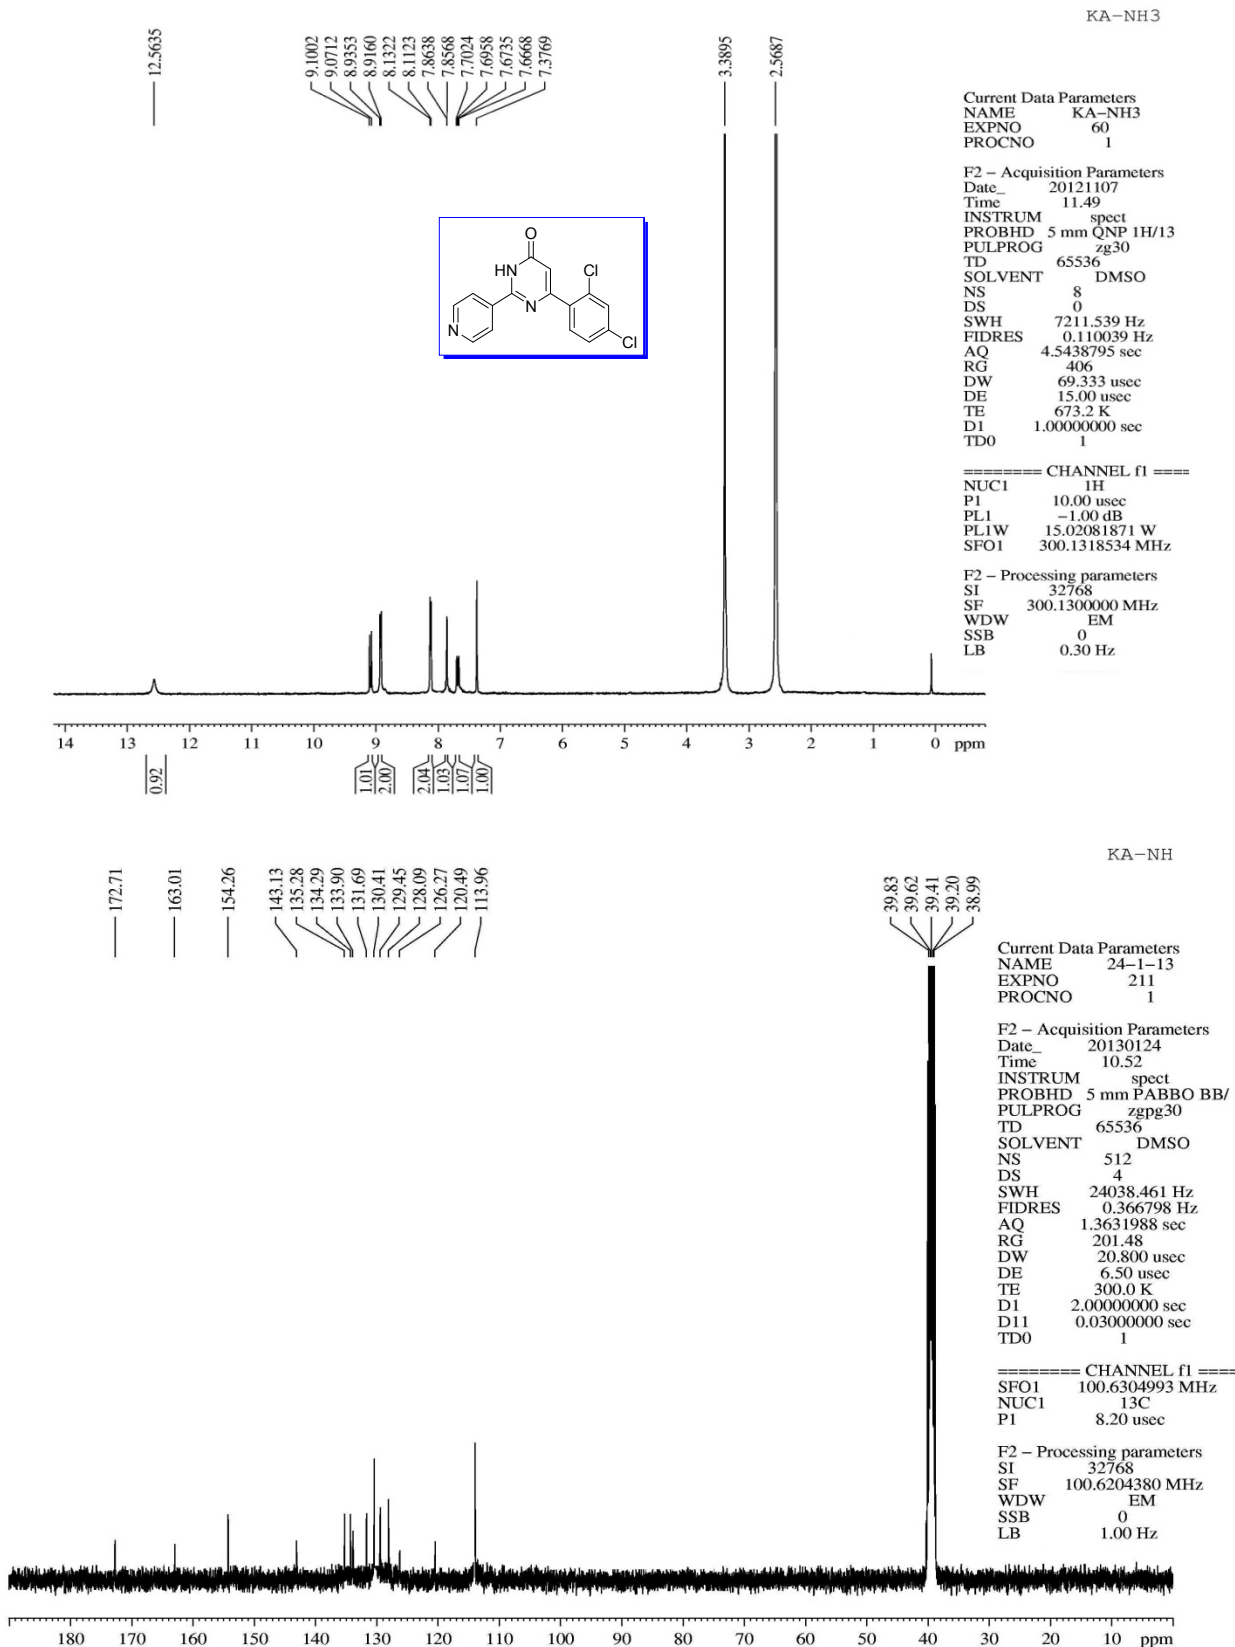

**Figure 43:  $^1\text{H}$  and  $^{13}\text{C}$  Spectra of compound 50**



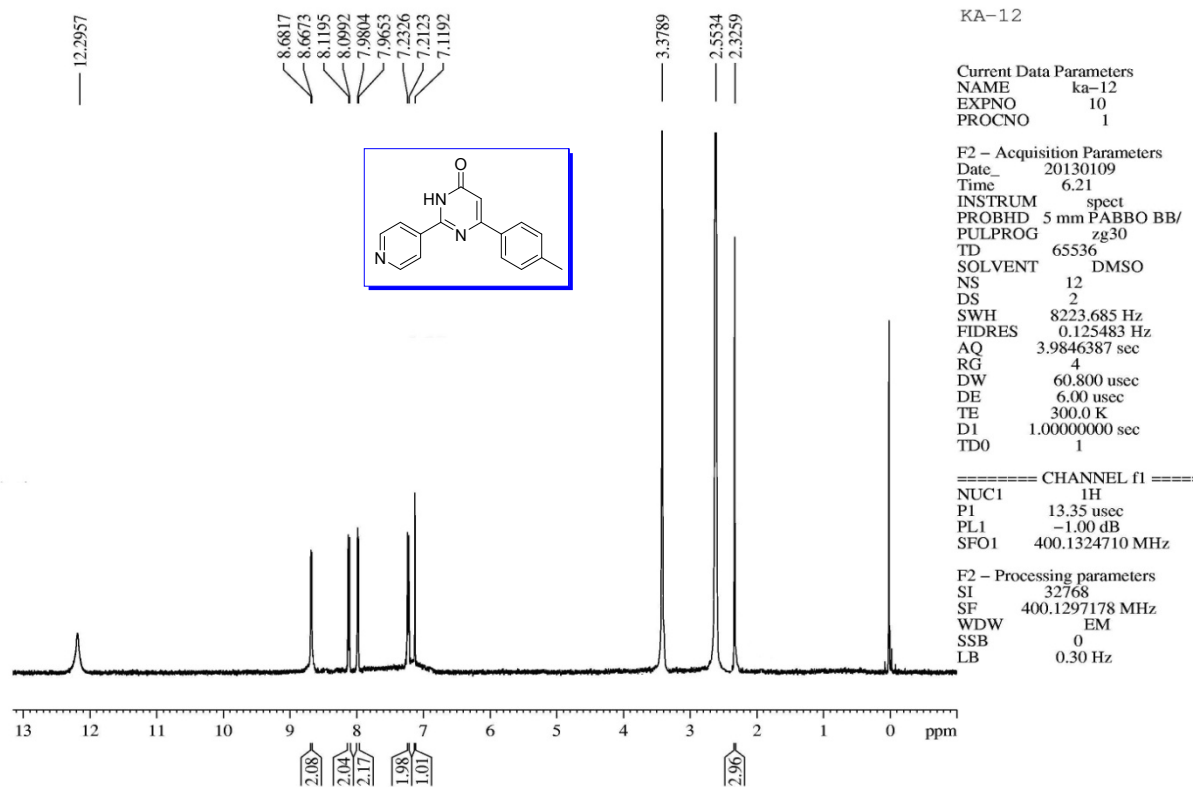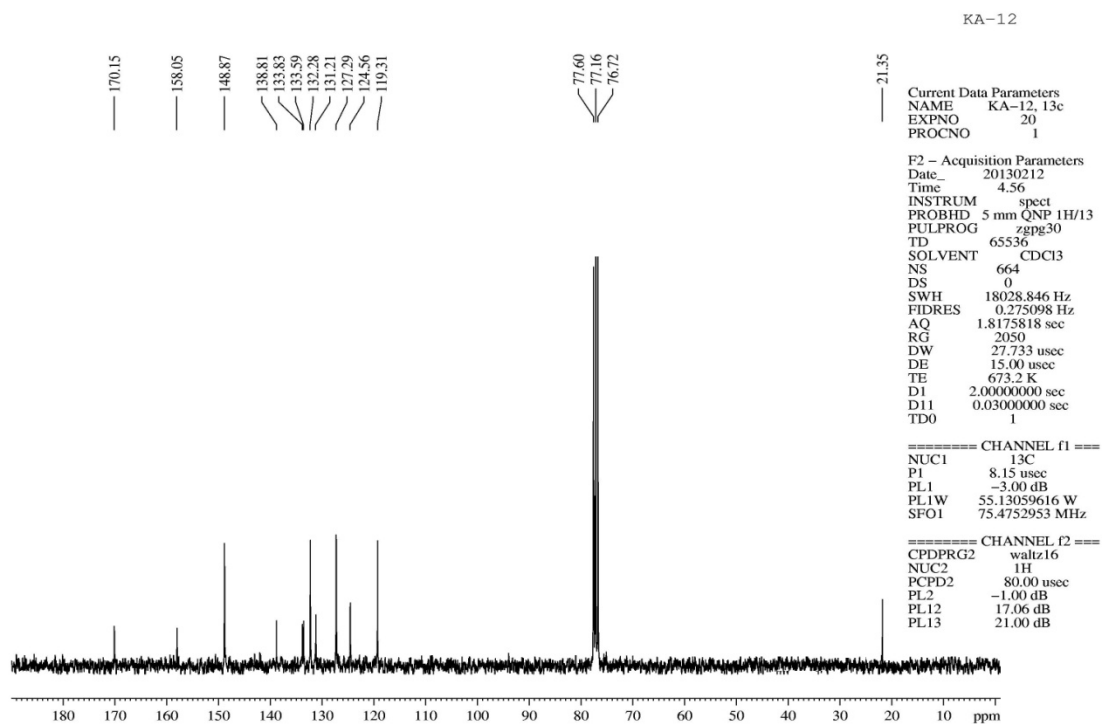

Figure 44:  $^1\text{H}$  and  $^{13}\text{C}$  Spectra of compound 5p
